# Supplementary material for: Sociodemographic, clinical and pharmacological profiles of medication misuse and dependence in hospitalised older patients in Norway: a prospective cross-sectional study
Source: PubMed Central journal article supplement — BMJ Open. 2019 Sep 5;9(9):e031483. doi: 10.1136/bmjopen-2019-031483 (PMC6731874; doi:10.1136/bmjopen-2019-031483), 2019-09-05
Supplement: bmjopen-2019-031483.draft_revisions.pdf [file bmjopen-2019-031483.draft_revisions.pdf]

# BMJ Open

BMJ Open is committed to open peer review. As part of this commitment we make the peer review history of every article we publish publicly available.

When an article is published we post the peer reviewers' comments and the authors' responses online. We also post the versions of the paper that were used during peer review. These are the versions that the peer review comments apply to.

The versions of the paper that follow are the versions that were submitted during the peer review process. They are not the versions of record or the final published versions. They should not be cited or distributed as the published version of this manuscript.

BMJ Open is an open access journal and the full, final, typeset and author-corrected version of record of the manuscript is available on our site with no access controls, subscription charges or pay-per-view fees (<http://bmjopen.bmj.com>).

If you have any questions on BMJ Open's open peer review process please email [info.bmjopen@bmj.com](mailto:info.bmjopen@bmj.com)

# BMJ Open

## Sociodemographic, clinical and pharmacological profiles of medication misuse and dependence in hospitalized older patients: a cross-sectional study

|                               |                                                                                                                                                                                                                                                                                                                                                                                                                                                                                                                                                                                                                          |
|-------------------------------|--------------------------------------------------------------------------------------------------------------------------------------------------------------------------------------------------------------------------------------------------------------------------------------------------------------------------------------------------------------------------------------------------------------------------------------------------------------------------------------------------------------------------------------------------------------------------------------------------------------------------|
| Journal:                      | <i>BMJ Open</i>                                                                                                                                                                                                                                                                                                                                                                                                                                                                                                                                                                                                          |
| Manuscript ID                 | bmjopen-2019-031483                                                                                                                                                                                                                                                                                                                                                                                                                                                                                                                                                                                                      |
| Article Type:                 | Research                                                                                                                                                                                                                                                                                                                                                                                                                                                                                                                                                                                                                 |
| Date Submitted by the Author: | 07-May-2019                                                                                                                                                                                                                                                                                                                                                                                                                                                                                                                                                                                                              |
| Complete List of Authors:     | Cheng, Socheat; Akershus Univeristy Hospital, Health Services Research; University of Oslo, Institute of Clinical Medicine, Faculty of Medicine<br>Siddiqui,, Tahreem Ghazal; Akershus University Hospital, Health Services Research Unit<br>Gossop, Michael; University of Oslo, Centre for Addiction Research; National Addiction Centre,<br>Kristoffersen, Espen Saxhaug; University of Oslo, Department of General Practice, Institute of Health and Society<br>Lundqvist, Christofer; University of Oslo, Institute of Clinical Medicine, Campus Ahus; Akershus University Hospital, Health Service Research Centre |
| Keywords:                     | Characteristics, geriatric patients, risk factors, addiction, prescription drug abuse                                                                                                                                                                                                                                                                                                                                                                                                                                                                                                                                    |
|                               |                                                                                                                                                                                                                                                                                                                                                                                                                                                                                                                                                                                                                          |

SCHOLARONE™  
Manuscripts

1  
2 **SOCIODEMOGRAPHIC, CLINICAL AND PHARMACOLOGICAL PROFILES OF**  
3 **MEDICATION MISUSE AND DEPENDENCE IN HOSPITALIZED OLDER PATIENTS:**  
4 **– a cross-sectional study**  
5  
6  
7

8 **Socheat Cheng<sup>1,2</sup>, Tahreem Ghazal Siddiqui<sup>1,2</sup>, Michael Gossop<sup>3</sup>, Espen Saxhaug Kristoffersen<sup>1,4,5</sup>,**  
9 **Christofer Lundqvist<sup>1,2,4</sup>**  
10  
11

- 12 1. Health Services Research Unit, Akershus Univeristy Hospital, Sykehusveien 25, 1478  
13 Lorenskog, Norway
- 14 2. Institute of Clinical Medicine, Campus Ahus, Faculty of Medicine, University of Oslo,  
15 Sykehusveien 25, 1475 Lorenskog, Norway
- 16 3. National Addiction Centre, Institute of Psychiatry, Psychology and Neuroscience, King's  
17 College London, PO Box 48, 4 Windsor Walk, London SE5 8AF, UK
- 18 4. Department of Neurology, Akershus Univeristy Hospital, Sykehusveien 25, 1478  
19 Lorenskog, Norway
- 20 5. Department of General Practice, Institute of Health and Society, University of Oslo, 1130  
21 Blindern 0318, Oslo, Norway

22  
23  
24  
25  
26  
27  
28  
29  
30  
31  
32  
33  
34  
35  
36  
37  
38 **Corresponding author:**

39 Socheat Cheng,  
40 Health Services Research Unit (HØKH),  
41 Akershus University Hospital,  
42 Sykehusveien 25,  
43 1478 Lorenskog,  
44 Norway  
45 Tel: +47 679 687 09  
46 E-mail: socheat.cheng@ahus.no  
47  
48  
49  
50  
51  
52  
53  
54  
55  
56  
57  
58  
59  
60

## ABSTRACT

### Objectives

Timely recognition of medication misuse and dependence is crucial to avoid both adverse drug events and increasing health expenditure. Yet, the detection of these disorders in older people remains challenging due to the paucity of evidence on characteristics of patients at risk. This study investigates sociodemographic, pharmacological and clinical characteristics and factors associated with prolonged medication use, misuse and dependence in hospitalized older patients, focusing on three commonly prescribed central nervous system depressants (CNSDs): opioid analgesics, benzodiazepines and z-hypnotics.

### Design

A cross-sectional study, complying with the Strengthening the Reporting of Observational Studies in Epidemiology (STROBE) guidelines

### Setting

Somatic departments of the Akershus University Hospital, Norway

### Participants

246 patients aged 65-90 were included.

### Outcome measures

Prolonged use was defined as using CNSDs for  $\geq 4$  weeks. Misuse and dependence were assessed with DSM-IV criteria for substance abuse and dependence. Data on sociodemographic and clinical characteristics of patients were collected through self-reported questionnaires. Data analyses were mainly descriptive statistics and regression models.

## Results

Forty percent of participants reported using CNSDs for  $\geq 4$  weeks. Z-hypnotics were the most commonly-used drugs. Prolonged users were more frequently female, aged 75-84, living alone, with lower socioeconomic status, polypharmacy, and higher pain intensity and depression scores. Those with and those without misuse or dependence did not differ significantly. The odds for prolonged use were higher among patients aged  $\geq 75$  and those with pain and polypharmacy, but lower among those who had completed secondary education. In older patients, concurrent use, rather than the duration of CNSD use increased the likelihood of misuse or dependence.

## Conclusion

CNSD overuse is prevalent among hospitalized older patients, raising a concern about an increasing incidence and consequences among elderly. Characteristics of at-risk patients and significant associations identified in this study can be used to inform ways for implementing future research initiatives and interventions.

**Key words:** characteristics, geriatric patients, risk factors, addiction, prescription drug abuse

**Trial registration:** ClinicalTrials.gov Identifier: NCT03162081. Registered 3 May 2017

## Strengths and limitations of this study

- The first and comprehensive study of characteristics and factors associated with commonly prescribed central nervous system depressants (CNSDs) prolonged use, misuse, and dependence in older hospitalized patients.
- Characteristics of at-risk patients and significant associations revealed in this study can be used to inform ways for implementing future research initiatives and interventions aiming at early detection, prevention and treatment for CNSD overuse among older patients.
- We used validated and generally accepted diagnostic criteria to assess medication misuse and dependence in older patients (DSM-IV criteria for substance abuse and dependence)
- The use of cross-sectional data and a hospital-based sample precludes us from inferring causal relationships and generalizing the study findings to the general population.

## INTRODUCTION

Central nervous system depressants (CNSDs) such as opioid analgesics, benzodiazepines and z-hypnotics are commonly prescribed among older patients for the treatment of chronic pain, anxiety and insomnia. While these medications are essential for moderate-severe cases, long-term use is not recommended owing to the risk of adverse events, including hyperalgesia, fractures, falls, cognitive impairment and dependence.<sup>1-3</sup> This underlines the importance of rational use and prescription of CNSDs for older patients. To achieve this, one of the practical steps is for clinicians to be able to timely recognize older patients at risk or suffering from medication misuse and dependence.

According to the Norwegian Prescription Database, the consumption of potentially addictive drugs such as opioid analgesics (i.e. oxycodone and tramadol), benzodiazepines (i.e. diazepam, oxazepam and nitrazepam) and z-hypnotics (i.e. zopiclone and zolpidem) is high among individuals aged 65 and older. These drugs were among the 30 most commonly prescribed drugs to older patients in Norway in 2017.<sup>4</sup>

A Norwegian study showed that the patients' regular general practitioners (GPs) prescribed the largest proportion of addictive drugs to their older patients (77%) compared to other groups of physicians.<sup>5</sup> In line with this, another study, found that CNSDs were frequently prescribed by GPs in large quantities and through indirect contacts without consultation.<sup>6</sup> Both inappropriate prescribing and the high consumption of such addictive medications may put older patients at risk of medication misuse and dependence – a condition characterized by persistent and compulsive use of a medication despite impairment in physical, social and psychological health.<sup>7</sup>

Given the vulnerability to serious adverse effects and interactions as a result of age-related changes in pharmacokinetics and pharmacodynamics, timely recognition and treatment of medication misuse and dependence in older patients are crucial to ensure medication safety and to avoid increasing health expenditure.<sup>8</sup> Yet, the detection of these disorders in older people is challenging. Major hurdles that impede clinicians in arriving at an early identification of at-risk patients may include the paucity of screening tools validated for geriatric patients and the lack of

1  
2 evidence on disease profiles and factors that add to an older patient's risk for starting and persisting  
3  
4 in using a potentially addictive drug.<sup>7 9</sup> Until these knowledge gaps are addressed, early diagnosis  
5  
6 and evidence-based interventions for medication misuse and dependence in older patients will  
7  
8 remain difficult to attain.  
9

10  
11 This study investigates sociodemographic, pharmacological and clinical characteristics and  
12  
13 factors associated with prolonged medication use, misuse and dependence in hospitalized older  
14  
15 patients, focusing on three commonly prescribed central nervous system depressants (CNSDs):  
16  
17 opioid analgesics, benzodiazepines and z-hypnotics.  
18  
19  
20  
21

## 22 **METHODS**

### 23 **Study design**

24  
25 The study was a cross-sectional, in-hospital study and complies with the Strengthening the  
26  
27 Reporting of Observational Studies in Epidemiology (STROBE) guidelines.  
28  
29  
30  
31

### 32 **Participants and setting**

33  
34 The recruitment process took place between May 2017 and September 2018, at three somatic  
35  
36 departments of the Akershus University Hospital: Geriatrics, General Internal Medicine and  
37  
38 Neurology. The catchment area of the hospital covers roughly 10% of the total population of  
39  
40 Norway. Participants were recruited at the first few days of admission based on predefined  
41  
42 inclusion and exclusion criteria (NCT03162081), and not on their vulnerability, reasons for  
43  
44 admission, diagnosis or severity of disease. As Norway has an all-covering national health  
45  
46 insurance, all patients enter the hospital on the same conditions and with the same in-patient  
47  
48 threshold. The study inclusion criteria were hospitalized patients, aged between 65 and 90 years old.  
49  
50 The exclusion criteria included Mini-Mental State Examination (MMSE) score  $\leq 21$  (incapacity to  
51  
52 give informed consent);<sup>10 11</sup> pre-existing severe depression, stroke, dementia, psychotic disorders;  
53  
54 serious visual or hearing impairment; and insufficient Norwegian language. We precluded  
55  
56  
57  
58  
59  
60

1  
2 participants who were in a too serious medical condition or palliative treatment, defined by  
3  
4 physicians at the study setting.  
5  
6  
7

### 8 9 **Data collection**

10  
11 Data collection (by SC, TGS and CL) involved three steps. After consent had been given, all  
12  
13 eligible participants were asked to complete a questionnaire on sociodemographic background,  
14  
15 pain, anxiety and depression. At this stage, the investigators were blinded to the use of medications  
16  
17 as this was registered in the electronic patient record (EPR) which could only be accessed once a  
18  
19 written informed consent had been obtained. Having fulfilled this requirement, the EPRs were  
20  
21 reviewed to document the use of medications (type, duration, frequency and polypharmacy).  
22  
23 Finally, the presence of medication misuse or dependence among participants identified as  
24  
25 prolonged users of CNSDs was assessed through a structured interview. Prior to the start of the  
26  
27 study, the three data collectors had gone through training sessions in order to optimize congruent  
28  
29 use of the interview. More details on definition, data sources, and measurements for variables under  
30  
31 investigations are given in the section below.  
32  
33  
34  
35

### 36 37 **Sociodemographic and clinical variables**

38  
39 Sociodemographic variables included age (65-74, 75-84, and  $\geq 85$ ); sex (Male, Female); education  
40  
41 (basic, secondary, and higher education); annual income (<200 000, 200 000 – 349 000, and  $\geq$   
42  
43 350 000 Norwegian Krone (NOK) per year); and living alone (Yes, No). Clinical variables  
44  
45 consisted of pain intensity (continuous, measured using visual analog scale - VAS); Anxiety and  
46  
47 depressive symptoms were assessed with the Hospital Anxiety and Depression Scale (HADS).  
48  
49 Optimal cut-off values for diagnosing anxiety and depression in older hospitalized patients using  
50  
51 HADS remain to be established.<sup>12 13</sup> To avoid underestimation and misclassification bias of anxious  
52  
53 and depressed individuals, we used anxiety and depression scores as continuous variables. Higher  
54  
55 scores indicate higher levels of anxiety and depressive symptoms.<sup>14</sup> Data for all of these variables  
56  
57 were collected through a self-completed questionnaire.  
58  
59  
60



## Pharmacological variables

We defined prolonged use of CNSDs as the use of opioid analgesics, benzodiazepines and/or z-hypnotics for four weeks or longer continuously up to the point of recruitment,<sup>15 16</sup> while non-prolonged use was non-use or use of these medications for less than four weeks. Medication misuse and dependence were defined based on DSM-IV criteria for substance abuse and dependence, using the Norwegian version of the Mini-International Neuropsychiatric Interview Guide – MINI.<sup>17</sup> Dependence was defined to be present if patients met three or more of the dependence criteria. Misuse was confirmed if the dependence criteria were not met and the respondents satisfied one or more of the abuse criteria.<sup>18</sup> For the purpose of the present study, and as few patients fulfilled misuse criteria (n=6), misuse and dependence were grouped together as medication misuse or dependence (n=39). Other pharmacological variables entailed types of CNSD medications used (categorized as exclusive or concurrent use), duration of use (continuous, in week); frequency of use (categorized as sporadic use if the medication was taken intermittently < 5 days per week and as daily use if the medication was taken ≥ 5 days per week); Polypharmacy<sup>19</sup> (defined as the use of ≥5 medications daily, coded as Yes or No). Data for these variables was collected through structured interviews and reviewing EPRs. To ensure the accuracy of data on CNSD use patterns, we checked for evidence of use and consistency across prescriptions and relevant documents reported from both primary care and hospital settings.

## Statistical analysis

We compared the characteristics of older patients with and without prolonged use, and that of those with and without misuse or dependence using descriptive statistics and difference inferential statistics. Categorical variables such as sex, age groups, education, annual income, living alone and polypharmacy were analyzed using  $\chi^2$  tests. Continuous data on duration of CNSD use, pain intensity, anxiety and depression scores were skewed, and were therefore analyzed with Mann-Whitney test.

1  
2  
3  
4 We assessed the associations between patient characteristics and the presence of prolonged CNSD  
5 use, and misuse or dependence using bivariate and multiple logistic regression analyses. The  
6 analyses included adjustment for sociodemographic subgroups, clinical and pharmacological  
7 variables as described on page 6 (Methods). Multiple imputation using chained equations (with 20  
8 imputed data sets) were performed to handle missing data. Sensitivity analyses were conducted for  
9 the same models using complete case analysis. No multicollinearity was detected. Stata-SE software  
10 version 15 was used for all statistical analyses.<sup>20</sup>

### 21 22 **Patient and public involvement**

23  
24 A user advisory board established at the Akershus University Hospital (the study setting), which  
25 included both representatives of older patients and health service officials, supported this study. The  
26 board met on a regular basis throughout the study period. They provided project-specific inputs on  
27 ethics, design and methodology as well as highlighted research focus based on patient and public  
28 interests. They will also be involved in the dissemination of the findings.

## 39 **RESULTS**

### 40 41 **Participants**

42  
43 In total, we consecutively approached 665 adults aged 65-90. Of these, 227 participants declined to  
44 participate, while 92 others were precluded due to either being in a too serious medical condition or  
45 palliative treatment. Of the remaining patients, 100 were excluded based on predefined exclusion  
46 criteria. This resulted in 246 older patients eligible for the study, of which 100 were thereafter  
47 identified as prolonged users of CNSDs ( $\geq$  four weeks). Figure 1 provides more details on the flow  
48 of participants through the study.

There were no missing data in the variables: prolonged use, misuse or dependence, concurrent use, duration of CNSD use, age groups, sex, living alone and polypharmacy. The following variables had missing data: pain intensity 7% (18/246), anxiety scores 7% (17/246), depression scores 7% (17/246), education 6% (14/246), and income 16% (39/246).

### Differences in sociodemographic, pharmacological and clinical characteristics of older patients with and without prolonged use, misuse and dependence

Overall, in descriptive analyses, older patients with prolonged use of CNSDs were significantly more often female, aged 75-85, living alone, with lower socioeconomic status (completed  $\leq$  secondary education and earned  $<$  350000 NOK/year), polypharmacy and accompanied by higher pain intensity and depression scores (Table 1). Apart from the variable living alone (69% of those classified as misuse or dependence), we did not find any significant differences between those with and without medication misuse or dependence in terms of their sociodemographic, pharmacological and clinical characteristics. More details are provided in Table 1.

**Table 1.** Sociodemographic, pharmacological and clinical characteristics of older patients with and without prolonged CNSD use, misuse and dependence

| Patient characteristics       | Prolonged use of CNSDs (n = 246) |             |              | CNSD misuse or dependence (n = 100) |            |             |
|-------------------------------|----------------------------------|-------------|--------------|-------------------------------------|------------|-------------|
|                               | No (n=146)                       | Yes (n=100) | P-value      | No (n=61)                           | Yes (n=39) | P-value     |
| <b>Sex</b>                    |                                  |             |              |                                     |            |             |
| Female                        | 71 (49%)                         | 66 (66%)    | <b>0.009</b> | 38 (62%)                            | 28 (72%)   | 0.39        |
| Male                          | 75 (51%)                         | 34 (34%)    |              | 23 (38%)                            | 11 (28%)   |             |
| <b>Age groups</b>             |                                  |             |              |                                     |            |             |
| 65-74                         | 73 (50%)                         | 28 (28%)    | <b>0.001</b> | 18 (29%)                            | 10 (25%)   | 0.16        |
| 75-84                         | 59 (40%)                         | 51 (51%)    |              | 34 (56%)                            | 17 (44%)   |             |
| $\geq$ 85                     | 14 (10%)                         | 21 (21%)    |              | 9 (15%)                             | 12 (31%)   |             |
| <b>Education, years</b>       |                                  |             |              |                                     |            |             |
| Basic education ( $\leq$ 10)  | 16 (12%)                         | 30 (32%)    | <b>0.001</b> | 17 (29%)                            | 13 (36%)   | 0.67        |
| Secondary education (11-13)   | 64 (46%)                         | 31 (33%)    |              | 21 (36%)                            | 10 (28%)   |             |
| Higher education ( $\geq$ 14) | 58 (42%)                         | 33 (35%)    |              | 20 (35%)                            | 13 (36%)   |             |
| <b>Income (NOK/year)</b>      |                                  |             |              |                                     |            |             |
| $<$ 200 000                   | 8 (7%)                           | 13 (15%)    | <b>0.001</b> | 7 (14%)                             | 6 (18%)    | 0.31        |
| 200 000–349 000               | 42 (34%)                         | 43 (51%)    |              | 24 (46%)                            | 19 (58%)   |             |
| $\geq$ 350 0000               | 72 (59%)                         | 29 (34%)    |              | 21 (40%)                            | 8 (24%)    |             |
| <b>Living alone</b>           |                                  |             |              |                                     |            |             |
| No                            | 87 (60%)                         | 45 (45%)    | <b>0.03</b>  | 33 (54%)                            | 12 (31%)   | <b>0.02</b> |
| Yes                           | 59 (40%)                         | 55 (55%)    |              | 28 (46%)                            | 27 (69%)   |             |

|    |                                                     |               |                |                   |                |               |              |
|----|-----------------------------------------------------|---------------|----------------|-------------------|----------------|---------------|--------------|
| 1  |                                                     |               |                |                   |                |               |              |
| 2  | <b>Polypharmacy (<math>\geq 5</math> drugs/day)</b> |               |                |                   |                |               |              |
| 3  | No                                                  | 55 (38%)      | 8 (8%)         | <b>&lt; 0.001</b> | 6 (10%)        | 2 (5%)        | 0.48         |
| 4  | Yes                                                 | 91 (62%)      | 92 (92%)       |                   | 55 (90%)       | 37 (95%)      |              |
| 5  |                                                     |               |                |                   |                |               |              |
| 6  | <b>Anxiety scores (HADS-A)</b>                      |               |                |                   |                |               |              |
| 7  | Mean (SD)                                           | 4.13 (3.28)   | 4.97 (3.91)    | 0.17              | 4.47 (3.54)    | 5.68 (4.34)   |              |
| 8  | Median (Range)                                      | 4 (0-14)      | 4 (0-16)       |                   | 4 (0-16)       | 5 (0-15)      | 0.24         |
| 9  |                                                     |               |                |                   |                |               |              |
| 10 | <b>Depression scores (HADS-D)</b>                   |               |                |                   |                |               |              |
| 11 | Mean (SD)                                           | 3.60 (2.98)   | 5.13 (3.49)    |                   | 4.89 (3.26)    | 5.49 (3.81)   |              |
| 12 | Median (Range)                                      | 3 (0-13)      | 4 (0-15)       | <b>&lt;0.001</b>  | 4 (0-12)       | 5 (0-15)      | 0.56         |
| 13 | <b>Pain intensity</b>                               |               |                |                   |                |               |              |
| 14 | (millimeters on VAS scale)                          |               |                |                   |                |               |              |
| 15 | Mean (SD)                                           | 18.07 (24.21) | 35.20 (30.35)  | <b>&lt;0.001</b>  | 30.56 (28.30)  | 42.08 (32.34) |              |
| 16 | Median (Range)                                      | 7 (0-91)      | 29.50 (0-97)   |                   | 27 (0-97)      | 48 (0-93)     | 0.10         |
| 17 |                                                     |               |                |                   |                |               |              |
| 18 | <b>Duration of CNSD use (weeks)</b>                 |               |                |                   |                |               |              |
| 19 | Mean (SD)                                           | -             | 71.47 (113.44) | -                 | 72.10 (138.38) | 70.48 (57.36) | 0.06         |
| 20 | Median (Range)                                      | -             | 50.50 (4-988)  | -                 | 33 (4-988)     | 52 (4-232)    |              |
| 21 | <b>Concurrent use (of &gt;1 CNSDs)</b>              |               |                |                   |                |               |              |
| 22 | No (exclusive use)                                  | -             | 70 (70%)       | -                 | 49 (80%)       | 21 (54%)      | <b>0.007</b> |
| 23 | Yes                                                 | -             | 30 (30%)       | -                 | 12 (20%)       | 18 (46%)      |              |

Abbreviations:

CNSD – central nervous system depressant drugs;

HADS-D/A – hospital anxiety and depression scale, depression or anxiety subscore.

## Medication use patterns

Forty percent of the older patients enrolled in this study (100 out of 246 participants) were identified as prolonged users ( $\geq 4$  weeks) of opioid analgesics, benzodiazepines and/or z-hypnotics. Figure 2 illustrates the proportion of prolonged users of the three listed CNSDs and concurrent use of more than one medication group. The dominant group of medications was Z-hypnotics, accounting for 42% (42/100) as exclusive use and 26% (26/100) as concurrent use of Z-hypnotics plus other CNSDs, followed by opioid analgesics, which comprised 21% (21/100) as exclusive use and 23% (23/100) as concurrent use. Benzodiazepines were less commonly used and constituted 7% (7/100) as exclusive use and 13% (13/100) as concurrent use. 30% (30/100) of the prolonged users in our sample concurrently consumed two or more different types of CNSDs. The most prevalent pattern of concurrent use was the combination of z-hypnotics and opioid analgesics, amounting to 57% (17/30) of all forms of current use.

The majority of older patients using CNSDs, did so on long-term and daily basis. The medians for duration of use for opioid analgesics, benzodiazepines and z-hypnotics were 42 (4-988), 51 (4-208)

and 52 (4-232) weeks respectively. More than half of the prolonged users reported using these medications daily (5-7 days per week): opioid analgesics (26/44), benzodiazepines (15/20) and/or z-hypnotics (51/68).

Among all the prolonged users of CNSDs, 39% (39/100) met the DSM-IV criteria for substance abuse or dependence. The non-mutually exclusive proportion of misuse or dependence for opioid analgesics, benzodiazepines and z-hypnotics were 30% (13/44), 40% (8/20) and 41% (28/68) respectively.

### Factors associated with prolonged use of CNSDs

In the multivariate model, factors associated with increasing odds for prolonged use of CNSDs included being aged 75-84 (OR= 2.32, 95%CI: 1.16-4.65) and  $\geq 85$  years old (OR= 3.33, 95%CI: 1.25-8.87) compared to age <75; having more intense pain according to the VAS scale (OR=1.02, 95%CI: 1.01-1.04) and polypharmacy (OR=5.16, 95%CI: 2.13-12.55). On the contrary, the odds were lower among patients who had completed at least secondary education (OR= 0.33, 95%CI: 0.13-0.83) compared to only basic education (Table 2). In the sensitivity analysis using complete case analysis, the associations between these factors and the prolonged use of CNSDs remained significant (Appendix 1). Sex, income, anxiety and depression scores were not significantly associated with prolonged use of CNSDs.

**Table 2.** Logistic regression models for factors associated with prolonged use of CNSDs – estimated using multiple imputations.

| Independent variable     | Bivariate model  |              | Multivariate model  |             |
|--------------------------|------------------|--------------|---------------------|-------------|
|                          | OR (95%CI)       | P-value      | Adjusted OR (95%CI) | P-value     |
| <b>Sex</b>               |                  |              |                     |             |
| Male                     | 1                |              | 1                   |             |
| Female                   | 2.05 (1.21-3.47) | <b>0.007</b> | 1.56 (0.80-3.02)    | 0.19        |
| <b>Age groups, years</b> |                  |              |                     |             |
| 65-74                    | 1                |              | 1                   |             |
| 75-84                    | 2.25 (1.27-4.00) | <b>0.006</b> | 2.32 (1.16-4.65)    | <b>0.02</b> |
| $\geq 85$                | 3.91 (1.75-8.74) | <b>0.001</b> | 3.33 (1.25-8.87)    | <b>0.02</b> |

|                                                     |                   |                  |                   |  |                  |
|-----------------------------------------------------|-------------------|------------------|-------------------|--|------------------|
| <b>Education, years</b>                             |                   |                  |                   |  |                  |
| Basic education ( $\leq 10$ )                       | 1                 |                  | 1                 |  |                  |
| Secondary education (11-13)                         | 0.29 (0.14-0.60)  | <b>0.001</b>     | 0.33 (0.13-0.83)  |  | <b>0.02</b>      |
| Higher education ( $\geq 14$ )                      | 0.34 (0.16-0.71)  | <b>0.004</b>     | 0.45 (0.18-1.12)  |  | 0.09             |
| <b>Income (NOK/year)</b>                            |                   |                  |                   |  |                  |
| < 200 000                                           | 1                 |                  | 1                 |  |                  |
| 200 000 – 349 000                                   | 0.73 (0.27-1.93)  | 0.52             | 0.67 (0.20-2.24)  |  | 0.52             |
| $\geq 350 000$                                      | 0.33 (0.12-0.88)  | <b>0.03</b>      | 0.35 (0.10-1.23)  |  | 0.10             |
| <b>Living alone</b>                                 |                   |                  |                   |  |                  |
| No                                                  | 1                 |                  | 1                 |  |                  |
| Yes                                                 | 1.80 (1.08-3.01)  | <b>0.03</b>      | 0.94 (0.47-1.88)  |  | 0.86             |
| <b>Polypharmacy (<math>\geq 5</math> drugs/day)</b> |                   |                  |                   |  |                  |
| No                                                  | 1                 |                  | 1                 |  |                  |
| Yes                                                 | 6.95 (3.13-15.41) | <b>&lt;0.001</b> | 5.16 (2.13-12.55) |  | <b>&lt;0.001</b> |
| <b>Anxiety scores (HADS-A)</b>                      | 1.06 (0.98-1.14)  | 0.14             | 1.01 (0.91-1.13)  |  | 0.80             |
| <b>Depression scores (HADS-D)</b>                   | 1.14 (1.05-1.24)  | <b>0.002</b>     | 1.08 (0.95-1.22)  |  | 0.21             |
| <b>Pain intensity (millimeters on VAS scale)</b>    | 1.02 (1.01-1.03)  | <b>&lt;0.001</b> | 1.02 (1.01-1.04)  |  | <b>&lt;0.001</b> |

Abbreviations:

CNSD – central nervous system depressant drugs

HADS–D/A – hospital anxiety and depression scale, depression or anxiety subscore.

### Factors associated with CNSD misuse or dependence

Table 3 shows results of bivariate and multiple logistic regression analyses of factors associated with CNSD misuse or dependence, estimated using multiple imputations. We found that concurrent use of CNSDs and pain intensity had a significant association with misuse or dependence. In the multivariate model, we found that compared to exclusive use, concurrent use of two or more CNSDs increased the odds for misuse or dependence by 4 times (OR= 3.99, 95%CI: 1.34-11.88). Moreover, as pain intensity increased by 1 millimeter on 100 mm VAS scale, the odds for misuse or dependence increased by 1.02 units (OR= 1.02, 95%CI: 1.01-1.04). Sensitivity analysis using complete case analysis yield consistent results (Appendix 2).

**Table 3.** Logistic regression models for factors associated with CNSD misuse or dependence – estimated using multiple imputations.

| Independent variables                          | Bivariate model   |              | Multivariate model  |             |
|------------------------------------------------|-------------------|--------------|---------------------|-------------|
|                                                | OR (95%CI)        | P-value      | Adjusted OR (95%CI) | P-value     |
| <b>Sex</b>                                     |                   |              |                     |             |
| Male                                           | 1                 |              | 1                   |             |
| Female                                         | 1.54 (0.65-3.67)  | 0.33         | 1.13 (0.39-3.21)    | 0.83        |
| <b>Age, years</b>                              |                   |              |                     |             |
| 65-74                                          | 1                 |              | 1                   |             |
| 75-84                                          | 0.90 (0.34-2.37)  | 0.83         | 1.37 (0.42-4.50)    | 0.60        |
| ≥ 85                                           | 2.40 (0.75-7.65)  | 0.14         | 2.30 (0.56-9.45)    | 0.25        |
| <b>Education, years</b>                        |                   |              |                     |             |
| Basic education (≤10)                          | 1                 |              | 1                   |             |
| Secondary education (11-13)                    | 0.61 (0.22-1.72)  | 0.35         | 0.84 (0.23-3.03)    | 0.78        |
| Higher education (≥14)                         | 0.86 (0.32-2.34)  | 0.77         | 1.09 (0.31-3.81)    | 0.89        |
| <b>Income (NOK/year)</b>                       |                   |              |                     |             |
| < 200 000                                      | 1                 |              | 1                   |             |
| 200 000 – 349 000                              | 0.85 (0.24-2.98)  | 0.80         | 1.26 (0.26-6.26)    | 0.77        |
| ≥ 350 000                                      | 0.49 (0.13-1.88)  | 0.30         | 0.73 (0.11-4.83)    | 0.75        |
| <b>Living alone</b>                            |                   |              |                     |             |
| No                                             | 1                 |              | 1                   |             |
| Yes                                            | 2.65 (1.14-6.18)  | <b>0.02</b>  | 2.06 (0.65-6.48)    | 0.22        |
| <b>Polypharmacy (≥ 5 drugs/d)</b>              |                   |              |                     |             |
| No                                             | 1                 |              | 1                   |             |
| Yes                                            | 2.02 (0.39-10.55) | 0.41         | 1.88 (0.25-14.21)   | 0.54        |
| <b>Concurrent use (of &gt;1 CNSDs)</b>         |                   |              |                     |             |
| No (exclusive use)                             | 1                 |              | 1                   |             |
| Yes                                            | 3.5 (1.44-8.54)   | <b>0.006</b> | 3.99 (1.34-11.88)   | <b>0.01</b> |
| <b>Duration of CNSD use (weeks)</b>            | 1.00 (0.99-1.00)  | 0.94         | 1.00 (0.99-1.00)    | 0.33        |
| <b>Anxiety scores (HADS-A)</b>                 | 1.08 (0.97-1.21)  | 0.14         | 1.06 (0.88-1.26)    | 0.55        |
| <b>Depression scores (HADS-D)</b>              | 1.05 (0.93-1.19)  | 0.41         | 0.99 (0.81-1.20)    | 0.90        |
| <b>Pain intensity (millimeters, VAS scale)</b> | 1.01 (0.99-1.03)  | 0.08         | 1.02 (1.01-1.04)    | <b>0.04</b> |

Abbreviations: CNSD – central nervous system depressant drugs; HADS–D/A – hospital anxiety and depression scale, depression or anxiety subscore.

## DISCUSSION

Our study shows that prolonged, concurrent and daily use of CNSDs is prevalent among hospitalized older patients. Z-hypnotics were the most commonly used drugs, both in exclusive and concurrent use patterns (with other CNSDs). In this particular group of patients, the presence of prolonged CNSD use was more common among patients with the following characteristics: being female, aged 75-84 years old, living alone, with lower socioeconomic status, polypharmacy, higher pain intensity and depression scores. Patients with and without misuse or dependence, according to DSM-IV criteria, did not differ significantly except for the fact that among those living alone there was a high prevalence of these disorders. The odds for prolonged CNSD use were higher among patients aged  $\geq 75$  years old and those with higher pain intensity and polypharmacy. Having completed secondary education was protective against the prolonged use. In older patients, concurrent use of more than one addictive medication, rather than the duration of use increased the likelihood of CNSD misuse or dependence.

One of the strengths of this study is that it provides evidence on characteristics of older patients with prolonged CNSD use, misuse, and dependence, from many different aspects (sociodemographic, pharmacological and clinical profiles). We adhered strictly to the STROBE reporting guidelines, ethical standards, and outcome measures were predefined (NCT03162081). Moreover, we used validated and generally accepted criteria (DSM-IV criteria) to assess medication misuse and dependence in older patients. Nonetheless, the study has some limitations. We acknowledge that the use of a consecutive hospital-based sample represents a limitation regarding generalizability of the study findings to the general population. However, our study should be reasonably representative for somatic hospital populations of older people. We suggest that hospitals may be good settings for conducting research on medication-related problems as they represent settings where older patients often get their medication regimens changed and also where they may therefore be at risk for adverse drug events and, consequently, where this focus is important. Another issue, which suggests some care in interpretation of our results, is the relatively



1  
2 high number of patients that declined participation. It may be that those who declined represent  
3  
4 either those with the most serious medical conditions or those that were not interested in being  
5  
6 queried regarding their medication use, thus suggesting that our sample may be somewhat biased  
7  
8 towards milder cases. In addition, the use of cross-sectional data precludes us from inferring  
9  
10 causality of the observed associations.  
11  
12

13  
14 Our study delivers a number of new and important insights pertaining to medication misuse  
15  
16 and dependence in older patients. First, our study showed that concurrent use of CNSDs is still  
17  
18 common among older patients. This is despite recommendations specified in the national treatment  
19  
20 guidelines and evidence on the risk of fatal overdose.<sup>21-25</sup> Second; we comprehensively explored  
21  
22 patient characteristics associated with the presence of CNSD prolonged use among hospitalized  
23  
24 older patients, which may be useful for raising the awareness of patient groups that may be at  
25  
26 increased risk.  
27  
28

29  
30 Among geriatric patients, age-related pharmacokinetic and pharmacodynamics changes, chronic  
31  
32 diseases, polypharmacy, and cognitive impairment can all interact and lead to greater vulnerability  
33  
34 to harmful effects of medication overuse. According to both the national (NORGEP) and  
35  
36 international (Beers and STOPP) criteria and treatment guidelines, opioid analgesics,  
37  
38 benzodiazepines and z-hypnotics are all classified as inappropriate drugs for older patients and  
39  
40 should not be used on a long-term basis. Our findings are consistent with three studies previously  
41  
42 conducted in Norway and suggest that today's prescribing behavior is suboptimal and that more in-  
43  
44 depth research and educational interventions are needed.<sup>6 16 26</sup>  
45  
46  
47

48  
49 Problematic patterns of CNSD use may derive from different underlying factors.  
50  
51 Overprescribing is often unintentional, due to lenient prescribing or unawareness among prescribers  
52  
53 about the uncertainty of long-term efficacy of CNSDs.<sup>27 28</sup> Another factor may be the failure to  
54  
55 recognize at-risk patients, which may be a consequence of lacking validated instruments. Apart  
56  
57 from this, doctor-patient communication may also play a role. Messages on the importance of  
58  
59 adherence in order to avoid harmful effects of medication overuse, for instance, may not be  
60

1 conveyed effectively to older patients. For the older patient counterpart, potential barriers in  
2 understanding and adhering to medical advice may include cognitive impairment, low health  
3 literacy and lack of family/social support.<sup>29 30</sup> Furthermore, older patients may hold opposing  
4 attitudes regarding the discontinuation of CNSD use,<sup>31</sup> if adverse effects are under-emphasized and  
5 hopes of attaining freedom from unnecessary pain, anxiety and sleep disturbances in old age based  
6 only on medications are over-stated. Physicians may also experience other challenges in managing  
7 CNSD use.<sup>32</sup> Both the magnitude and impacts of such underlying factors on the prolonged use of  
8 CNSD in older patients remain poorly understood, and should therefore be elaborated in future  
9 research.

10  
11 Also of note, we found that the concurrent use of CNSDs significantly increased the odds  
12 for misuse or dependence in older patients, even adjusted for patients' socio-demographic  
13 background and clinically important covariates such as duration of CNSD use and intensity of pain,  
14 anxiety and depressive symptoms (Table 3). This finding suggests that co-prescribing of CNSDs for  
15 older patients should be done with great care. Moreover, the present study points out significant  
16 associations between polypharmacy and CNSD prolonged use, misuse and dependence in older  
17 patients. This, to our knowledge, has not been explored by previous research. Such associations can  
18 be explained by several factors. Studies suggest that polypharmacy is associated with the co-  
19 occurrence of anxiety, sleep difficulties and discomforts,<sup>33-35</sup> and might through unknown side-  
20 effects aggravate these conditions, in turn leading to more CNSDs being prescribed for symptom  
21 relief.

22  
23 Pertaining to our finding that living alone in old age is not associated with medication  
24 prolonged use and misuse or dependence, previous research yielded inconsistent results. Some  
25 reported that older adults who lived alone had significantly poorer sleep quality and tended to use  
26 more hypnotic drugs<sup>36 37</sup> whereas others claimed that living alone is not associated with or even  
27 reduced the risk of long-term use of benzodiazepine and z-hypnotics.<sup>38 39</sup> The issue clearly deserves  
28 further focus.

1  
2 Finally, we found that pain intensity has a highly significant relationship with both  
3  
4 prolonged use and misuse or dependence. This may suggest that pain intensity drives problematic  
5  
6 use of CNSDs. However, another possibility is that prolonged opioid use does not contribute to  
7  
8 improving pain. That opioid-induced hyperalgesia may worsen pain is well-known among younger  
9  
10 chronic opioid users.<sup>40 41</sup> However, whether pain may indeed be worsened also by prolonged CNSD  
11  
12 use among older patients, remains to be studied. Notably, anxiety and depression, known to be  
13  
14 associated with pain intensity, were not, in our study, associated with prolonged CNSD use and  
15  
16 misuse or dependence, even though they were reported to be common among chronic z-hypnotics  
17  
18 users (the major medication used in our sample).<sup>42 43</sup> The interrelationship between pain, anxiety  
19  
20 and depression is complex.<sup>44</sup> Future prospective studies over time are therefore needed to explain  
21  
22 the interplay between these entities and their influences on CNSD dependence.  
23  
24  
25  
26

27 In conclusions, CNSD overuse (prolonged use, misuse and dependence) is still prevalent  
28  
29 among hospitalized older patients, despite clear guidelines and recommendations. This raises a  
30  
31 concern about an increasing incidence and consequences among elderly. Sociodemographic, clinical  
32  
33 and pharmacological profiles of at-risk patients and significant associations identified in this study  
34  
35 can be used to inform ways for implementing future research initiatives and interventions aiming at  
36  
37 early detection, prevention and treatment for CNSD overuse among older patients.  
38  
39  
40  
41  
42  
43  
44  
45  
46  
47  
48  
49  
50  
51  
52  
53  
54  
55  
56  
57  
58  
59  
60

## **Acknowledgements**

We express our appreciation to all participants for spending their time and effort on this study. We are thankful to all medical staff at the three departments of Akershus University Hospital (Geriatrics, Neurology and Endocrinology) for facilitating the data collection process. We also gratefully acknowledge the statistical support of Professor Jurate Š. Benth.

## **Funding**

This study was funded by a grant from the Norwegian Research Council (Project number 256431), the University of Oslo and the Health Services Research Unit of the Akershus University Hospital. The funders had no role in study design, data collection and analysis, decision to publish or preparation of the manuscript.

## **Authors' contributions**

CL conceptualized, designed and led the study. SC, ESK and CL drafted the study protocol. SC customized the protocol, recruited participants, collected and analyzed data, and drafted this manuscript. TGS was involved in the recruitment and data collection process. MG contributed to the study conception and design. All authors took part in project planning and were involved in the refinement and approval of the final version of this manuscript.

## **Conflicts of interest**

In addition to the funding given above, Dr. Lundqvist reports having received research grants from the South-East Regional Health authority, during the conduct of the study as well as grants and personal fees from Abbvie pharma AS and Roche Norway AS, outside this submitted work. These funders have no role in study design, data collection and analysis, decision to publish or preparation of the manuscript. Other authors declared no conflicts of interest.

## **Patient consent for publication**

Not required.

1  
2  
3  
4  
5  
6  
7  
8  
9  
10  
11  
12  
13  
14  
15  
16  
17  
18  
19  
20  
21  
22  
23  
24  
25  
26  
27  
28  
29  
30  
31  
32  
33  
34  
35  
36  
37  
38  
39  
40  
41  
42  
43  
44  
45  
46  
47  
48  
49  
50  
51  
52  
53  
54  
55  
56  
57  
58  
59  
60**Ethics**

Ethical approval was obtained from the Regional Committee for Medical Research Ethics – South East Norway (Reference number: 2016/2289/REK sør-øst) and the Data Protection Office at Akershus University Hospital (Reference number: 17-054). All participants provided written informed consents. Data handling was done accordingly.

**Data sharing statement**

The datasets analyzed during this study are not publicly available due to threats to subject privacy but are available from the corresponding author on reasonable request.

For peer review only

## REFERENCES

1. World Health Organization. Lexicon of alcohol and drug terms. Geneva: World Health Organization;1994.
2. Del Carmen Panini A, Teves MR, Giraudo E, et al. Psychotropic Medication Use in the Elderly. In: Gargiulo PÁ, Mesones-Arroyo HL, eds. Psychiatry and Neuroscience Update - Vol II: A Translational Approach. Cham: Springer International Publishing, 2017:293-306.
3. Chu LF, Angst MS, Clark D. Opioid-induced hyperalgesia in humans: molecular mechanisms and clinical considerations. *The Clinical journal of pain* 2008;**24**(6):479-96.
4. Berg C, Blix HS, Fenne O, Furu K, Hjellvik V, Husabø KJ, et al. Drug use in the elderly. Norwegian Prescription Database 2013–2017. Oslo: Norwegian Institute of Public Health; 2018.
5. Kann IC, Lundqvist C, Lurås H. Prescription of addictive and non-addictive drugs to home-dwelling elderly. *Drugs & aging* 2014;**31**(6):453-59.
6. Sundseth AC, Gjelstad S, Straand J, et al. General practitioners' prescriptions of benzodiazepines, Z-hypnotics and opioid analgesics for elderly patients during direct and indirect contacts. A cross-sectional, observational study. *Scandinavian journal of primary health care* 2018;**36**(2):115-22.
7. Cheng S, Siddiqui TG, Gossop M, Kristoffersen ES, Lundqvist C. The severity of dependence scale detects medication misuse and dependence among older hospitalized patients. Revised manuscript submitted to *BMC Geriatrics*. 2019
8. Heider D, Matschinger H, Meid AD, et al. Health service use, costs, and adverse events associated with potentially inappropriate medication in old age in Germany: retrospective matched cohort study. *Drugs & aging* 2017;**34**(4):289-301.
9. Levesque A, Nunes EV. Addiction in the Older Patient. *Recognizing Addiction in Older Patients*, 2016.
10. Karlawish J. Measuring decision-making capacity in cognitively impaired individuals. *Neurosignals*. 2008;**16**(1):91-8.
11. Folstein MF, Folstein SE, McHugh PR. "Mini-mental state". A practical method for grading the cognitive state of patients for the clinician. *Journal of psychiatric research*. 1975 Nov;**12**(3):189-98.
12. Helvik AS, Engedal K, Skancke RH, et al. A psychometric evaluation of the Hospital Anxiety and Depression Scale for the medically hospitalized elderly. *Nordic journal of psychiatry* 2011;**65**(5):338-44.
13. Djukanovic I, Carlsson J, Arestedt K. Is the Hospital Anxiety and Depression Scale (HADS) a valid measure in a general population 65-80 years old? A psychometric evaluation study. *Health Qual Life Outcomes* 2017;**15**(1):193.
14. Bell ML, Fairclough DL, Fiero MH, et al. Handling missing items in the Hospital Anxiety and Depression Scale (HADS): a simulation study. *BMC research notes* 2016;**9**(1):479-79.

- 1  
2 15. Ashton H. Guidelines for the rational use of benzodiazepines. When and what to use. *Drugs*  
3 1994;**48**(1):25-40.  
4
- 5  
6 16. Sakshaug S, Handal M, Hjellvik V, et al. Long-term Use of Z-Hypnotics and Co-medication  
7 with Benzodiazepines and Opioids. *Basic & clinical pharmacology & toxicology* 2017;**120**(3):292-  
8 98.  
9
- 10  
11 17. Mordal J, Gundersen Ø, Bramness JG. Norwegian version of the Mini-International  
12 Neuropsychiatric Interview: Feasibility, acceptability and test-retest reliability in an acute  
13 psychiatric ward. *European Psychiatry* 2010;**25**(3):172-77.  
14
- 15  
16 18. American Psychiatric Association. Diagnostic and statistical manual of mental disorders, fourth  
17 edition. Washington, DC: American Psychiatric Association; 1994.  
18
- 19  
20 19. Gnjidic D, Hilmer SN, Blyth FM, et al. Polypharmacy cutoff and outcomes: five or more  
21 medicines were used to identify community-dwelling older men at risk of different adverse  
22 outcomes. *Journal of clinical epidemiology* 2012;**65**(9):989-95.  
23
- 24  
25 20. StataCorp LP. Stata base reference manual release 13. College Station, Texas: Stata  
26 Press;2013.p 2222-31  
27
- 28  
29 21. Helsedirektoratet. Nasjonal faglig veileder vanedannende legemidler - rekvirering og  
30 forsvarlighet. [National guidelines - addictive drugs]. The Norwegian Directorate of Health; 2015.  
31
- 32  
33 22. Helsedirektoratet. Nasjonal faglig veileder for bruk av opioider - ved langvarige ikke-  
34 krefrelaterede smerter. [National guidelines for the use of opioids]. The Norwegian Directorate of  
35 Health; 2016.  
36
- 37  
38 23. Hernandez I, He M, Brooks MM, et al. Exposure-Response Association Between Concurrent  
39 Opioid and Benzodiazepine Use and Risk of Opioid-Related Overdose in Medicare Part D  
40 Beneficiaries. *JAMA Network Open* 2018;**1**(2):e180919-e19.  
41
- 42  
43 24. Sun EC, Dixit A, Humphreys K, et al. Association between concurrent use of prescription  
44 opioids and benzodiazepines and overdose: retrospective analysis. *bmj* 2017;**356**:j760.  
45
- 46  
47 25. Garg RK, Fulton-Kehoe D, Franklin GM. Patterns of opioid use and risk of opioid overdose  
48 death among Medicaid patients. *Medical care* 2017;**55**(7):661-68.  
49
- 50  
51 26. Neutel CI, Skurtveit S, Berg C. Benzodiazepine and z-hypnotic use in Norwegian elderly, aged  
52 65-79. *Norsk epidemiologi* 2012;**22**(2).  
53
- 54  
55 27. Cook JM, Marshall R, Masci C, et al. Physicians' perspectives on prescribing benzodiazepines  
56 for older adults: a qualitative study. *J Gen Intern Med* 2007;**22**(3):303-7.  
57
- 58  
59 28. Kolodny A, Courtwright DT, Hwang CS, et al. The prescription opioid and heroin crisis: a  
60 public health approach to an epidemic of addiction. *Annual review of public health* 2015;**36**:559-74.  
61
- 62  
63 29. Ha JF, Longnecker N. Doctor-patient communication: a review. *The Ochsner Journal*  
64 2010;**10**(1):38-43.  
65  
66

- 1  
2 30. Kvarnström K, Airaksinen M, Liira H. Barriers and facilitators to medication adherence: a  
3 qualitative study with general practitioners. *BMJ open* 2018;**8**(1):e015332.  
4
- 5 31. Cook JM, Biyanova T, Masci C, et al. Older patient perspectives on long-term anxiolytic  
6 benzodiazepine use and discontinuation: a qualitative study. *Journal of General Internal Medicine*  
7 2007;**22**(8):1094-100.  
8
- 9 32. Sirdifield C, Anthierens S, Creupelandt H, et al. General practitioners' experiences and  
10 perceptions of benzodiazepine prescribing: systematic review and meta-synthesis. *BMC family*  
11 *practice* 2013;**14**(1):191.  
12
- 13 33. Wongpakaran N, Wongpakaran T, Sirirak T, et al. Predictors of polypharmacy among elderly  
14 Thais with depressive and anxiety disorders: findings from the DAS study. *BMC geriatrics*  
15 2018;**18**(1):309.  
16
- 17 34. Ancoli-Israel S, Shochat T. Chapter 135 - Insomnia in Older Adults A2 - Kryger, Meir H. In:  
18 Roth T, Dement WC, eds. *Principles and Practice of Sleep Medicine (Fifth Edition)*. Philadelphia:  
19 W.B. Saunders, 2011:1544-50.  
20
- 21 35. Rambhade S, Chakarborty A, Shrivastava A, et al. A survey on polypharmacy and use of  
22 inappropriate medications. *Toxicology international* 2012;**19**(1):68.  
23
- 24 36. Kawamoto R, Yoshida O, Oka Y, et al. Risk factors for insomnia in community-dwelling older  
25 persons. *Geriatrics & Gerontology International* 2004;**4**(3):163-68.  
26
- 27 37. Hägg M, Houston B, Elmståhl S, et al. Sleep quality, use of hypnotics and sleeping habits in  
28 different age-groups among older people. *Scandinavian journal of caring sciences* 2014;**28**(4):842-  
29 51.  
30
- 31 38. Mokhar A, Tillenburg N, Dirmaier J, et al. Potentially inappropriate use of benzodiazepines and  
32 z-drugs in the older population-analysis of associations between long-term use and patient-related  
33 factors. *PeerJ* 2018;**6**:e4614-e14.  
34
- 35 39. Luijendijk HJ, Tiemeier H, Hofman A, et al. Determinants of chronic benzodiazepine use in the  
36 elderly: A longitudinal study. *British Journal of Clinical Pharmacology* 2008;**65**(4):593-99.  
37
- 38 40. Rosenblum A, Marsch LA, Joseph H, et al. Opioids and the treatment of chronic pain:  
39 controversies, current status, and future directions. *Experimental and clinical psychopharmacology*  
40 2008;**16**(5):405-16.  
41
- 42 41. Lee M, Silverman SM, Hansen H, et al. A comprehensive review of opioid-induced  
43 hyperalgesia. *Pain Physician* 2011;**14**(2):145-61.  
44
- 45 42. Omvik S, Nordhus IH. Sleep and sleep disorders in chronic users of zopiclone and drug-free  
46 insomniacs. *Journal of Clinical Sleep Medicine* 2009;**5**(04):349-54.  
47
- 48 43. Kripke DF. Greater incidence of depression with hypnotic use than with placebo. *BMC*  
49 *Psychiatry* 2007;**7**(1):42.  
50
- 51 44. Bair MJ, Wu J, Damush TM, et al. Association of depression and anxiety alone and in  
52 combination with chronic musculoskeletal pain in primary care patients. *Psychosomatic medicine*  
53 2008;**70**(8):890-97.  
54  
55  
56  
57  
58  
59  
60



**Figure 1.** Flow of participants through the study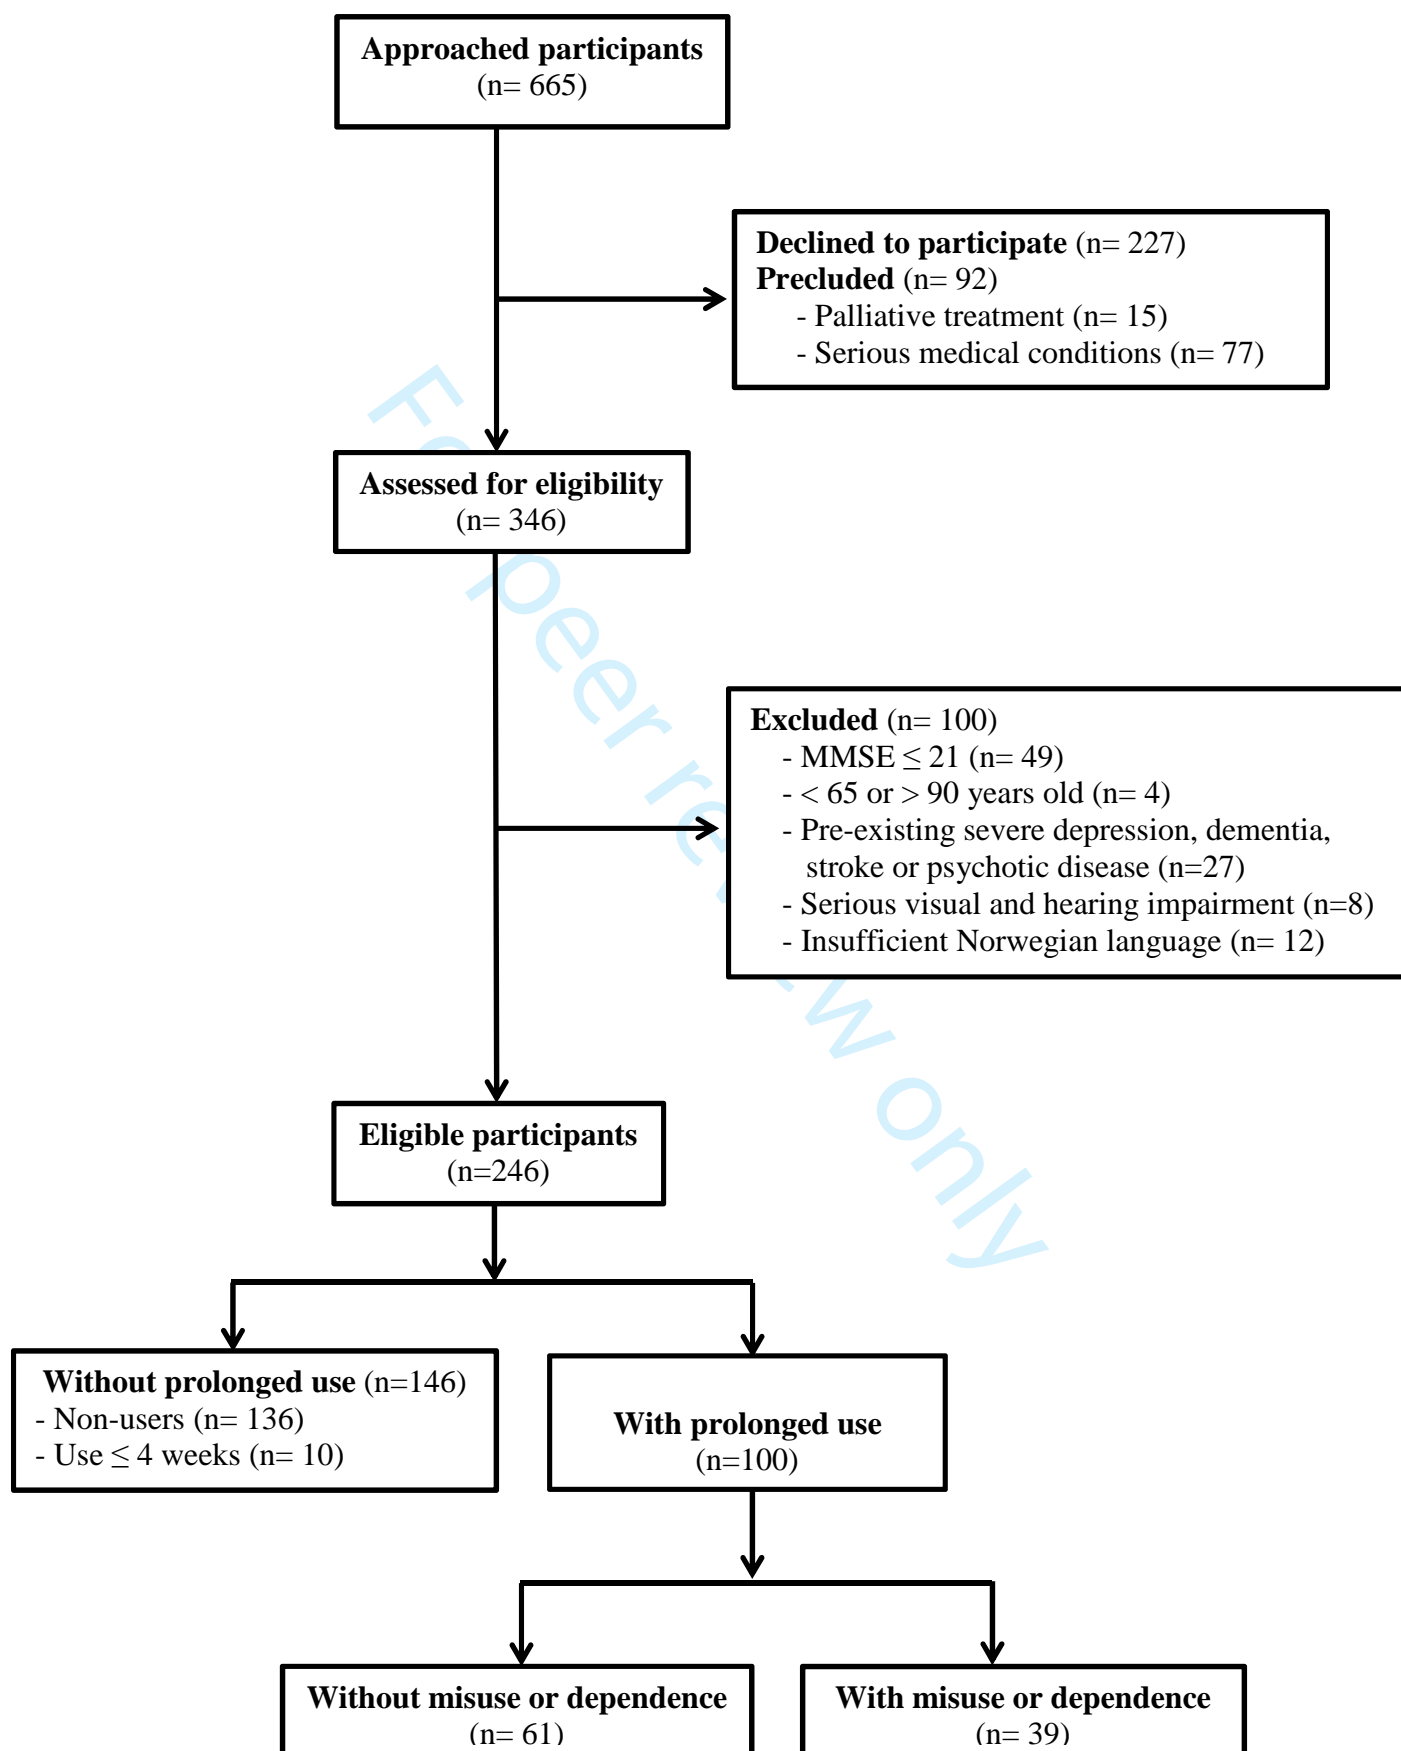

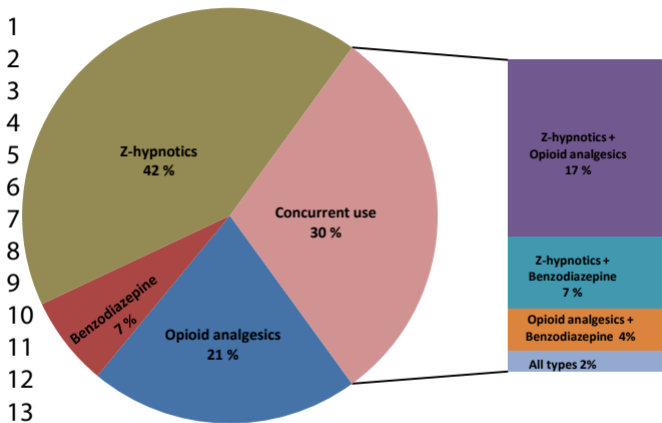

**Figure 2.** Proportion of prolonged users of CNSDs across medication groups. Of the 100 prolonged users, 70% used opioid analgesics (21%), benzodiazepines (7%) and z-hypnotics (42%) exclusively. The remaining 30% concurrently used one or more different types of CNSDs: z-hypnotics + opioid analgesics (17%), z-hypnotics + benzodiazepines (7%), opioid analgesics + benzodiazepines (4%), z-hypnotics + benzodiazepines + opioid analgesics (2%).

**Appendix 1.** Sensitivity analysis for factor associated with prolonged use of CNSDs –  
Logistic regression models, estimated using complete case analysis

| Independent variable                                | Bivariate         |                  | Multivariate        |                  |
|-----------------------------------------------------|-------------------|------------------|---------------------|------------------|
|                                                     | OR (95%CI)        | P-value          | Adjusted OR (95%CI) | P-value          |
| <b>Sex</b>                                          |                   |                  |                     |                  |
| Male                                                | 1                 |                  | 1                   |                  |
| Female                                              | 2.05 (1.21-3.47)  | <b>0.007</b>     | 1.64 (0.77-3.50)    | 0.20             |
| <b>Age groups, years</b>                            |                   |                  |                     |                  |
| 65-74                                               | 1                 |                  | 1                   |                  |
| 75-84                                               | 2.25 (1.27-4.00)  | <b>0.006</b>     | 2.31 (1.07-5.01)    | <b>0.03</b>      |
| ≥ 85                                                | 3.91 (1.75-8.74)  | <b>0.001</b>     | 3.52 (1.11-11.20)   | <b>0.03</b>      |
| <b>Education, years</b>                             |                   |                  |                     |                  |
| Basic education (≤ 10)                              | 1                 |                  | 1                   |                  |
| Secondary education (11-13)                         | 0.26 (0.12-0.54)  | <b>&lt;0.001</b> | 0.35 (0.13-0.97)    | <b>0.04</b>      |
| Higher education (≥ 14)                             | 0.30 (0.14-0.64)  | <b>0.002</b>     | 0.41 (0.15-1.14)    | 0.09             |
| <b>Income (NOK/year)</b>                            |                   |                  |                     |                  |
| < 200 000                                           | 1                 |                  | 1                   |                  |
| 200 000 – 349 000                                   | 0.63 (0.24-1.68)  | 0.36             | 0.48 (0.14-1.67)    | 0.25             |
| ≥ 350 000                                           | 0.25 (0.09-0.66)  | <b>0.005</b>     | 0.18 (0.05-0.69)    | <b>0.01</b>      |
| <b>Living alone</b>                                 |                   |                  |                     |                  |
| No                                                  | 1                 |                  | 1                   |                  |
| Yes                                                 | 1.80 (1.08-3.01)  | <b>0.03</b>      | 0.56 (0.25-1.27)    | 0.17             |
| <b>Polypharmacy (≥ 5 drugs/day)</b>                 |                   |                  |                     |                  |
| No                                                  | 1                 |                  | 1                   |                  |
| Yes                                                 | 6.95 (3.13-15.41) | <b>&lt;0.001</b> | 4.64 (1.73-12.48)   | <b>0.002</b>     |
| <b>Anxiety scores (HADS-A)</b>                      | 1.07 (0.99-1.15)  | 0.08             | 1.04 (0.92-1.17)    | 0.54             |
| <b>Depression scores (HADS-D)</b>                   | 1.15 (1.06-1.26)  | <b>0.001</b>     | 1.08 (0.95-1.23)    | 0.23             |
| <b>Pain intensity</b><br>(millimeters on VAS scale) | 1.02 (1.01-1.03)  | <b>&lt;0.001</b> | 1.03 (1.01-1.04)    | <b>&lt;0.001</b> |

Abbreviations:

CNSD – central nervous system depressant drugs

HADS–D/A – hospital anxiety and depression scale, depression or anxiety subscore.

**Appendix 2.** Sensitivity analysis for factors associated with CNSD misuse or dependence –  
Logistic regression models, estimated using complete case analysis

| Independent variable                                                              | Bivariate         |              | Multivariate        |              |
|-----------------------------------------------------------------------------------|-------------------|--------------|---------------------|--------------|
|                                                                                   | OR (95%CI)        | P-value      | Adjusted OR (95%CI) | P-value      |
| <b>Sex</b>                                                                        |                   |              |                     |              |
| Male                                                                              | 1                 |              | 1                   |              |
| Female                                                                            | 1.54 (0.65-3.67)  | 0.33         | 1.50 (0.43-5.25)    | 0.52         |
| <b>Age, years</b>                                                                 |                   |              |                     |              |
| 65-74                                                                             | 1                 |              | 1                   |              |
| 75-84                                                                             | 0.90 (0.34-2.37)  | 0.83         | 1.46 (0.36-5.96)    | 0.60         |
| ≥ 85                                                                              | 2.40 (0.75-7.65)  | 0.14         | 3.33 (0.55-20.16)   | 0.19         |
| <b>Education, years</b>                                                           |                   |              |                     |              |
| Basic education (≤10)                                                             | 1                 |              | 1                   |              |
| Secondary education (11-13)                                                       | 0.62 (0.22-1.77)  | 0.37         | 0.96 (0.20-4.60)    | 0.96         |
| Higher education (≥14)                                                            | 0.85 (0.31-2.32)  | 0.75         | 0.94 (0.22-3.99)    | 0.93         |
| <b>Income (NOK/year)</b>                                                          |                   |              |                     |              |
| < 200 000                                                                         | 1                 |              | 1                   |              |
| 200 000 – 349 000                                                                 | 0.92 (0.27-3.21)  | 0.90         | 1.67 (0.28-9.95)    | 0.57         |
| ≥ 350 000                                                                         | 0.44 (0.11-1.73)  | 0.24         | 0.83 (0.10-6.94)    | 0.86         |
| <b>Living alone</b>                                                               |                   |              |                     |              |
| No                                                                                | 1                 |              | 1                   |              |
| Yes                                                                               | 2.65 (1.14-6.18)  | <b>0.02</b>  | 2.24 (0.53-9.44)    | 0.27         |
| <b>Polypharmacy (≥ 5 drugs/day)</b>                                               |                   |              |                     |              |
| No                                                                                | 1                 |              | 1                   |              |
| Yes                                                                               | 2.02 (0.39-10.55) | 0.41         | 1.74 (0.14-21.22)   | 0.66         |
| <b>Concurrent use</b>                                                             |                   |              |                     |              |
| No (exclusive use)                                                                | 1                 |              | 1                   |              |
| Yes                                                                               | 3.5 (1.44-8.54)   | <b>0.006</b> | 8.77 (2.19-35.10)   | <b>0.002</b> |
| <b>Duration of CNSD use (weeks)</b>                                               | 1.00 (0.99-1.00)  | 0.94         | 1.00 (0.99-1.01)    | 0.11         |
| <b>Anxiety scores (HADS-A)</b>                                                    | 1.08(0.97-1.21)   | 0.15         | 1.01 (0.82-1.25)    | 0.94         |
| <b>Depression scores (HADS-D)</b>                                                 | 1.05 (0.93-1.19)  | 0.42         | 1.01 (0.81-1.27)    | 0.92         |
| <b>Pain intensity (millimeters, VAS scale)</b>                                    | 1.01 (0.99-1.03)  | 0.08         | 1.03 (1.01-1.06)    | <b>0.009</b> |
| Abbreviations:                                                                    |                   |              |                     |              |
| CNSD – central nervous system depressant drugs                                    |                   |              |                     |              |
| HADS–D/A – hospital anxiety and depression scale, depression or anxiety subscore. |                   |              |                     |              |

1  
2  
3  
4  
5  
6  
7  
8  
9  
10  
11  
12  
13  
14  
15  
16  
17  
18  
19  
20  
21  
22  
23  
24  
25  
26  
27  
28  
29  
30  
31  
32  
33  
34  
35  
36  
37  
38  
39  
40  
41  
42  
43  
44  
45  
46  
47  
48  
49  
50  
51  
52  
53  
54  
55  
56  
57  
58  
59  
60STROBE Statement—Checklist of items that should be included in reports of *cross-sectional studies*

|                              | Item No | Recommendation                                                                                                                                                                                    | Reported on page # |
|------------------------------|---------|---------------------------------------------------------------------------------------------------------------------------------------------------------------------------------------------------|--------------------|
| <b>Title and abstract</b>    | 1       | (a) Indicate the study's design with a commonly used term in the title or the abstract                                                                                                            | 1                  |
|                              |         | (b) Provide in the abstract an informative and balanced summary of what was done and what was found                                                                                               | 2-3                |
| <b>Introduction</b>          |         |                                                                                                                                                                                                   |                    |
| Background/rationale         | 2       | Explain the scientific background and rationale for the investigation being reported                                                                                                              | 4-5                |
| Objectives                   | 3       | State specific objectives, including any prespecified hypotheses                                                                                                                                  | 5                  |
| <b>Methods</b>               |         |                                                                                                                                                                                                   |                    |
| Study design                 | 4       | Present key elements of study design early in the paper                                                                                                                                           | 5                  |
| Setting                      | 5       | Describe the setting, locations, and relevant dates, including periods of recruitment, exposure, follow-up, and data collection                                                                   | 5-6                |
| Participants                 | 6       | (a) Give the eligibility criteria, and the sources and methods of selection of participants                                                                                                       | 5-6                |
| Variables                    | 7       | Clearly define all outcomes, exposures, predictors, potential confounders, and effect modifiers. Give diagnostic criteria, if applicable                                                          | 6-7                |
| Data sources/<br>measurement | 8*      | For each variable of interest, give sources of data and details of methods of assessment (measurement). Describe comparability of assessment methods if there is more than one group              | 6-7                |
| Bias                         | 9       | Describe any efforts to address potential sources of bias                                                                                                                                         | 6-8                |
| Study size                   | 10      | Explain how the study size was arrived at                                                                                                                                                         | 8                  |
| Quantitative variables       | 11      | Explain how quantitative variables were handled in the analyses. If applicable, describe which groupings were chosen and why                                                                      | 6-8                |
| Statistical methods          | 12      | (a) Describe all statistical methods, including those used to control for confounding                                                                                                             | 7-8                |
|                              |         | (b) Describe any methods used to examine subgroups and interactions                                                                                                                               | 7-8                |
|                              |         | (c) Explain how missing data were addressed                                                                                                                                                       | 8                  |
|                              |         | (d) If applicable, describe analytical methods taking account of sampling strategy                                                                                                                | N/A                |
|                              |         | (e) Describe any sensitivity analyses                                                                                                                                                             | 8                  |
| <b>Results</b>               |         |                                                                                                                                                                                                   |                    |
| Participants                 | 13*     | (a) Report numbers of individuals at each stage of study—eg numbers potentially eligible, examined for eligibility, confirmed eligible, included in the study, completing follow-up, and analysed | 8                  |
|                              |         | (b) Give reasons for non-participation at each stage                                                                                                                                              | 8                  |
|                              |         | (c) Consider use of a flow diagram                                                                                                                                                                | 8                  |
| Descriptive data             | 14*     | (a) Give characteristics of study participants (eg demographic, clinical, social)                                                                                                                 | 9-10               |

|                          |     |                                                                                                                                                                                                              |       |
|--------------------------|-----|--------------------------------------------------------------------------------------------------------------------------------------------------------------------------------------------------------------|-------|
|                          |     | and information on exposures and potential confounders                                                                                                                                                       |       |
|                          |     | (b) Indicate number of participants with missing data for each variable of interest                                                                                                                          | 9     |
| Outcome data             | 15* | Report numbers of outcome events or summary measures                                                                                                                                                         | 8-11  |
| Main results             | 16  | (a) Give unadjusted estimates and, if applicable, confounder-adjusted estimates and their precision (eg, 95% confidence interval). Make clear which confounders were adjusted for and why they were included | 11-13 |
|                          |     | (b) Report category boundaries when continuous variables were categorized                                                                                                                                    | 10-11 |
|                          |     | (c) If relevant, consider translating estimates of relative risk into absolute risk for a meaningful time period                                                                                             | N/A   |
| Other analyses           | 17  | Report other analyses done—eg analyses of subgroups and interactions, and sensitivity analyses                                                                                                               | 9-13  |
| <b>Discussion</b>        |     |                                                                                                                                                                                                              |       |
| Key results              | 18  | Summarise key results with reference to study objectives                                                                                                                                                     | 14    |
| Limitations              | 19  | Discuss limitations of the study, taking into account sources of potential bias or imprecision. Discuss both direction and magnitude of any potential bias                                                   | 14-15 |
| Interpretation           | 20  | Give a cautious overall interpretation of results considering objectives, limitations, multiplicity of analyses, results from similar studies, and other relevant evidence                                   | 15-17 |
| Generalisability         | 21  | Discuss the generalisability (external validity) of the study results                                                                                                                                        | 14-15 |
| <b>Other information</b> |     |                                                                                                                                                                                                              |       |
| Funding                  | 22  | Give the source of funding and the role of the funders for the present study and, if applicable, for the original study on which the present article is based                                                | 18    |

\*Give information separately for exposed and unexposed groups.

**Note:** An Explanation and Elaboration article discusses each checklist item and gives methodological background and published examples of transparent reporting. The STROBE checklist is best used in conjunction with this article (freely available on the Web sites of PLoS Medicine at <http://www.plosmedicine.org/>, Annals of Internal Medicine at <http://www.annals.org/>, and Epidemiology at <http://www.epidem.com/>). Information on the STROBE Initiative is available at [www.strobe-statement.org](http://www.strobe-statement.org).

# BMJ Open

## Sociodemographic, clinical and pharmacological profiles of medication misuse and dependence in hospitalized older patients: a prospective cross-sectional study

|                                 |                                                                                                                                                                                                                                                                                                                                                                                                                                                                                                                                                                                                                          |
|---------------------------------|--------------------------------------------------------------------------------------------------------------------------------------------------------------------------------------------------------------------------------------------------------------------------------------------------------------------------------------------------------------------------------------------------------------------------------------------------------------------------------------------------------------------------------------------------------------------------------------------------------------------------|
| Journal:                        | <i>BMJ Open</i>                                                                                                                                                                                                                                                                                                                                                                                                                                                                                                                                                                                                          |
| Manuscript ID                   | bmjopen-2019-031483.R1                                                                                                                                                                                                                                                                                                                                                                                                                                                                                                                                                                                                   |
| Article Type:                   | Research                                                                                                                                                                                                                                                                                                                                                                                                                                                                                                                                                                                                                 |
| Date Submitted by the Author:   | 31-Jul-2019                                                                                                                                                                                                                                                                                                                                                                                                                                                                                                                                                                                                              |
| Complete List of Authors:       | Cheng, Socheat; Akershus Univeristy Hospital, Health Services Research; University of Oslo, Institute of Clinical Medicine, Faculty of Medicine<br>Siddiqui,, Tahreem Ghazal; Akershus University Hospital, Health Services Research Unit<br>Gossop, Michael; University of Oslo, Centre for Addiction Research; National Addiction Centre,<br>Kristoffersen, Espen Saxhaug; University of Oslo, Department of General Practice, Institute of Health and Society<br>Lundqvist, Christofer; University of Oslo, Institute of Clinical Medicine, Campus Ahus; Akershus University Hospital, Health Service Research Centre |
| <b>Primary Subject Heading</b>: | Geriatric medicine                                                                                                                                                                                                                                                                                                                                                                                                                                                                                                                                                                                                       |
| Secondary Subject Heading:      | Addiction, Mental health, Patient-centred medicine, Pharmacology and therapeutics                                                                                                                                                                                                                                                                                                                                                                                                                                                                                                                                        |
| Keywords:                       | Characteristics, geriatric patients, risk factors, addiction, prescription drug abuse                                                                                                                                                                                                                                                                                                                                                                                                                                                                                                                                    |
|                                 |                                                                                                                                                                                                                                                                                                                                                                                                                                                                                                                                                                                                                          |

SCHOLARONE™  
Manuscripts

1  
2 1 **Sociodemographic, clinical and pharmacological profiles of medication misuse and**  
3 2 **dependence in hospitalized older patients: a prospective cross-sectional study**

4  
5 3  
6 4 **Socheat Cheng<sup>1,2</sup>, Tahreem Ghazal Siddiqui<sup>1,2</sup>, Michael Gossop<sup>3</sup>, Espen Saxhaug Kristoffersen<sup>1,4,5</sup>,**  
7 5 **Christofer Lundqvist<sup>1,2,4</sup>**  
8 6  
9 7

- 10 8 1. Health Services Research Unit, Akershus Univeristy Hospital, PO Box 1000, 1478  
11 9 Lorenskog, Norway  
12  
13 10 2. Institute of Clinical Medicine, Campus Ahus, Faculty of Medicine, University of Oslo, PO  
14 11 Box 1000, 1475 Lorenskog, Norway  
15  
16 12 3. National Addiction Centre, Institute of Psychiatry, Psychology and Neuroscience, King's  
17 13 College London, PO Box 48, 4 Windsor Walk, London SE5 8AF, UK  
18  
19 14 4. Department of Neurology, Akershus Univeristy Hospital, PO Box 1000, 1478 Lorenskog,  
20 15 Norway  
21  
22 16 5. Department of General Practice, Institute of Health and Society, University of Oslo, 1130  
23 17 Blindern 0318, Oslo, Norway  
24  
25  
26  
27  
28  
29  
30  
31  
32  
33

34 18 **Email address of each author:**

35 19 Socheat Cheng: Socheat.Cheng@ahus.no

36 20 Tahreem Ghazal Siddiqui: Tahreem.Ghazal.Siddiqui@ahus.no

37 21 Michael Gossop: michael.gossop@kcl.ac.uk

38 22 Espen Saxhaug Kristoffersen: e.s.kristoffersen@medisin.uio.no

39 23 Christofer Lundqvist: a.c.lundqvist@medisin.uio.no  
40  
41  
42  
43  
44  
45

46 25 **Corresponding author:**

47 26 Socheat Cheng,

48 27 Health Services Research Unit (HØKH),

49 28 Akershus University Hospital,

50 29 PO Box 1000,

51 30 1478 Lorenskog,

52 31 Norway

53 32 Tel: +47 679 687 09

54 33 E-mail: Socheat.Cheng@ahus.no  
55  
56  
57  
58  
59  
60



## 1 ABSTRACT

### 2 Objectives

3 Timely recognition of medication misuse and dependence is crucial to avoid both adverse drug  
4 events and increasing health expenditure. Yet, the detection of these disorders in older people  
5 remains challenging due to the paucity of evidence on characteristics of patients at risk. This study  
6 investigates sociodemographic, pharmacological and clinical characteristics and factors associated  
7 with prolonged medication use, misuse and dependence in hospitalized older patients, focusing on  
8 three commonly prescribed central nervous system depressants (CNSDs): opioid analgesics,  
9 benzodiazepines and z-hypnotics.

### 10 Design

11 A prospective cross-sectional study, complying with the Strengthening the Reporting of  
12 Observational Studies in Epidemiology (STROBE) guidelines

### 13 Setting

14 Somatic departments of the Akershus University Hospital, Norway

### 15 Participants

16 246 patients aged 65-90 were included.

### 17 Outcome measures

18 Prolonged use was defined as using CNSDs for  $\geq 4$  weeks. Misuse and dependence were assessed  
19 with DSM-IV criteria for substance abuse and dependence. We used descriptive statistics to report  
20 patients' characteristics and logistic regression to demonstrate factors associated with prolonged  
21 use, and misuse or dependence.

### 22 Results

23 Forty percent of participants reported using CNSDs for  $\geq 4$  weeks. Z-hypnotics were the most-  
24 commonly-used drugs. Prolonged users were more frequently female, aged 75-84, living alone, with  
25 lower socioeconomic status, polypharmacy, and higher pain intensity and depression scores. The

1 odds for prolonged use were higher among patients aged  $\geq 75$  and those with pain and  
2 polypharmacy, but lower among those who had completed secondary education, compared to the  
3 reference categories. In older patients, enhanced pain and concurrent use of  $\geq 2$  CNSDs increased  
4 the likelihood of misuse or dependence.

## 5 **Conclusion**

6 CNSD overuse is prevalent among hospitalized older patients, despite clear guidelines and  
7 recommendations. Our findings underline a need for stronger focus on responsible prescribing,  
8 timely detection and prevention of this issue, with special attention towards older patients, those  
9 with enhanced pain, polypharmacy and/or concurrent use of several CNSDs.

10  
11 **Key words:** characteristics, geriatric patients, risk factors, addiction, prescription drug abuse

12 **Trial registration:** ClinicalTrials.gov Identifier: NCT03162081. Registered 3 May 2017

## 13 14 **Strengths and limitations of this study**

- 15 • The first and comprehensive study of characteristics and factors associated with commonly  
16 prescribed central nervous system depressants (CNSDs) prolonged use, misuse, and  
17 dependence in older hospitalized patients.
- 18 • Characteristics of at-risk patients and significant associations revealed in this study can be  
19 used to inform ways for implementing future research initiatives and interventions aiming at  
20 early detection, prevention and treatment for CNSD overuse among older patients.
- 21 • We used validated and generally accepted diagnostic criteria to assess medication misuse  
22 and dependence in older patients (DSM-IV criteria for substance abuse and dependence)
- 23 • The use of cross-sectional data and a hospital-based sample precludes us from inferring  
24 causal relationships and generalizing the study findings to the general population.

## 1 INTRODUCTION

2 Central nervous system depressants (CNSDs) such as opioid analgesics, benzodiazepines and z-  
3 hypnotics are commonly prescribed among older patients for the treatment of chronic pain, anxiety  
4 and insomnia. While these medications are essential for moderate-severe cases, long-term use is not  
5 recommended owing to the risk of adverse events, including hyperalgesia, fractures, falls, cognitive  
6 impairment and dependence.<sup>1-3</sup> This underlines the importance of rational use and prescription of  
7 CNSDs for older patients. To achieve this, one of the practical steps is for clinicians to be able to  
8 timely recognize older patients at risk or suffering from medication misuse and dependence.

9 According to the Norwegian Prescription Database, the consumption of potentially addictive  
10 drugs such as opioid analgesics (i.e. oxycodone and tramadol), benzodiazepines (i.e. diazepam,  
11 oxazepam and nitrazepam) and z-hypnotics (i.e. zopiclone and zolpidem) is high among individuals  
12 aged 65 and older. These drugs were among the 30 most commonly prescribed drugs to older  
13 patients in Norway in 2017.<sup>4</sup>

14 A Norwegian study showed that the patients' regular general practitioners (GPs) prescribed  
15 the largest proportion of addictive drugs to their older patients (77%) compared to other groups of  
16 physicians.<sup>5</sup> In line with this, another study, found that CNSDs were frequently prescribed by GPs  
17 in large quantities and through indirect contacts without consultation.<sup>6</sup> Both inappropriate  
18 prescribing and the high consumption of such addictive medications may put older patients at risk  
19 of medication misuse and dependence – a condition characterized by persistent and compulsive use  
20 of a medication despite impairment in physical, social and psychological health.<sup>7</sup>

21 Given the vulnerability to serious adverse effects and interactions as a result of age-related  
22 changes in pharmacokinetics and pharmacodynamics, timely recognition and treatment of  
23 medication misuse and dependence in older patients are crucial to ensure medication safety and to  
24 avoid increasing health expenditure.<sup>8</sup> Yet, the detection of these disorders in older people is  
25 challenging and requires both valid screening tools and evidence-based knowledge on long-term use

1  
2 1 of CNSDs, including patients' characteristics related to misuse and dependence.<sup>7,9</sup> Addressing these  
3  
4 2 knowledge gaps forms the basis for developing evidence-based intervention.  
5

6 3 This study intends to provide such information by investigating sociodemographic,  
7  
8 4 pharmacological and clinical characteristics and factors associated with prolonged medication use,  
9  
10 5 misuse and dependence in hospitalized older patients, focusing on three commonly prescribed  
11  
12 6 central nervous system depressants (CNSDs): opioid analgesics, benzodiazepines and z-hypnotics.  
13  
14  
15  
16 7

## 18 8 **METHODS**

### 20 9 **Study design**

22 10 The study was a prospective cross-sectional, in-hospital study and complied with the Strengthening  
23  
24 11 the Reporting of Observational Studies in Epidemiology (STROBE) guidelines.  
25  
26

### 27 12 **Participants and setting**

29 13 The recruitment process took place between May 2017 and September 2018, at three somatic  
30  
31 14 departments of the Akershus University Hospital: Geriatrics, General Internal Medicine and  
32  
33 15 Neurology. The catchment area of the hospital covers roughly 10% of the total population of  
34  
35 16 Norway. Participants were recruited at the first few days of admission based on predefined  
36  
37 17 inclusion and exclusion criteria (NCT03162081), and not on their vulnerability, reasons for  
38  
39 18 admission, diagnosis or severity of disease. As Norway has an all-covering national health  
40  
41 19 insurance, all patients enter the hospital on the same conditions and with the same in-patient  
42  
43 20 threshold. The study inclusion criteria were hospitalized patients, aged between 65 and 90 years old.  
44  
45 21 The exclusion criteria included Mini-Mental State Examination (MMSE) score  $\leq 21$  (incapacity to  
46  
47 22 give informed consent);<sup>10,11</sup> pre-existing diagnosis of severe depression, stroke, dementia,  
48  
49 23 psychotic disorders; serious visual or hearing impairment; and insufficient Norwegian language, all  
50  
51 24 generally assumed to bias participants' responses on self-rated health questions. We precluded  
52  
53 25 participants who were in a too serious medical condition or palliative treatment, defined by  
54  
55 26 physicians at the study setting.  
56  
57  
58  
59  
60

## **Data collection**

Data collection (by SC, TGS and CL) involved three steps. After consent had been given, all eligible participants were asked to complete a questionnaire on sociodemographic background, pain, anxiety and depression. At this stage, the investigators were blinded to the use of medications as this was registered in the electronic patient record (EPR) which could only be accessed once a written informed consent had been obtained. Having fulfilled this requirement, the EPRs were reviewed to document the use of medications (type, duration, frequency and polypharmacy). Finally, the presence of medication misuse or dependence among participants identified as prolonged users of CNSDs was assessed through a structured interview. Prior to the start of the study, the three data collectors had gone through training sessions in order to optimize congruent use of the interview. More details on definition, data sources, and measurements for variables under investigations are given in the section below. The questionnaire and interview guide used to collect data from participants can be found in Additional file 1.

## **Sociodemographic and clinical variables**

Sociodemographic variables included age (65-74, 75-84, and  $\geq 85$ ); sex (Male, Female); education (basic, secondary, and higher education); annual income (<200 000, 200 000 – 349 000, and  $\geq 350 000$  Norwegian Krone (NOK) per year); and living alone (Yes, No). Clinical variables consisted of pain intensity (continuous, measured using visual analog scale - VAS); Anxiety and depressive symptoms were assessed with the Hospital Anxiety and Depression Scale (HADS). Optimal cut-off values for diagnosing anxiety and depression in older hospitalized patients using HADS remain to be established.<sup>12 13</sup> To avoid underestimation and misclassification bias of anxious and depressed individuals, we used anxiety and depression scores as continuous variables. Higher scores indicate higher levels of anxiety and depressive symptoms.<sup>14</sup> Data for all of these variables were collected through a self-completed questionnaire.

1  
2  
3  
4  
5  
6  
7  
8  
9  
10  
11  
12  
13  
14  
15  
16  
17  
18  
19  
20  
21  
22  
23  
24  
25  
26  
27  
28  
29  
30  
31  
32  
33  
34  
35  
36  
37  
38  
39  
40  
41  
42  
43  
44  
45  
46  
47  
48  
49  
50  
51  
52  
53  
54  
55  
56  
57  
58  
59  
60

## 1 **Pharmacological variables**

2 We defined prolonged use of CNSDs as the use of opioid analgesics, benzodiazepines and/or z-  
3 hypnotics for four weeks or longer continuously up to the point of recruitment,<sup>15 16</sup> while non-  
4 prolonged use was non-use or use of these medications for less than four weeks. Medication misuse  
5 and dependence were defined based on DSM-IV criteria for substance abuse and dependence,  
6 through structured interviews, using the Norwegian version of the Mini-International  
7 Neuropsychiatric Interview Guide – MINI.<sup>17</sup> Dependence was defined to be present if patients met  
8 three or more of the dependence criteria. Misuse was confirmed if the dependence criteria were not  
9 met and the respondents satisfied one or more of the abuse criteria.<sup>18</sup> For the purpose of the present  
10 study, and as few patients fulfilled misuse criteria (n=6), misuse and dependence were grouped  
11 together as medication misuse or dependence (n=39). Other pharmacological variables entailed  
12 types of CNSD medications used (categorized as exclusive or concurrent use), duration of use  
13 (continuous, in week); frequency of use (categorized as sporadic use if the medication was taken  
14 intermittently < 5 days per week and as daily use if the medication was taken  $\geq$  5 days per week);  
15 Polypharmacy<sup>19</sup> (defined as the use of  $\geq$ 5 medications daily, coded as Yes or No). The main source  
16 of pharmacological data was the EPR. We also sought to verify this against information from  
17 patients and GP referral documents. To ensure the accuracy of data on CNSD use patterns, we  
18 checked for evidence of use and consistency across prescriptions and relevant documents reported  
19 from both primary care and hospital settings.

## 21 **Statistical analysis**

22 We analyzed characteristics of older patients with and without prolonged use, and that of those with  
23 and without misuse or dependence using descriptive statistics. We assessed the associations  
24 between patient characteristics and the presence of prolonged CNSD use, and misuse or dependence  
25 using bivariate and multiple logistic regression analyses. The analyses included adjustment for  
26 sociodemographic subgroups (age groups, sex, education, annual income, living alone), clinical

1  
2 1 (pain intensity, anxiety and depression scores) and pharmacological variables (polypharmacy,  
3  
4 2 duration and concurrent use of CNSDs). Multiple imputations, under the missing at random  
5  
6 3 assumption, using chained equations (with 20 imputed data sets) were performed to handle missing  
7  
8 4 data. Sensitivity analyses were conducted for the same models using complete case analysis  
9  
10 5 (individuals with missing data are excluded). No multicollinearity was detected. Stata-SE software  
11  
12 6 version 15 was used for all statistical analyses.<sup>20</sup>  
13  
14  
15  
16 7

## 17 8 **Patient and public involvement**

18 9 A user advisory board established at the Akershus University Hospital (the study setting), which  
19  
20 10 included both representatives of older patients and health service officials, supported this study. The  
21  
22 11 board met on a regular basis throughout the study period. They provided project-specific inputs on  
23  
24 12 ethics, design and methodology as well as highlighted research focus based on patient and public  
25  
26 13 interests. They will also be involved in the dissemination of the findings.  
27  
28  
29  
30  
31  
32 14

## 33 15 **RESULTS**

### 34 16 **Participants**

35  
36 17 In total, we consecutively approached 665 adults aged 65-90. Of these, 227 participants declined to  
37  
38 18 participate, while 92 others were precluded due to either being in a too serious medical condition or  
39  
40 19 palliative treatment. Of the remaining patients, 100 were excluded based on predefined exclusion  
41  
42 20 criteria. This resulted in 246 older patients eligible for the study, of which 100 were thereafter  
43  
44 21 identified as prolonged users of CNSDs ( $\geq$  four weeks). Figure 1 provides more details on the flow  
45  
46 22 of participants through the study.  
47  
48  
49  
50  
51

52 23 There were no missing data in the variables: prolonged use, misuse or dependence,  
53  
54 24 concurrent use, duration of CNSD use, age groups, sex, living alone and polypharmacy. The  
55  
56 25 following variables had missing data: pain intensity 7% (18/246), anxiety scores 7% (17/246),  
57  
58 26 depression scores 7% (17/246), education 6% (14/246), and income 16% (39/246).  
59  
60

## 1 Descriptive data

2 Overall, in descriptive analyses, older patients with prolonged use of CNSDs were more often  
 3 female, aged 75-85, living alone, with lower socioeconomic status (completed  $\leq$  secondary  
 4 education and earned  $<$  350000 NOK/year), polypharmacy and accompanied by higher pain  
 5 intensity and depression scores (Table 1). Patients screening positive on misuse or dependence were  
 6 mainly those living alone (69%) and those on exclusive use of CNSDs (54%). More details on  
 7 patient characteristics are provided in Table 1.

8 **Table 1.** Patient characteristics

| Patient characteristics                             | Prolonged use of CNSDs |                | CNSD misuse or dependence |               |
|-----------------------------------------------------|------------------------|----------------|---------------------------|---------------|
|                                                     | No (n=146)             | Yes (n=100)    | No (n=61)                 | Yes (n=39)    |
| <b>Sex</b>                                          |                        |                |                           |               |
| Female                                              | 71 (49%)               | 66 (66%)       | 38 (62%)                  | 28 (72%)      |
| Male                                                | 75 (51%)               | 34 (34%)       | 23 (38%)                  | 11 (28%)      |
| <b>Age groups</b>                                   |                        |                |                           |               |
| 65-74                                               | 73 (50%)               | 28 (28%)       | 18 (29%)                  | 10 (25%)      |
| 75-84                                               | 59 (40%)               | 51 (51%)       | 34 (56%)                  | 17 (44%)      |
| $\geq$ 85                                           | 14 (10%)               | 21 (21%)       | 9 (15%)                   | 12 (31%)      |
| <b>Education, years</b>                             |                        |                |                           |               |
| Basic education ( $\leq$ 10)                        | 16 (12%)               | 30 (32%)       | 17 (29%)                  | 13 (36%)      |
| Secondary education (11-13)                         | 64 (46%)               | 31 (33%)       | 21 (36%)                  | 10 (28%)      |
| Higher education ( $\geq$ 14)                       | 58 (42%)               | 33 (35%)       | 20 (35%)                  | 13 (36%)      |
| <b>Income (NOK/year)</b>                            |                        |                |                           |               |
| $<$ 200 000                                         | 8 (7%)                 | 13 (15%)       | 7 (14%)                   | 6 (18%)       |
| 200 000–349 000                                     | 42 (34%)               | 43 (51%)       | 24 (46%)                  | 19 (58%)      |
| $\geq$ 350 000                                      | 72 (59%)               | 29 (34%)       | 21 (40%)                  | 8 (24%)       |
| <b>Living alone</b>                                 |                        |                |                           |               |
| No                                                  | 87 (60%)               | 45 (45%)       | 33 (54%)                  | 12 (31%)      |
| Yes                                                 | 59 (40%)               | 55 (55%)       | 28 (46%)                  | 27 (69%)      |
| <b>Polypharmacy (<math>\geq</math> 5 drugs/day)</b> |                        |                |                           |               |
| No                                                  | 55 (38%)               | 8 (8%)         | 6 (10%)                   | 2 (5%)        |
| Yes                                                 | 91 (62%)               | 92 (92%)       | 55 (90%)                  | 37 (95%)      |
| <b>Anxiety scores (HADS-A)</b>                      |                        |                |                           |               |
| Mean (SD)                                           | 4.13 (3.28)            | 4.97 (3.91)    | 4.47 (3.54)               | 5.68 (4.34)   |
| Median (Range)                                      | 4 (0-14)               | 4 (0-16)       | 4 (0-16)                  | 5 (0-15)      |
| <b>Depression scores (HADS-D)</b>                   |                        |                |                           |               |
| Mean (SD)                                           | 3.60 (2.98)            | 5.13 (3.49)    | 4.89 (3.26)               | 5.49 (3.81)   |
| Median (Range)                                      | 3 (0-13)               | 4 (0-15)       | 4 (0-12)                  | 5 (0-15)      |
| <b>Pain intensity</b><br>(millimeters on VAS scale) |                        |                |                           |               |
| Mean (SD)                                           | 18.07 (24.21)          | 35.20 (30.35)  | 30.56 (28.30)             | 42.08 (32.34) |
| Median (Range)                                      | 7 (0-91)               | 29.50 (0-97)   | 27 (0-97)                 | 48 (0-93)     |
| <b>Duration of CNSD use (weeks)</b>                 |                        |                |                           |               |
| Mean (SD)                                           | -                      | 71.47 (113.44) | 72.10 (138.38)            | 70.48 (57.36) |



|                                        |   |               |            |            |
|----------------------------------------|---|---------------|------------|------------|
| Median (Range)                         |   | 50.50 (4-988) | 33 (4-988) | 52 (4-232) |
| <b>Concurrent use (of &gt;1 CNSDs)</b> |   |               |            |            |
| No (exclusive use)                     | - | 70 (70%)      | 49 (80%)   | 21 (54%)   |
| Yes                                    | - | 30 (30%)      | 12 (20%)   | 18 (46%)   |

Abbreviations:

CNSD – central nervous system depressant drugs;

HADS–D/A – hospital anxiety and depression scale, depression or anxiety subscore.

1

## 2 Medication use patterns

3 Forty percent (100 out of 246 participants) of the older patients enrolled in this study were  
 4 identified as prolonged users ( $\geq 4$  weeks) of opioid analgesics, benzodiazepines and/or z-hypnotics.  
 5 The dominant group of medications was Z-hypnotics, accounting for 42% (42/100) as exclusive use  
 6 and 26% (26/100) as concurrent use of Z-hypnotics plus other CNSDs, followed by opioid  
 7 analgesics, which comprised 21% (21/100) as exclusive use and 23% (23/100) as concurrent use.  
 8 Benzodiazepines were less commonly used and constituted 7% (7/100) as exclusive use and 13%  
 9 (13/100) as concurrent use. 30% (30/100) of the prolonged users in our sample concurrently  
 10 consumed two or more different types of CNSDs. The most prevalent pattern of concurrent use was  
 11 the combination of z-hypnotics and opioid analgesics, amounting to 57% (17/30) of all forms of  
 12 current use.

13 The majority of older patients using CNSDs, did so on long-term and daily basis. The  
 14 medians for duration of use for opioid analgesics, benzodiazepines and z-hypnotics were 42 (4-  
 15 988), 51 (4-208) and 52 (4-232) weeks respectively. More than half of the prolonged users reported  
 16 using these medications daily (5-7 days per week): opioid analgesics (26/44), benzodiazepines  
 17 (15/20) and/or z-hypnotics (51/68).

18 Among all the prolonged users of CNSDs, 39% (39/100) met the DSM-IV criteria for  
 19 substance abuse or dependence. The non-mutually exclusive proportion of misuse or dependence  
 20 for opioid analgesics, benzodiazepines and z-hypnotics were 30% (13/44), 40% (8/20) and 41%  
 21 (28/68) respectively.

22

23

1

2

3

4

5

6

7

8

9

10

11

12

13

14

15

16

17

18

19

20

21

22

23

24

25

26

27

28

29

30

31

32

33

34

35

36

37

38

39

40

41

42

43

44

45

46

47

48

49

50

51

52

53

54

55

56

57

58

59

60

## 1 Factors associated with prolonged use of CNSDs

2 In the multivariate model, factors associated with increasing odds for prolonged use of CNSDs  
3 included being aged 75-84 (OR= 2.32, 95%CI: 1.16-4.65) and  $\geq 85$  years old (OR= 3.33, 95%CI:  
4 1.25-8.87) compared to age <75; having more intense pain according to the VAS scale (OR=1.02,  
5 95%CI: 1.01-1.04) and polypharmacy (OR=5.16, 95%CI: 2.13-12.55). On the contrary, the odds  
6 were lower among patients who had completed at least secondary education (OR= 0.33, 95%CI:  
7 0.13-0.83) compared to only basic education (Table 2). In the sensitivity analysis using complete  
8 case analysis, the associations between these factors and the prolonged use of CNSDs remained  
9 significant (Additional file 2). Sex, income, anxiety and depression scores were not significantly  
10 associated with prolonged use of CNSDs.

11 **Table 2.** Logistic regression models for factors associated with prolonged use of CNSDs –  
12 estimated using multiple imputations.

13

| Independent variable           | Bivariate model  |              | Multivariate model  |             |
|--------------------------------|------------------|--------------|---------------------|-------------|
|                                | OR (95%CI)       | P-value      | Adjusted OR (95%CI) | P-value     |
| <b>Sex</b>                     |                  |              |                     |             |
| Male                           | 1                |              | 1                   |             |
| Female                         | 2.05 (1.21-3.47) | <b>0.007</b> | 1.56 (0.80-3.02)    | 0.19        |
| <b>Age groups, years</b>       |                  |              |                     |             |
| 65-74                          | 1                |              | 1                   |             |
| 75-84                          | 2.25 (1.27-4.00) | <b>0.006</b> | 2.32 (1.16-4.65)    | <b>0.02</b> |
| $\geq 85$                      | 3.91 (1.75-8.74) | <b>0.001</b> | 3.33 (1.25-8.87)    | <b>0.02</b> |
| <b>Education, years</b>        |                  |              |                     |             |
| Basic education ( $\leq 10$ )  | 1                |              | 1                   |             |
| Secondary education (11-13)    | 0.29 (0.14-0.60) | <b>0.001</b> | 0.33 (0.13-0.83)    | <b>0.02</b> |
| Higher education ( $\geq 14$ ) | 0.34 (0.16-0.71) | <b>0.004</b> | 0.45 (0.18-1.12)    | 0.09        |
| <b>Income (NOK/year)</b>       |                  |              |                     |             |
| < 200 000                      | 1                |              | 1                   |             |
| 200 000 – 349 000              | 0.73 (0.27-1.93) | 0.52         | 0.67 (0.20-2.24)    | 0.52        |
| $\geq 350 000$                 | 0.33 (0.12-0.88) | <b>0.03</b>  | 0.35 (0.10-1.23)    | 0.10        |
| <b>Living alone</b>            |                  |              |                     |             |
| No                             | 1                |              | 1                   |             |
| Yes                            | 1.80 (1.08-3.01) | <b>0.03</b>  | 0.94 (0.47-1.88)    | 0.86        |

|                                                     |                   |                  |                   |                  |
|-----------------------------------------------------|-------------------|------------------|-------------------|------------------|
| <b>Polypharmacy (<math>\geq 5</math> drugs/day)</b> |                   |                  |                   |                  |
| No                                                  | 1                 |                  | 1                 |                  |
| Yes                                                 | 6.95 (3.13-15.41) | <b>&lt;0.001</b> | 5.16 (2.13-12.55) | <b>&lt;0.001</b> |
| <b>Anxiety scores (HADS-A)</b>                      | 1.06 (0.98-1.14)  | 0.14             | 1.01 (0.91-1.13)  | 0.80             |
| <b>Depression scores (HADS-D)</b>                   | 1.14 (1.05-1.24)  | <b>0.002</b>     | 1.08 (0.95-1.22)  | 0.21             |
| <b>Pain intensity (millimeters on VAS scale)</b>    | 1.02 (1.01-1.03)  | <b>&lt;0.001</b> | 1.02 (1.01-1.04)  | <b>&lt;0.001</b> |

Abbreviations:  
 CNSD – central nervous system depressant drugs  
 HADS–D/A – hospital anxiety and depression scale, depression or anxiety subscore.

**Factors associated with CNSD misuse or dependence**

Table 3 shows results of bivariate and multiple logistic regression analyses of factors associated with CNSD misuse or dependence, estimated using multiple imputations. We found that concurrent use of CNSDs and pain intensity had a significant association with misuse or dependence. In the multivariate model, we found that compared to exclusive use, concurrent use of two or more CNSDs increased the odds for misuse or dependence by 4 times (OR= 3.99, 95%CI: 1.34-11.88). Moreover, as pain intensity increased by 1 millimeter on 100 mm VAS scale, the odds for misuse or dependence increased by 1.02 units (OR= 1.02, 95%CI: 1.01-1.04). Sensitivity analysis using complete case analysis yield consistent results (Additional file 2).

**Table 3.** Logistic regression models for factors associated with CNSD misuse or dependence – estimated using multiple imputations.

| Independent variables         | Bivariate model  |         | Multivariate model  |         |
|-------------------------------|------------------|---------|---------------------|---------|
|                               | OR (95%CI)       | P-value | Adjusted OR (95%CI) | P-value |
| <b>Sex</b>                    |                  |         |                     |         |
| Male                          | 1                |         | 1                   |         |
| Female                        | 1.54 (0.65-3.67) | 0.33    | 1.13 (0.39-3.21)    | 0.83    |
| <b>Age, years</b>             |                  |         |                     |         |
| 65-74                         | 1                |         | 1                   |         |
| 75-84                         | 0.90 (0.34-2.37) | 0.83    | 1.37 (0.42-4.50)    | 0.60    |
| $\geq 85$                     | 2.40 (0.75-7.65) | 0.14    | 2.30 (0.56-9.45)    | 0.25    |
| <b>Education, years</b>       |                  |         |                     |         |
| Basic education ( $\leq 10$ ) | 1                |         | 1                   |         |
| Secondary education (11-13)   | 0.61 (0.22-1.72) | 0.35    | 0.84 (0.23-3.03)    | 0.78    |

|                                                     |                   |              |                   |             |
|-----------------------------------------------------|-------------------|--------------|-------------------|-------------|
| Higher education ( $\geq 14$ )                      | 0.86 (0.32-2.34)  | 0.77         | 1.09 (0.31-3.81)  | 0.89        |
| <b>Income (NOK/year)</b>                            |                   |              |                   |             |
| < 200 000                                           | 1                 |              | 1                 |             |
| 200 000 – 349 000                                   | 0.85 (0.24-2.98)  | 0.80         | 1.26 (0.26-6.26)  | 0.77        |
| $\geq 350 000$                                      | 0.49 (0.13-1.88)  | 0.30         | 0.73 (0.11-4.83)  | 0.75        |
| <b>Living alone</b>                                 |                   |              |                   |             |
| No                                                  | 1                 |              | 1                 |             |
| Yes                                                 | 2.65 (1.14-6.18)  | <b>0.02</b>  | 2.06 (0.65-6.48)  | 0.22        |
| <b>Polypharmacy (<math>\geq 5</math> drugs/day)</b> |                   |              |                   |             |
| No                                                  | 1                 |              | 1                 |             |
| Yes                                                 | 2.02 (0.39-10.55) | 0.41         | 1.88 (0.25-14.21) | 0.54        |
| <b>Concurrent use (of &gt;1 CNSDs)</b>              |                   |              |                   |             |
| No (exclusive use)                                  | 1                 |              | 1                 |             |
| Yes                                                 | 3.5 (1.44-8.54)   | <b>0.006</b> | 3.99 (1.34-11.88) | <b>0.01</b> |
| <b>Duration of CNSD use (weeks)</b>                 | 1.00 (0.99-1.00)  | 0.94         | 1.00 (0.99-1.00)  | 0.33        |
| <b>Anxiety scores (HADS-A)</b>                      | 1.08 (0.97-1.21)  | 0.14         | 1.06 (0.88-1.26)  | 0.55        |
| <b>Depression scores (HADS-D)</b>                   | 1.05 (0.93-1.19)  | 0.41         | 0.99 (0.81-1.20)  | 0.90        |
| <b>Pain intensity (millimeters, VAS scale)</b>      | 1.01 (0.99-1.03)  | 0.08         | 1.02 (1.01-1.04)  | <b>0.04</b> |

Abbreviations: CNSD – central nervous system depressant drugs; HADS–D/A – hospital anxiety and depression scale, depression or anxiety subscore.

## DISCUSSION

Our study shows that prolonged, concurrent and daily use of CNSDs is prevalent among hospitalized older patients. Z-hypnotics were the most commonly used drugs, both in exclusive and concurrent use patterns (with other CNSDs). In this particular group of patients, the presence of prolonged CNSD use was more common among patients with the following characteristics: being female, aged 75-84 years old, living alone, with lower socioeconomic status, polypharmacy, higher pain intensity and depression scores. Patients with misuse or dependence, according to DSM-IV criteria, were mainly those living alone and those on exclusive use of CNSDs. The odds for prolonged CNSD use were higher among patients aged  $\geq 75$  years old and those with higher pain intensity and polypharmacy. Having completed secondary education was protective against the

1  
2 1 prolonged use. In older patients, enhanced pain and concurrent use of  $\geq 2$  different types of CNSDs,  
3  
4 2 rather than the duration of use increased the likelihood of misuse or dependence.  
5

6 3 One of the strengths of this study is that it provides evidence on characteristics of older  
7  
8 4 patients with prolonged CNSD use, misuse, and dependence, from many different aspects  
9  
10 5 (sociodemographic, pharmacological and clinical profiles). We adhered strictly to the STROBE  
11  
12 6 reporting guidelines, ethical standards, and outcome measures were predefined (NCT03162081).  
13  
14 7 Moreover, we used validated and generally accepted criteria (DSM-IV criteria) to assess medication  
15  
16 8 misuse and dependence in older patients. Nonetheless, the study has some limitations. We  
17  
18 9 acknowledge that the use of a consecutive hospital-based sample represents a limitation regarding  
19  
20 10 generalizability of the study findings to the general population. However, our study should be  
21  
22 11 reasonably representative for somatic hospital populations of older people. We suggest that  
23  
24 12 hospitals may be good settings for conducting research on medication-related problems as they  
25  
26 13 represent settings where older patients often get their medication regimens changed and also where  
27  
28 14 they may therefore be at risk for adverse drug events and, consequently, where this focus is  
29  
30 15 important. Furthermore, it has recently been pointed out that long-term use of benzodiazepine/z-  
31  
32 16 hypnotics often started in hospitals and the prescription is continued by GPs.<sup>21</sup> Another issue, which  
33  
34 17 suggests some care in interpretation of our results, is the relatively high number of patients that  
35  
36 18 declined participation. It may be that those who declined represent either those with the most  
37  
38 19 serious medical conditions or those that were not interested in being queried regarding their  
39  
40 20 medication use, thus suggesting that our sample may be somewhat biased towards milder cases. In  
41  
42 21 addition, the use of cross-sectional data precludes us from inferring causality of the observed  
43  
44 22 associations.  
45  
46 23

47  
48 24 Our study delivers a number of new and important insights pertaining to medication misuse  
49  
50 25 and dependence in older patients. First, our study showed that concurrent use of CNSDs is still  
51  
52 26 common among older patients. This is despite recommendations specified in the national treatment  
53  
54 27 guidelines and evidence on the risk of fatal overdose.<sup>22-26</sup> Second; we comprehensively explored  
55  
56  
57  
58  
59  
60

1  
2 1 patient characteristics associated with the presence of CNSD prolonged use among hospitalized  
3  
4 2 older patients, which may be useful for raising the awareness of patient groups that may be at  
5  
6 3 increased risk.

8  
9 4 Among geriatric patients, age-related pharmacokinetic and pharmacodynamics changes, chronic  
10  
11 5 diseases, polypharmacy, and cognitive impairment can all interact and lead to greater vulnerability  
12  
13 6 to harmful effects of medication overuse. According to both the national (NORGE) and  
14  
15 7 international (Beers and STOPP) criteria<sup>27-29</sup> and treatment guidelines,<sup>22 23</sup> opioid analgesics,  
16  
17 8 benzodiazepines and z-hypnotics are all classified as inappropriate drugs for older patients and  
18  
19 9 should not be used on a long-term basis. Our findings are consistent with three studies previously  
20  
21 10 conducted in Norway<sup>6 16 30</sup> and suggest that today's prescribing behavior is suboptimal and that  
22  
23 11 more in-depth research and educational interventions are needed.<sup>31 32</sup>

26  
27 12 Problematic patterns of CNSD use may derive from different underlying factors.  
28  
29 13 Overprescribing is often unintentional, due to lenient prescribing or unawareness among prescribers  
30  
31 14 about the uncertainty of long-term efficacy of CNSDs.<sup>33 34</sup> Another factor may be the failure to  
32  
33 15 recognize at-risk patients, which may be a consequence of lacking validated instruments. Apart  
34  
35 16 from this, doctor-patient communication may also play a role. Messages on the importance of  
36  
37 17 adherence in order to avoid harmful effects of medication overuse, for instance, may not be  
38  
39 18 conveyed effectively to older patients. For the older patient counterpart, potential barriers in  
40  
41 19 understanding and adhering to medical advice may include cognitive impairment, low health  
42  
43 20 literacy and lack of family/social support.<sup>35 36</sup> Furthermore, older patients may hold opposing  
44  
45 21 attitudes regarding the discontinuation of CNSD use,<sup>21</sup> if adverse effects are under-emphasized and  
46  
47 22 hopes of attaining freedom from unnecessary pain, anxiety and sleep disturbances in old age based  
48  
49 23 only on medications are over-stated. Physicians may also experience other challenges in managing  
50  
51 24 CNSD use.<sup>37</sup> Both the magnitude and impacts of such underlying factors on the prolonged use of  
52  
53 25 CNSDs in older patients remain poorly understood, and should therefore be elaborated in future  
54  
55 26 research.

60

1  
2 1 Also of note, we found that the concurrent use of CNSDs significantly increased the odds  
3  
4 2 for misuse or dependence in older patients, even adjusted for patients' socio-demographic  
5  
6 3 background and clinically important covariates such as duration of CNSD use and intensity of pain,  
7  
8 4 anxiety and depressive symptoms (Table 3). This finding suggests that co-prescribing of CNSDs for  
9  
10 5 older patients should be done with great care. Moreover, the present study points out a significant  
11  
12 6 association between polypharmacy and CNSD prolonged use in older patients. This, to our  
13  
14 7 knowledge, has not been explored by previous research. Such associations can be explained by  
15  
16 8 several factors. Studies suggest that polypharmacy is associated with the co-occurrence of anxiety,  
17  
18 9 sleep difficulties and discomforts,<sup>38-40</sup> and might through unknown side-effects aggravate these  
19  
20 10 conditions, in turn leading to more CNSDs being prescribed for symptom relief.<sup>41</sup>  
21  
22  
23  
24

25 11 Pertaining to our finding that living alone in old age is not associated with medication  
26  
27 12 prolonged use and misuse or dependence, previous research yielded inconsistent results. Some  
28  
29 13 reported that older adults who lived alone had significantly poorer sleep quality and tended to use  
30  
31 14 more hypnotic drugs<sup>42 43</sup> whereas others claimed that living alone is not associated with or even  
32  
33 15 reduced the risk of long-term use of benzodiazepine and z-hypnotics.<sup>44-46</sup> The issue clearly deserves  
34  
35 16 further focus.  
36  
37  
38

39 17 Finally, we found that pain intensity has a highly significant relationship with both  
40  
41 18 prolonged use and misuse or dependence. This may suggest that pain intensity drives problematic  
42  
43 19 use of CNSDs. However, another possibility is that prolonged opioid use does not contribute to  
44  
45 20 improving pain. That opioid-induced hyperalgesia may worsen pain is well-known among younger  
46  
47 21 chronic opioid users.<sup>47-48</sup> However, whether pain may indeed be worsened also by prolonged CNSD  
48  
49 22 use among older patients, remains to be studied. Notably, anxiety and depression, known to be  
50  
51 23 associated with pain intensity, were not, in our study, associated with prolonged CNSD use and  
52  
53 24 misuse or dependence, even though they were reported to be common among chronic z-hypnotics  
54  
55 25 users (the major medication used in our sample).<sup>49 50</sup> The interrelationship between pain, anxiety and  
56  
57  
58  
59  
60

1  
2 1 depression is complex.<sup>51 52</sup> Future prospective studies over time are therefore needed to explain the  
3  
4 2 interplay between these entities and their influences on CNSD dependence.  
5

6 3 In conclusions, CNSD overuse (prolonged use, misuse and dependence) is still prevalent  
7  
8 4 among hospitalized older patients, despite clear guidelines and recommendations. Our findings  
9  
10 5 underline a need for stronger focus on responsible prescribing, timely detection and prevention of  
11  
12 6 medication misuse and dependence, with special attention towards older patients, those with  
13  
14 7 enhanced pain, polypharmacy and/or concurrent use of several CNSDs.  
15  
16  
17  
18  
19

## 20 9 **Acknowledgements**

21  
22 10 We express our appreciation to all participants for spending their time and effort on this study. We  
23  
24 11 are thankful to all medical staff at the three departments of Akershus University Hospital  
25  
26 12 (Geriatrics, Neurology and Endocrinology) for facilitating the data collection process. We also  
27  
28 13 gratefully acknowledge the statistical support of Professor Jurate Š. Benth.  
29  
30  
31  
32  
33

## 34 15 **Funding**

35  
36 16 This study was funded by a grant from the Norwegian Research Council (Project number 256431),  
37  
38 17 the University of Oslo and the Health Services Research Unit of the Akershus University Hospital.  
39  
40 18 The funders had no role in study design, data collection and analysis, decision to publish or  
41  
42 19 preparation of the manuscript.  
43  
44  
45  
46  
47

## 48 21 **Authors' contributions**

49  
50 22 CL conceptualized, designed and led the study. SC, ESK and CL drafted the study protocol. SC  
51  
52 23 customized the protocol, recruited participants, collected and analyzed data, and drafted this  
53  
54 24 manuscript. TGS was involved in the recruitment and data collection process. MG contributed to  
55  
56 25 the study conception and design. All authors took part in project planning and were involved in the  
57  
58 26 refinement and approval of the final version of this manuscript.  
59  
60



## 1 **Competing interests**

2 In addition to the funding given above, Dr. Lundqvist reports having received research grants from  
3 the South-East Regional Health authority, during the conduct of the study as well as grants and  
4 personal fees from Abbvie pharma AS and Roche Norway AS, outside this submitted work. These  
5 funders have no role in study design, data collection and analysis, decision to publish or preparation  
6 of the manuscript. Other authors declared no conflicts of interest.

## 8 **Patient consent for publication**

9 Not required.

## 11 **Ethics**

12 Ethical approval was obtained from the Regional Committee for Medical Research Ethics – South  
13 East Norway (Reference number: 2016/2289/REK sør-øst) and the Data Protection Office at  
14 Akershus University Hospital (Reference number: 17-054). All participants provided written  
15 informed consents. Data handling was done accordingly.

## 17 **Data sharing statement**

18 The datasets analyzed during this study are not publicly available due to threats to subject privacy  
19 but are available from the corresponding author on reasonable request.

**REFERENCES**

1. World Health Organization. Lexicon of alcohol and drug terms. Geneva: World Health Organization;1994.
2. Del Carmen Panini A, Teves MR, Giraudo E, et al. Psychotropic Medication Use in the Elderly. In: Gargiulo PÁ, Mesones-Arroyo HL, eds. Psychiatry and Neuroscience Update - Vol II: A Translational Approach. Cham: Springer International Publishing, 2017:293-306.
3. Chu LF, Angst MS, Clark D. Opioid-induced hyperalgesia in humans: molecular mechanisms and clinical considerations. *The Clinical journal of pain* 2008;**24**(6):479-96.
4. Berg C, Blix HS, Fenne O, Furu K, Hjellvik V, Husabø KJ, et al. Drug use in the elderly. Norwegian Prescription Database 2013–2017. Oslo: Norwegian Institute of Public Health; 2018.
5. Kann IC, Lundqvist C, Lurås H. Prescription of addictive and non-addictive drugs to home-dwelling elderly. *Drugs & aging* 2014;**31**(6):453-59.
6. Sundseth AC, Gjelstad S, Straand J, et al. General practitioners' prescriptions of benzodiazepines, Z-hypnotics and opioid analgesics for elderly patients during direct and indirect contacts. A cross-sectional, observational study. *Scandinavian journal of primary health care* 2018;**36**(2):115-22.
7. Cheng S, Siddiqui TG, Gossop M, Kristoffersen ES, Lundqvist C. The severity of dependence scale detects medication misuse and dependence among older hospitalized patients. Revised manuscript submitted to *BMC Geriatrics*. 2019
8. Heider D, Matschinger H, Meid AD, et al. Health service use, costs, and adverse events associated with potentially inappropriate medication in old age in Germany: retrospective matched cohort study. *Drugs & aging* 2017;**34**(4):289-301.
9. Levesque A, Nunes EV. Addiction in the Older Patient. *Recognizing Addiction in Older Patients*, 2016.
10. Karlawish J. Measuring decision-making capacity in cognitively impaired individuals. *Neurosignals*. 2008;**16**(1):91-8.
11. Folstein MF, Folstein SE, McHugh PR. "Mini-mental state". A practical method for grading the cognitive state of patients for the clinician. *Journal of psychiatric research*. 1975 Nov;**12**(3):189-98.
12. Helvik AS, Engedal K, Skancke RH, et al. A psychometric evaluation of the Hospital Anxiety and Depression Scale for the medically hospitalized elderly. *Nordic journal of psychiatry* 2011;**65**(5):338-44.
13. Djukanovic I, Carlsson J, Arestedt K. Is the Hospital Anxiety and Depression Scale (HADS) a valid measure in a general population 65-80 years old? A psychometric evaluation study. *Health Qual Life Outcomes* 2017;**15**(1):193.
14. Bell ML, Fairclough DL, Fiero MH, et al. Handling missing items in the Hospital Anxiety and Depression Scale (HADS): a simulation study. *BMC research notes* 2016;**9**(1):479-79.

- 1  
2 1 15. Ashton H. Guidelines for the rational use of benzodiazepines. When and what to use. *Drugs*  
3 2 1994;**48**(1):25-40.  
4 3  
5 4 16. Sakshaug S, Handal M, Hjellvik V, et al. Long-term Use of Z-Hypnotics and Co-medication  
6 5 with Benzodiazepines and Opioids. *Basic & clinical pharmacology & toxicology* 2017;**120**(3):292-  
7 6 98.  
8 7  
9 8 17. Mordal J, Gundersen Ø, Bramness JG. Norwegian version of the Mini-International  
10 9 Neuropsychiatric Interview: Feasibility, acceptability and test-retest reliability in an acute  
11 10 psychiatric ward. *European Psychiatry* 2010;**25**(3):172-77.  
12 11  
13 12 18. American Psychiatric Association. Diagnostic and statistical manual of mental disorders, fourth  
14 13 edition. Washington, DC: American Psychiatric Association; 1994.  
15 14  
16 15 19. Gnjidic D, Hilmer SN, Blyth FM, et al. Polypharmacy cutoff and outcomes: five or more  
17 16 medicines were used to identify community-dwelling older men at risk of different adverse  
18 17 outcomes. *Journal of clinical epidemiology* 2012;**65**(9):989-95.  
19 18  
20 19 20. StataCorp. Stata Statistical Software: Release 15. College Station, TX: StataCorp LLC, 2017.  
21 20  
22 21 21. Mokhar A, Kuhn S, Topp J, et al. Long-term use of benzodiazepines and Z drugs: a qualitative  
23 22 study of patients' and healthcare professionals' perceptions and possible levers for change. *BJGP*  
24 23 open 2019;**3**(1):bjgpopen18X101626.  
25 24  
26 25 22. Helsedirektoratet. Nasjonal faglig veileder vanedannende legemidler - rekvirering og  
27 26 forsvarlighet. [National guidelines - addictive drugs]. The Norwegian Directorate of Health; 2015.  
28 27  
29 28 23. Helsedirektoratet. Nasjonal faglig veileder for bruk av opioider - ved langvarige ikke-  
30 29 krefrelatererte smerter. [National guidelines for the use of opioids]. The Norwegian Directorate of  
31 30 Health; 2016.  
32 31  
33 32 24. Hernandez I, He M, Brooks MM, et al. Exposure-Response Association Between Concurrent  
34 33 Opioid and Benzodiazepine Use and Risk of Opioid-Related Overdose in Medicare Part D  
35 34 Beneficiaries. *JAMA Network Open* 2018;**1**(2):e180919-e19.  
36 35  
37 36 25. Sun EC, Dixit A, Humphreys K, et al. Association between concurrent use of prescription  
38 37 opioids and benzodiazepines and overdose: retrospective analysis. *bmj* 2017;**356**:j760.  
39 38  
40 39 26. Garg RK, Fulton-Kehoe D, Franklin GM. Patterns of opioid use and risk of opioid overdose  
41 40 death among Medicaid patients. *Medical care* 2017;**55**(7):661-68.  
42 41  
43 42 27. Nyborg G, Straand J, Klovning A, et al. The Norwegian General Practice–Nursing Home  
44 43 criteria (NORGE-P-NH) for potentially inappropriate medication use: A web-based Delphi study.  
45 44 *Scandinavian journal of primary health care* 2015;**33**(2):134-41.  
46 45  
47 46 28. Panel AGSBCUE, Fick DM, Semla TP, et al. American Geriatrics Society 2015 updated beers  
48 47 criteria for potentially inappropriate medication use in older adults. *Journal of the American*  
49 48 *Geriatrics Society* 2015;**63**(11):2227-46.  
50 49  
51 50 29. Hamilton H, Gallagher P, Ryan C, et al. Potentially Inappropriate Medications Defined by  
52 51 STOPP Criteria and the Risk of Adverse Drug Events in Older Hospitalized Patients PIMs Defined  
53 52 by STOPP Criteria and Risk of ADEs. *JAMA Internal Medicine* 2011;**171**(11):1013-19.

- 1  
2 1 30. Neutel CI, Skurtveit S, Berg C. Benzodiazepine and z-hypnotic use in Norwegian elderly, aged  
3 2 65-79. *Norsk epidemiologi* 2012;**22**(2).  
4 3  
5 4 31. Voepel-Lewis T, Tait AR, Becher A, et al. An interactive web-based educational program  
6 5 improves prescription opioid risk knowledge and perceptions among parents. *Pain Management*  
7 6 2019(0).  
8 7  
9 8 32. Kline TV, Savage RL, Greenslade JH, et al. Affecting emergency department oxycodone  
10 9 discharge prescribing: An educational intervention. *Emergency Medicine Australasia*  
11 10 2019;**31**(4):580-86.  
12 11  
13 12 33. Kolodny A, Courtwright DT, Hwang CS, et al. The prescription opioid and heroin crisis: a  
14 13 public health approach to an epidemic of addiction. *Annual review of public health* 2015;**36**:559-74.  
15 14  
16 15 34. Weiß V, Nau R, Glaeske G, et al. The interplay of context factors in hypnotic and sedative  
17 16 prescription in primary and secondary care—a qualitative study. *European Journal of Clinical*  
18 17 *Pharmacology* 2019;**75**(1):87-97.  
19 18  
20 19 35. Kvarnström K, Airaksinen M, Liira H. Barriers and facilitators to medication adherence: a  
21 20 qualitative study with general practitioners. *BMJ open* 2018;**8**(1):e015332.  
22 21  
23 22 36. Kee JWY, Khoo HS, Lim I, et al. Communication Skills in Patient-Doctor Interactions:  
24 23 Learning from Patient Complaints. *Health Professions Education* 2018;**4**(2):97-106.  
25 24  
26 25 37. Sirdifield C, Anthierens S, Creupelandt H, et al. General practitioners' experiences and  
27 26 perceptions of benzodiazepine prescribing: systematic review and meta-synthesis. *BMC family*  
28 27 *practice* 2013;**14**(1):191.  
29 28  
30 29 38. Wongpakaran N, Wongpakaran T, Sirirak T, et al. Predictors of polypharmacy among elderly  
31 30 Thais with depressive and anxiety disorders: findings from the DAS study. *BMC geriatrics*  
32 31 2018;**18**(1):309.  
33 32  
34 33 39. Ancoli-Israel S, Shochat T. Chapter 135 - Insomnia in Older Adults A2 - Kryger, Meir H. In:  
35 34 Roth T, Dement WC, eds. *Principles and Practice of Sleep Medicine (Fifth Edition)*. Philadelphia:  
36 35 W.B. Saunders, 2011:1544-50.  
37 36  
38 37 40. Rambhade S, Chakarborty A, Shrivastava A, et al. A survey on polypharmacy and use of  
39 38 inappropriate medications. *Toxicology international* 2012;**19**(1):68.  
40 39  
41 40 41. Lam YWF. Polypharmacy in elderly opioid users. *The Brown University Psychopharmacology*  
42 41 *Update* 2019;**30**(5):2-3.  
43 42  
44 43 42. Hägg M, Houston B, Elmståhl S, et al. Sleep quality, use of hypnotics and sleeping habits in  
45 44 different age-groups among older people. *Scandinavian journal of caring sciences* 2014;**28**(4):842-  
46 45 51.  
47 46  
48 47 43. Yu B, Steptoe A, Niu K, et al. Prospective associations of social isolation and loneliness with  
49 48 poor sleep quality in older adults. *Quality of Life Research* 2018;**27**(3):683-91.  
50 49  
51 50 44. Mokhar A, Tillenburg N, Dirmaier J, et al. Potentially inappropriate use of benzodiazepines and  
52 51 z-drugs in the older population-analysis of associations between long-term use and patient-related  
53 52 factors. *PeerJ* 2018;**6**:e4614-e14.

- 1  
2 1 45. Luijendijk HJ, Tiemeier H, Hofman A, et al. Determinants of chronic benzodiazepine use in the  
3 2 elderly: A longitudinal study. *British Journal of Clinical Pharmacology* 2008;**65**(4):593-99.  
4 3  
5 4 46. Proulx-Tremblay V, Allary A, Payette M-C, et al. Social support and sleep quality in older  
6 5 benzodiazepine users. *Aging & mental health* 2019:1-7.  
7 6  
8 7 47. Lee M, Silverman SM, Hansen H, et al. A comprehensive review of opioid-induced  
9 8 hyperalgesia. *Pain Physician* 2011;**14**(2):145-61.  
10 9  
11 10 48. Mitra S. Opioid-induced hyperalgesia: pathophysiology and clinical implications. *Journal of*  
12 11 *opioid management* 2018;**4**(3):123-30.  
13 12  
14 13 49. Kripke DF. Greater incidence of depression with hypnotic use than with placebo. *BMC*  
15 14 *Psychiatry* 2007;**7**(1):42.  
16 15  
17 16 50. Abolhassani N, Haba-Rubio J, Heinzer R, et al. Ten-year trend in sleeping pills use in  
18 17 Switzerland: The CoLaus study. *Sleep Medicine* 2019.  
19 18  
20 19 51. Means-Christensen AJ, Roy-Byrne PP, Sherbourne CD, et al. Relationships among pain,  
21 20 anxiety, and depression in primary care. *Depression and Anxiety* 2008;**25**(7):593-600.  
22 21  
23 22 52. Sheng J, Liu S, Wang Y, et al. The Link between Depression and Chronic Pain: Neural  
24 23 *Mechanisms in the Brain*. *Neural Plast* 2017;**2017**:9724371-71.  
25  
26  
27  
28  
29  
30  
31  
32  
33  
34  
35  
36  
37  
38  
39  
40  
41  
42  
43  
44  
45  
46  
47  
48  
49  
50  
51  
52  
53  
54  
55  
56  
57  
58  
59  
60

1  
2  
3  
4  
5  
6  
7  
8  
9  
10  
11  
12  
13  
14  
15  
16  
17  
18  
19  
20  
21  
22  
23  
24  
25  
26  
27  
28  
29  
30  
31  
32  
33  
34  
35  
36  
37  
38  
39  
40  
41  
42  
43  
44  
45  
46  
47  
48  
49  
50  
51  
52  
53  
54  
55  
56  
57  
58  
59  
60

## **Figure legends**

**Figure 1.** Flow of participants through the study

**Table 1.** Patient characteristics

**Table 2.** Logistic regression models for factors associated with prolonged use of CNSDs – estimated using multiple imputations

**Table 3.** Logistic regression models for factors associated with CNSD misuse or dependence – estimated using multiple imputations

**Additional file 1.** Questionnaire and interview guide

**Additional file 2.** Sensitivity analyses

**Figure 1.** Flow of participants through the study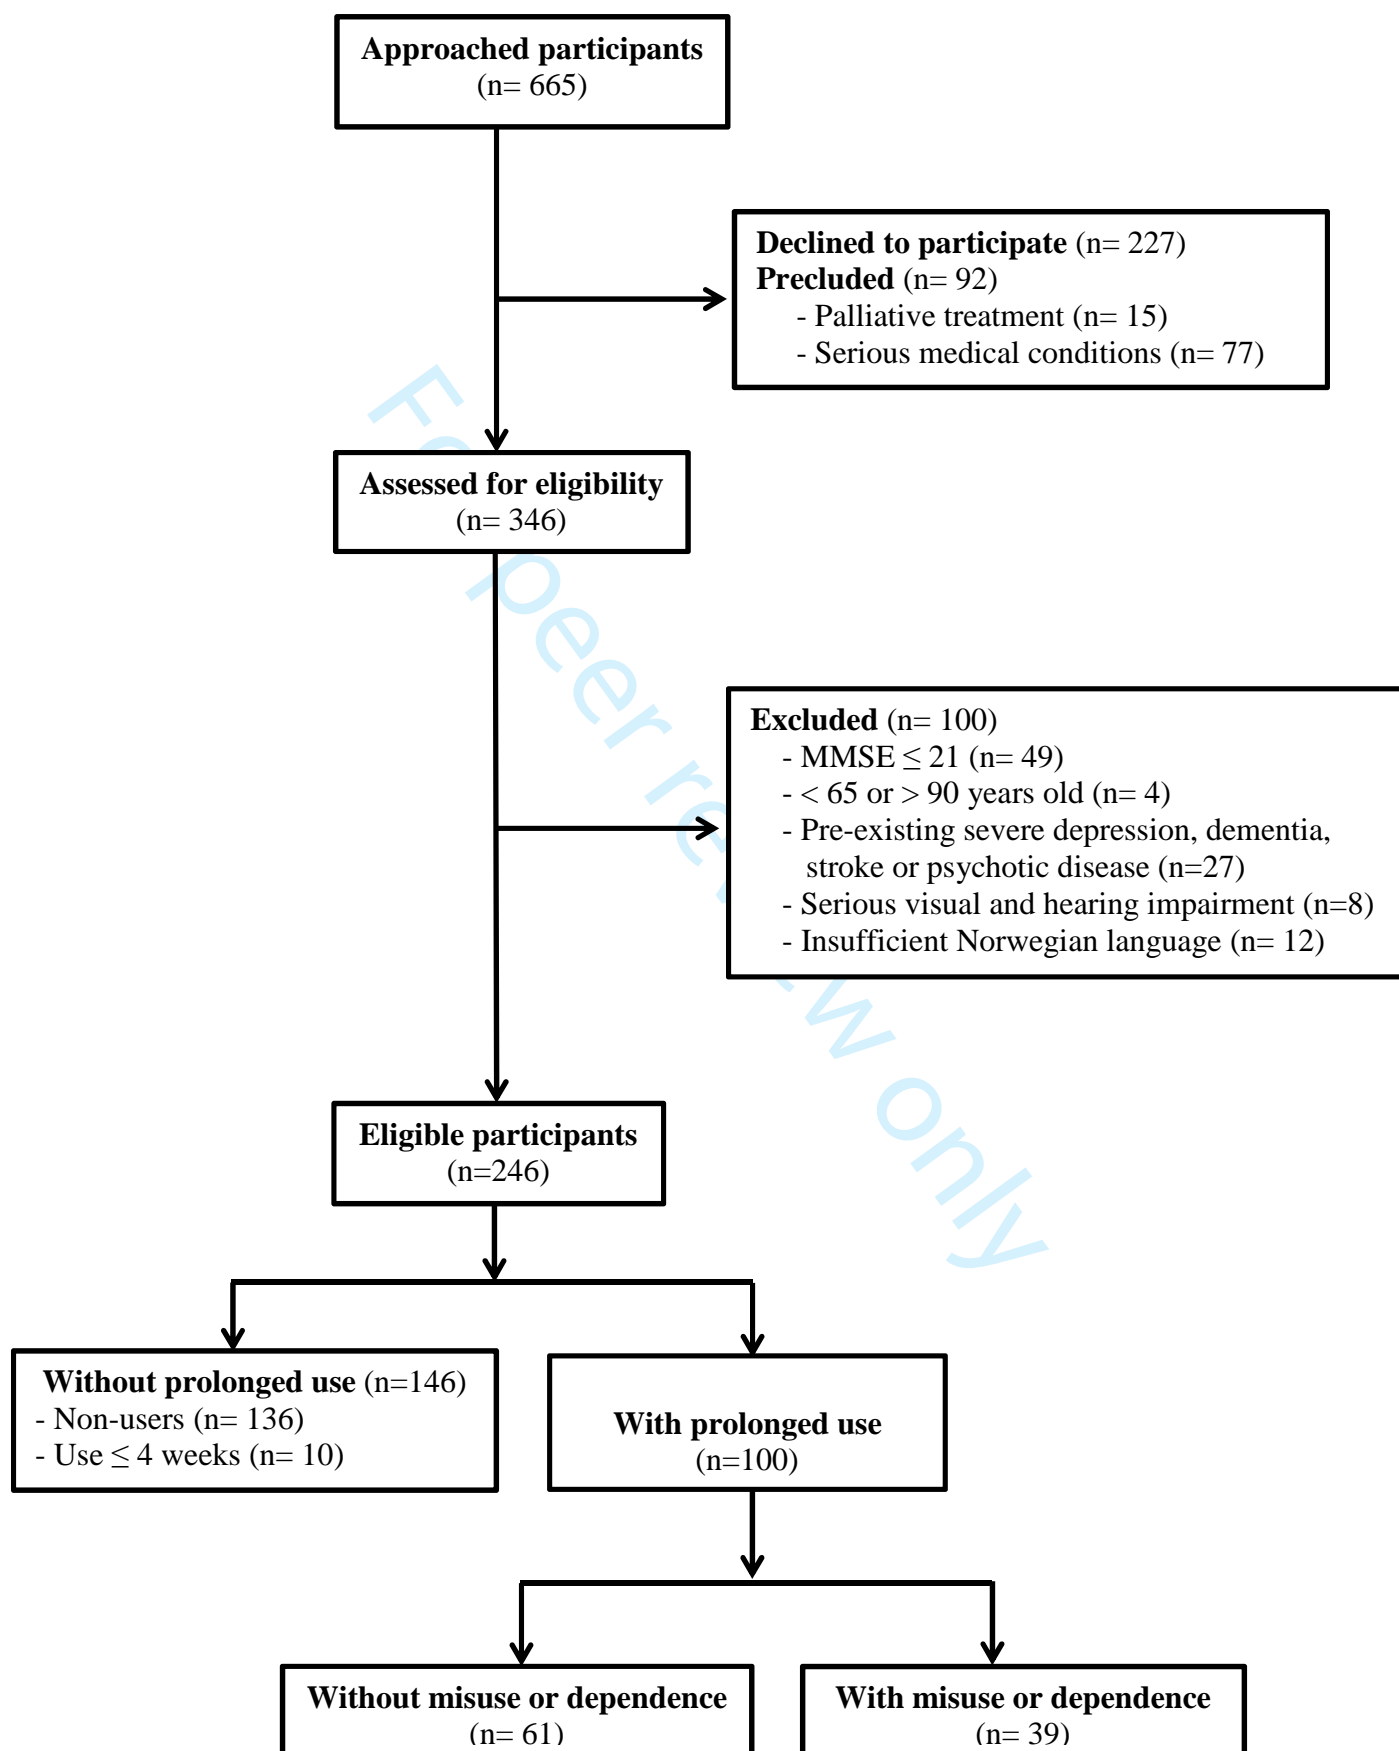

**SOCIODEMOGRAPHIC BACKGROUND****1. Sex** Male Female**2. The year you were born: .....****3. Your highest education level:** Basic education Secondary education College or university (number of years:.....)**4. Your annual income (NOK per year)** < 200 000 200 000–349 000 ≥ 350 0000**5. Do you live alone?** No Yes



## THE HOSPITAL ANXIETY AND DEPRESSION SCALE

|                                                                                                                                                                                                                                                                                                                                                                   |                                                                                                                                                                                                                                                                                                                                              |
|-------------------------------------------------------------------------------------------------------------------------------------------------------------------------------------------------------------------------------------------------------------------------------------------------------------------------------------------------------------------|----------------------------------------------------------------------------------------------------------------------------------------------------------------------------------------------------------------------------------------------------------------------------------------------------------------------------------------------|
| <p><b>1. I feel tense or 'wound up':</b></p> <p>3 <input type="checkbox"/> Most of the time<br/>           2 <input type="checkbox"/> A lot of the time<br/>           1 <input type="checkbox"/> From time to time, occasionally<br/>           0 <input type="checkbox"/> Not at all</p>                                                                        | <p><b>2. I still enjoy the things I used to enjoy</b></p> <p>0 <input type="checkbox"/> Definitely as much<br/>           1 <input type="checkbox"/> Not quite so much<br/>           2 <input type="checkbox"/> Only a little<br/>           3 <input type="checkbox"/> Hardly at all</p>                                                   |
| <p><b>3. I get a sort of frightened feeling as if something awful is about to happen:</b></p> <p>3 <input type="checkbox"/> Very definitely and quite badly<br/>           2 <input type="checkbox"/> Yes, but not too badly<br/>           1 <input type="checkbox"/> A little, but it doesn't worry me<br/>           0 <input type="checkbox"/> Not at all</p> | <p><b>4. I can laugh and see the funny side of things:</b></p> <p>0 <input type="checkbox"/> As much as I always could<br/>           1 <input type="checkbox"/> Not quite so much now<br/>           2 <input type="checkbox"/> Definitely not so much now<br/>           3 <input type="checkbox"/> Not at all</p>                         |
| <p><b>5. Worrying thoughts go through my mind:</b></p> <p>3 <input type="checkbox"/> A great deal of the time<br/>           2 <input type="checkbox"/> A lot of the time<br/>           1 <input type="checkbox"/> From time to time but not too often<br/>           0 <input type="checkbox"/> Only occasionally</p>                                           | <p><b>6. I feel cheerful:</b></p> <p>3 <input type="checkbox"/> Not at all<br/>           2 <input type="checkbox"/> Not often<br/>           1 <input type="checkbox"/> Sometimes<br/>           0 <input type="checkbox"/> Most of the time</p>                                                                                            |
| <p><b>7. I can sit at ease and feel relaxed:</b></p> <p>0 <input type="checkbox"/> Definitely<br/>           1 <input type="checkbox"/> Usually<br/>           2 <input type="checkbox"/> Not often<br/>           3 <input type="checkbox"/> Not at all</p>                                                                                                      | <p><b>8. I feel as if I have slowed down:</b></p> <p>3 <input type="checkbox"/> Nearly all the time<br/>           2 <input type="checkbox"/> Very often<br/>           1 <input type="checkbox"/> Sometimes<br/>           0 <input type="checkbox"/> Not at all</p>                                                                        |
| <p><b>9. I get a sort of frightened feeling like 'butterflies' in the stomach:</b></p> <p>0 <input type="checkbox"/> Not at all<br/>           1 <input type="checkbox"/> Occasionally<br/>           2 <input type="checkbox"/> Quite often<br/>           3 <input type="checkbox"/> Very often</p>                                                             | <p><b>10. I have lost interest in my appearance:</b></p> <p>3 <input type="checkbox"/> Definitely<br/>           2 <input type="checkbox"/> I don't take so much care as I should<br/>           1 <input type="checkbox"/> I may not take quite as much care<br/>           0 <input type="checkbox"/> I take just as much care as ever</p> |
| <p><b>11. I feel restless as if I have to be on the move:</b></p> <p>3 <input type="checkbox"/> Very much indeed<br/>           2 <input type="checkbox"/> Quite a lot<br/>           1 <input type="checkbox"/> Not very much<br/>           0 <input type="checkbox"/> Not at all</p>                                                                           | <p><b>12. I look forward with enjoyment to things:</b></p> <p>0 <input type="checkbox"/> As much as ever I did<br/>           1 <input type="checkbox"/> Rather less than I used to<br/>           2 <input type="checkbox"/> Definitely less than I used to<br/>           3 <input type="checkbox"/> Hardly at all</p>                     |
| <p><b>13. I get sudden feelings of panic:</b></p> <p>3 <input type="checkbox"/> Very often indeed<br/>           2 <input type="checkbox"/> Quite often<br/>           1 <input type="checkbox"/> Not very often<br/>           0 <input type="checkbox"/> Not at all</p>                                                                                         | <p><b>14. I can enjoy a good book or radio or TV programme:</b></p> <p>0 <input type="checkbox"/> Often<br/>           1 <input type="checkbox"/> Sometimes<br/>           2 <input type="checkbox"/> Not often<br/>           3 <input type="checkbox"/> Very seldom</p>                                                                    |

**Total anxiety score:**

**Total depression score:**

1  
2  
3  
4  
5  
6  
7  
8  
9  
10  
11  
12  
13  
14  
15  
16  
17  
18  
19  
20  
21  
22  
23  
24  
25  
26  
27  
28  
29  
30  
31  
32  
33  
34  
35  
36  
37  
38  
39  
40  
41  
42  
43  
44  
45  
46  
47  
48  
49  
50  
51  
52  
53  
54  
55  
56  
57  
58  
59  
60

**PAIN INTENSITY  
(Visual analogue scale)**

Please mark on the line to describe how much pain you are currently feeling:

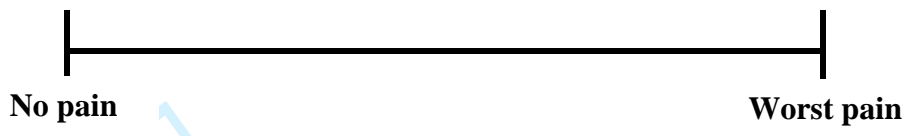

For peer review only

**MINI INTERNATIONAL NEUROPSYCHIATRIC INTERVIEW**

**DSM-IV criteria, Version 6.0.0**

**PSYCHOACTIVE SUBSTANCE USE DISORDERS (NON-ALCOHOL)**

➡ MEANS: GO TO THE DIAGNOSTIC BOXES, CIRCLE NO IN ALL DIAGNOSTIC BOXES, AND MOVE TO THE NEXT MODULE)

Now I am going to show you/read to you a list of street drugs or medicines.

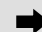

**J1** Have you in the past 12 months ever taken any of these drugs more than once to get high, to feel better, or to change your mood? NO YES

**CIRCLE EACH DRUG TAKEN:**

**Stimulants:** amphetamines, "speed", methamphetamine (crystal meth), "crank", "rush", Dexedrine, Ritalin, diet pills.

**Cocaine:** cocaine, snorting, IV, freebase, crack, "speedball".

**Opiates:** heroin, morphine, opium, methadone, codeine, OxyContin.

**Hallucinogens:** LSD ("acid"), mescaline, peyote, psilocybin, STP, "mushrooms", "ecstasy", MDA, MDMA.

**Phencyclidin:** PCP ("Angel Dust", "PeaCe Pill", "Tranq") or ketamin ("special K").

**Inhalants:** glue, ethyl chloride, "rush", dinitrogen monoxide ("laughing gas"), amyl or butyl nitrate ("poppers").

**Cannabis:** marijuana, hashish ("hash"), THC, "reefer", "grass".

**Anxiolytics:** Valium, Vival, Stesolid, Xanor (alprazolam), Seconal, Librium, Ativan, Halcion, barbiturates, GHB, Rohypnol ("Roofies").

**Miscellaneous:** steroids, nonprescription sleep or diet pills, cough syrup. Any others?

SPECIFY MOST USED DRUG(S): \_\_\_\_\_

WHICH SUBSTANCE(S)/MEDICATION(S) CAUSE THE MAJOR PROBLEMS? \_\_\_\_\_

**J2** Considering your use of (name the drug / drug class selected), in the past 12 months:

a. Have you found that you needed to use more (name of drug / drug class selected) to get the same effect that you did when you first started taking it? NO YES

b. When you reduced or stopped using (name of drug / drug class selected), did you have withdrawal symptoms (aches, shaking, fever, weakness, diarrhea, nausea, sweating, heart pounding, difficulty sleeping, or feeling agitated, anxious, irritable, or depressed)? NO YES  
 Did you use any drug(s) to keep yourself from getting sick (withdrawal symptoms) or so that you would feel better?

IF YES TO EITHER QUESTION, CODE YES.

c. Have you often found that when you used (name of drug / drug class selected), NO YES

1  
2  
3 you ended up taking more than you thought you would?  
4

- 5  
6 d. Have you tried to reduce or stop taking (name of drug / drug class selected), but failed? NO YES  
7  
8 e. On the days that you used (name of drug / drug class selected), did you spend substantial NO YES  
9 time (> 2 hours) in obtaining, using or in recovering from drug(s), or thinking about drug(s)?  
10  
11  
12 f. Did you spend less time working, enjoying hobbies, or being with family or friends NO YES  
13 because of your drug use?  
14  
15  
16 g. Have you continued to use (name of drug / drug class selected) even though it caused NO YES  
17 you health or mental problems?  
18  
19  
20

21  
22 ARE **3** OR MORE **J2** ANSWERS CODED YES?

23  
24 SPECIFY DRUG(S): \_\_\_\_\_  
25  
26  
27

|                             |     |
|-----------------------------|-----|
| NO                          | YES |
| <i>SUBSTANCE DEPENDENCE</i> |     |

28  
29 **J3 Considering your use of (name the drug / drug class selected), in the past 12 months:**

- 30 a. Have you been intoxicated, high, or hungover from (name of drug / drug class selected) NO YES  
31 more than once, when you had other responsibilities at school, at work, or at home?  
32 Did this cause any problems?  
33 (CODE YES ONLY IF THIS CAUSED PROBLEMS.)  
34  
35 b. Have you been high or intoxicated from (name of drug / drug class selected) NO YES  
36 more than once, in any situation where you were physically at risk, (for example,  
37 driving a car, riding a motorbike, using machinery, boating, etc.)?  
38  
39 c. Did you have legal problems more than once, because of your drug use, NO YES  
40 for example, an arrest or disorderly conduct?  
41  
42 d. Did you continue to use (name of drug / drug class selected) even though it caused NO YES  
43 problems with your family or other people?  
44  
45  
46

47  
48 ARE **1** OR MORE **J3** ANSWERS CODED YES?

49  
50 SPECIFY DRUG(S): \_\_\_\_\_  
51  
52  
53  
54  
55  
56  
57  
58  
59  
60

|                        |     |
|------------------------|-----|
| NO                     | YES |
| <i>SUBSTANCE ABUSE</i> |     |
| <b>CURRENT</b>         |     |

**ADDITIONAL QUESTIONS TO CONFIRM MEDICATION USE PATTERNS**

1. How long have you been using this medication?
2. How many days per week do you need to take the medication (on average)?
3. Do you need to take it every day?  
If yes, ask: for how long the patient has used the medication every day?
4. Have there been periods that you have not used the medication at all?

For peer review only

Sensitivity analysis for factor associated with prolonged use of CNSDs – Logistic regression models, estimated using complete case analysis

| Independent variable                             | Bivariate         |                  | Multivariate        |                  |
|--------------------------------------------------|-------------------|------------------|---------------------|------------------|
|                                                  | OR (95%CI)        | P-value          | Adjusted OR (95%CI) | P-value          |
| <b>Sex</b>                                       |                   |                  |                     |                  |
| Male                                             | 1                 |                  | 1                   |                  |
| Female                                           | 2.05 (1.21-3.47)  | <b>0.007</b>     | 1.64 (0.77-3.50)    | 0.20             |
| <b>Age groups, years</b>                         |                   |                  |                     |                  |
| 65-74                                            | 1                 |                  | 1                   |                  |
| 75-84                                            | 2.25 (1.27-4.00)  | <b>0.006</b>     | 2.31 (1.07-5.01)    | <b>0.03</b>      |
| ≥ 85                                             | 3.91 (1.75-8.74)  | <b>0.001</b>     | 3.52 (1.11-11.20)   | <b>0.03</b>      |
| <b>Education, years</b>                          |                   |                  |                     |                  |
| Basic education (≤ 10)                           | 1                 |                  | 1                   |                  |
| Secondary education (11-13)                      | 0.26 (0.12-0.54)  | <b>&lt;0.001</b> | 0.35 (0.13-0.97)    | <b>0.04</b>      |
| Higher education (≥ 14)                          | 0.30 (0.14-0.64)  | <b>0.002</b>     | 0.41 (0.15-1.14)    | 0.09             |
| <b>Income (NOK/year)</b>                         |                   |                  |                     |                  |
| < 200 000                                        | 1                 |                  | 1                   |                  |
| 200 000 – 349 000                                | 0.63 (0.24-1.68)  | 0.36             | 0.48 (0.14-1.67)    | 0.25             |
| ≥ 350 000                                        | 0.25 (0.09-0.66)  | <b>0.005</b>     | 0.18 (0.05-0.69)    | <b>0.01</b>      |
| <b>Living alone</b>                              |                   |                  |                     |                  |
| No                                               | 1                 |                  | 1                   |                  |
| Yes                                              | 1.80 (1.08-3.01)  | <b>0.03</b>      | 0.56 (0.25-1.27)    | 0.17             |
| <b>Polypharmacy (≥ 5 drugs/day)</b>              |                   |                  |                     |                  |
| No                                               | 1                 |                  | 1                   |                  |
| Yes                                              | 6.95 (3.13-15.41) | <b>&lt;0.001</b> | 4.64 (1.73-12.48)   | <b>0.002</b>     |
| <b>Anxiety scores (HADS-A)</b>                   | 1.07 (0.99-1.15)  | 0.08             | 1.04 (0.92-1.17)    | 0.54             |
| <b>Depression scores (HADS-D)</b>                | 1.15 (1.06-1.26)  | <b>0.001</b>     | 1.08 (0.95-1.23)    | 0.23             |
| <b>Pain intensity (millimeters on VAS scale)</b> | 1.02 (1.01-1.03)  | <b>&lt;0.001</b> | 1.03 (1.01-1.04)    | <b>&lt;0.001</b> |

Abbreviations:

CNSD – central nervous system depressant drugs

HADS–D/A – hospital anxiety and depression scale, depression or anxiety subscore.

Sensitivity analysis for factors associated with CNSD misuse or dependence – Logistic regression models, estimated using complete case analysis

| Independent variable                           | Bivariate         |              | Multivariate        |              |
|------------------------------------------------|-------------------|--------------|---------------------|--------------|
|                                                | OR (95%CI)        | P-value      | Adjusted OR (95%CI) | P-value      |
| <b>Sex</b>                                     |                   |              |                     |              |
| Male                                           | 1                 |              | 1                   |              |
| Female                                         | 1.54 (0.65-3.67)  | 0.33         | 1.50 (0.43-5.25)    | 0.52         |
| <b>Age, years</b>                              |                   |              |                     |              |
| 65-74                                          | 1                 |              | 1                   |              |
| 75-84                                          | 0.90 (0.34-2.37)  | 0.83         | 1.46 (0.36-5.96)    | 0.60         |
| ≥ 85                                           | 2.40 (0.75-7.65)  | 0.14         | 3.33 (0.55-20.16)   | 0.19         |
| <b>Education, years</b>                        |                   |              |                     |              |
| Basic education (≤10)                          | 1                 |              | 1                   |              |
| Secondary education (11-13)                    | 0.62 (0.22-1.77)  | 0.37         | 0.96 (0.20-4.60)    | 0.96         |
| Higher education (≥14)                         | 0.85 (0.31-2.32)  | 0.75         | 0.94 (0.22-3.99)    | 0.93         |
| <b>Income (NOK/year)</b>                       |                   |              |                     |              |
| < 200 000                                      | 1                 |              | 1                   |              |
| 200 000 – 349 000                              | 0.92 (0.27-3.21)  | 0.90         | 1.67 (0.28-9.95)    | 0.57         |
| ≥ 350 000                                      | 0.44 (0.11-1.73)  | 0.24         | 0.83 (0.10-6.94)    | 0.86         |
| <b>Living alone</b>                            |                   |              |                     |              |
| No                                             | 1                 |              | 1                   |              |
| Yes                                            | 2.65 (1.14-6.18)  | <b>0.02</b>  | 2.24 (0.53-9.44)    | 0.27         |
| <b>Polypharmacy (≥ 5 drugs/day)</b>            |                   |              |                     |              |
| No                                             | 1                 |              | 1                   |              |
| Yes                                            | 2.02 (0.39-10.55) | 0.41         | 1.74 (0.14-21.22)   | 0.66         |
| <b>Concurrent use</b>                          |                   |              |                     |              |
| No (exclusive use)                             | 1                 |              | 1                   |              |
| Yes                                            | 3.5 (1.44-8.54)   | <b>0.006</b> | 8.77 (2.19-35.10)   | <b>0.002</b> |
| <b>Duration of CNSD use (weeks)</b>            | 1.00 (0.99-1.00)  | 0.94         | 1.00 (0.99-1.01)    | 0.11         |
| <b>Anxiety scores (HADS-A)</b>                 | 1.08(0.97-1.21)   | 0.15         | 1.01 (0.82-1.25)    | 0.94         |
| <b>Depression scores (HADS-D)</b>              | 1.05 (0.93-1.19)  | 0.42         | 1.01 (0.81-1.27)    | 0.92         |
| <b>Pain intensity (millimeters, VAS scale)</b> | 1.01 (0.99-1.03)  | 0.08         | 1.03 (1.01-1.06)    | <b>0.009</b> |

Abbreviations:

CNSD – central nervous system depressant drugs

HADS–D/A – hospital anxiety and depression scale, depression or anxiety subscore.

1  
2  
3  
4  
5  
6  
7  
8  
9  
10  
11  
12  
13  
14  
15  
16  
17  
18  
19  
20  
21  
22  
23  
24  
25  
26  
27  
28  
29  
30  
31  
32  
33  
34  
35  
36  
37  
38  
39  
40  
41  
42  
43  
44  
45  
46  
47  
48  
49  
50  
51  
52  
53  
54  
55  
56  
57  
58  
59  
60STROBE Statement—Checklist of items that should be included in reports of *cross-sectional studies*

|                              | Item No | Recommendation                                                                                                                                                                                    | Reported on page # |
|------------------------------|---------|---------------------------------------------------------------------------------------------------------------------------------------------------------------------------------------------------|--------------------|
| <b>Title and abstract</b>    | 1       | (a) Indicate the study's design with a commonly used term in the title or the abstract                                                                                                            | 1                  |
|                              |         | (b) Provide in the abstract an informative and balanced summary of what was done and what was found                                                                                               | 2-3                |
| <b>Introduction</b>          |         |                                                                                                                                                                                                   |                    |
| Background/rationale         | 2       | Explain the scientific background and rationale for the investigation being reported                                                                                                              | 4-5                |
| Objectives                   | 3       | State specific objectives, including any prespecified hypotheses                                                                                                                                  | 5                  |
| <b>Methods</b>               |         |                                                                                                                                                                                                   |                    |
| Study design                 | 4       | Present key elements of study design early in the paper                                                                                                                                           | 5                  |
| Setting                      | 5       | Describe the setting, locations, and relevant dates, including periods of recruitment, exposure, follow-up, and data collection                                                                   | 5-6                |
| Participants                 | 6       | (a) Give the eligibility criteria, and the sources and methods of selection of participants                                                                                                       | 5-6                |
| Variables                    | 7       | Clearly define all outcomes, exposures, predictors, potential confounders, and effect modifiers. Give diagnostic criteria, if applicable                                                          | 6-7                |
| Data sources/<br>measurement | 8*      | For each variable of interest, give sources of data and details of methods of assessment (measurement). Describe comparability of assessment methods if there is more than one group              | 6-7                |
| Bias                         | 9       | Describe any efforts to address potential sources of bias                                                                                                                                         | 5-8                |
| Study size                   | 10      | Explain how the study size was arrived at                                                                                                                                                         | 8                  |
| Quantitative variables       | 11      | Explain how quantitative variables were handled in the analyses. If applicable, describe which groupings were chosen and why                                                                      | 6-8                |
| Statistical methods          | 12      | (a) Describe all statistical methods, including those used to control for confounding                                                                                                             | 7-8                |
|                              |         | (b) Describe any methods used to examine subgroups and interactions                                                                                                                               | 7-8                |
|                              |         | (c) Explain how missing data were addressed                                                                                                                                                       | 8                  |
|                              |         | (d) If applicable, describe analytical methods taking account of sampling strategy                                                                                                                | N/A                |
|                              |         | (e) Describe any sensitivity analyses                                                                                                                                                             | 8                  |
| <b>Results</b>               |         |                                                                                                                                                                                                   |                    |
| Participants                 | 13*     | (a) Report numbers of individuals at each stage of study—eg numbers potentially eligible, examined for eligibility, confirmed eligible, included in the study, completing follow-up, and analysed | 8                  |
|                              |         | (b) Give reasons for non-participation at each stage                                                                                                                                              | 8                  |
|                              |         | (c) Consider use of a flow diagram                                                                                                                                                                | 8                  |
| Descriptive data             | 14*     | (a) Give characteristics of study participants (eg demographic, clinical, social)                                                                                                                 | 9-10               |



|                          |     |                                                                                                                                                                                                              |       |
|--------------------------|-----|--------------------------------------------------------------------------------------------------------------------------------------------------------------------------------------------------------------|-------|
|                          |     | and information on exposures and potential confounders                                                                                                                                                       |       |
|                          |     | (b) Indicate number of participants with missing data for each variable of interest                                                                                                                          | 8     |
| Outcome data             | 15* | Report numbers of outcome events or summary measures                                                                                                                                                         | 8-11  |
| Main results             | 16  | (a) Give unadjusted estimates and, if applicable, confounder-adjusted estimates and their precision (eg, 95% confidence interval). Make clear which confounders were adjusted for and why they were included | 11-13 |
|                          |     | (b) Report category boundaries when continuous variables were categorized                                                                                                                                    | 10    |
|                          |     | (c) If relevant, consider translating estimates of relative risk into absolute risk for a meaningful time period                                                                                             | N/A   |
| Other analyses           | 17  | Report other analyses done—eg analyses of subgroups and interactions, and sensitivity analyses                                                                                                               | 9-13  |
| <b>Discussion</b>        |     |                                                                                                                                                                                                              |       |
| Key results              | 18  | Summarise key results with reference to study objectives                                                                                                                                                     | 13-14 |
| Limitations              | 19  | Discuss limitations of the study, taking into account sources of potential bias or imprecision. Discuss both direction and magnitude of any potential bias                                                   | 14    |
| Interpretation           | 20  | Give a cautious overall interpretation of results considering objectives, limitations, multiplicity of analyses, results from similar studies, and other relevant evidence                                   | 14-17 |
| Generalisability         | 21  | Discuss the generalisability (external validity) of the study results                                                                                                                                        | 14    |
| <b>Other information</b> |     |                                                                                                                                                                                                              |       |
| Funding                  | 22  | Give the source of funding and the role of the funders for the present study and, if applicable, for the original study on which the present article is based                                                | 17    |

\*Give information separately for exposed and unexposed groups.

**Note:** An Explanation and Elaboration article discusses each checklist item and gives methodological background and published examples of transparent reporting. The STROBE checklist is best used in conjunction with this article (freely available on the Web sites of PLoS Medicine at <http://www.plosmedicine.org/>, Annals of Internal Medicine at <http://www.annals.org/>, and Epidemiology at <http://www.epidem.com/>). Information on the STROBE Initiative is available at [www.strobe-statement.org](http://www.strobe-statement.org).

# BMJ Open

## Sociodemographic, clinical and pharmacological profiles of medication misuse and dependence in hospitalized older patients in Norway: a prospective cross-sectional study

|                                 |                                                                                                                                                                                                                                                                                                                                                                                                                                                                                                                                                                                                                          |
|---------------------------------|--------------------------------------------------------------------------------------------------------------------------------------------------------------------------------------------------------------------------------------------------------------------------------------------------------------------------------------------------------------------------------------------------------------------------------------------------------------------------------------------------------------------------------------------------------------------------------------------------------------------------|
| Journal:                        | <i>BMJ Open</i>                                                                                                                                                                                                                                                                                                                                                                                                                                                                                                                                                                                                          |
| Manuscript ID                   | bmjopen-2019-031483.R2                                                                                                                                                                                                                                                                                                                                                                                                                                                                                                                                                                                                   |
| Article Type:                   | Research                                                                                                                                                                                                                                                                                                                                                                                                                                                                                                                                                                                                                 |
| Date Submitted by the Author:   | 20-Aug-2019                                                                                                                                                                                                                                                                                                                                                                                                                                                                                                                                                                                                              |
| Complete List of Authors:       | Cheng, Socheat; Akershus Univeristy Hospital, Health Services Research; University of Oslo, Institute of Clinical Medicine, Faculty of Medicine<br>Siddiqui,, Tahreem Ghazal; Akershus University Hospital, Health Services Research Unit<br>Gossop, Michael; University of Oslo, Centre for Addiction Research; National Addiction Centre,<br>Kristoffersen, Espen Saxhaug; University of Oslo, Department of General Practice, Institute of Health and Society<br>Lundqvist, Christofer; University of Oslo, Institute of Clinical Medicine, Campus Ahus; Akershus University Hospital, Health Service Research Centre |
| <b>Primary Subject Heading</b>: | Geriatric medicine                                                                                                                                                                                                                                                                                                                                                                                                                                                                                                                                                                                                       |
| Secondary Subject Heading:      | Addiction, Mental health, Patient-centred medicine, Pharmacology and therapeutics                                                                                                                                                                                                                                                                                                                                                                                                                                                                                                                                        |
| Keywords:                       | Characteristics, geriatric patients, risk factors, addiction, prescription drug abuse                                                                                                                                                                                                                                                                                                                                                                                                                                                                                                                                    |
|                                 |                                                                                                                                                                                                                                                                                                                                                                                                                                                                                                                                                                                                                          |

SCHOLARONE™  
Manuscripts

1  
2 1 **Sociodemographic, clinical and pharmacological profiles of medication misuse and**  
3 2 **dependence in hospitalized older patients in Norway: a prospective cross-sectional study**

4  
5 3  
6 4 **Socheat Cheng<sup>1,2</sup>, Tahreem Ghazal Siddiqui<sup>1,2</sup>, Michael Gossop<sup>3</sup>, Espen Saxhaug Kristoffersen<sup>1,4,5</sup>,**  
7 5 **Christofer Lundqvist<sup>1,2,4</sup>**  
8 6  
9 7

- 10 8  
11 8 1. Health Services Research Unit, Akershus Univeristy Hospital, PO Box 1000, 1478  
12  
13 9 Lorenskog, Norway  
14  
15 10 2. Institute of Clinical Medicine, Campus Ahus, Faculty of Medicine, University of Oslo, PO  
16 10  
17 Box 1000, 1478 Lorenskog, Norway  
18 11  
19 12 3. National Addiction Centre, Institute of Psychiatry, Psychology and Neuroscience, King's  
20 12  
21 College London, PO Box 48, 4 Windsor Walk, London SE5 8AF, UK  
22 13  
23 14 4. Department of Neurology, Akershus Univeristy Hospital, PO Box 1000, 1478 Lorenskog,  
24  
25 14 Norway  
26  
27 15 5. Department of General Practice, Institute of Health and Society, University of Oslo, 1130  
28  
29 16 Blindern 0318, Oslo, Norway  
30  
31  
32 17

33  
34 18 **Email address of each author:**

35 19 Socheat Cheng: Socheat.Cheng@ahus.no  
36 19  
37 20 Tahreem Ghazal Siddiqui: Tahreem.Ghazal.Siddiqui@ahus.no  
38 20  
39 21 Michael Gossop: michael.gossop@kcl.ac.uk  
40 21  
41 22 Espen Saxhaug Kristoffersen: e.s.kristoffersen@medisin.uio.no  
42 22  
43 23 Christofer Lundqvist: a.c.lundqvist@medisin.uio.no  
44 23  
45 24

46 25 **Corresponding author:**

47 26 Socheat Cheng,  
48 26  
49 27 Health Services Research Unit (HØKH),  
50 27  
51 28 Akershus University Hospital,  
52 28  
53 29 PO Box 1000,  
54 29  
55 30 1478 Lorenskog,  
56 30  
57 31 Norway  
58 32 Tel: +47 679 687 09  
59 32  
60 33 E-mail: Socheat.Cheng@ahus.no

## 1 ABSTRACT

### 2 Objectives

3 Timely recognition of medication misuse and dependence is crucial to avoid both adverse drug  
4 events and increasing health expenditure. Yet, the detection of these disorders in older people  
5 remains challenging due to the paucity of evidence on characteristics of patients at risk. This study  
6 investigates sociodemographic, pharmacological and clinical characteristics and factors associated  
7 with prolonged medication use, misuse and dependence in hospitalized older patients, focusing on  
8 three commonly prescribed central nervous system depressants (CNSDs): opioid analgesics,  
9 benzodiazepines and z-hypnotics.

### 10 Design

11 A prospective cross-sectional study, complying with the Strengthening the Reporting of  
12 Observational Studies in Epidemiology (STROBE) guidelines

### 13 Setting

14 Somatic departments of the Akershus University Hospital, Norway

### 15 Participants

16 246 patients aged 65-90 were included.

### 17 Outcome measures

18 Prolonged use was defined as using CNSDs for  $\geq 4$  weeks. Misuse and dependence were assessed  
19 with DSM-IV criteria for substance abuse and dependence. We used descriptive statistics to report  
20 patients' characteristics and logistic regression to demonstrate factors associated with prolonged  
21 use, and misuse or dependence.

### 22 Results

23 Forty percent of participants reported using CNSDs for  $\geq 4$  weeks. The odds of prolonged use were  
24 higher for patients aged 75-84 (OR=2.32, 95%CI: 1.16-4.65) and  $\geq 85$  (OR=3.33, 95%CI: 1.25-  
25 8.87) versus  $<75$  years, for pain intensity (OR=1.02, 95%CI: 1.01-1.04) and polypharmacy versus

1 no polypharmacy (OR=5.16, 95%CI: 2.13-12.55). The odds were lower for patients who completed  
2 secondary education (OR= 0.33, 95%CI: 0.13-0.83) compared to those with only basic education.  
3  
4  
5  
6  
7  
8  
9  
10  
11  
12  
13  
14  
15  
16  
17  
18  
19  
20  
21  
22  
23  
24  
25  
26  
27  
28  
29  
30  
31  
32  
33  
34  
35  
36  
37  
38  
39  
40  
41  
42  
43  
44  
45  
46  
47  
48  
49  
50  
51  
52  
53  
54  
55  
56  
57  
58  
59  
60

## 5 **Conclusion**

6 CNSD overuse is prevalent among hospitalized older patients, despite clear guidelines and  
7 recommendations. Our findings underline a need for stronger focus on responsible prescribing,  
8 timely detection and prevention of this issue, with special attention towards older patients, those  
9 with enhanced pain, polypharmacy and/or concurrent use of several CNSDs.

10  
11 **Key words:** characteristics, geriatric patients, risk factors, addiction, prescription drug abuse

12 **Trial registration:** ClinicalTrials.gov Identifier: NCT03162081. Registered 3 May 2017

## 13 14 **Strengths and limitations of this study**

- 15 • The first and comprehensive study of characteristics and factors associated with commonly  
16 prescribed central nervous system depressants (CNSDs) prolonged use, misuse, and  
17 dependence in older hospitalized patients.
- 18 • Characteristics of at-risk patients and significant associations revealed in this study can be  
19 used to inform ways for implementing future research initiatives and interventions aiming at  
20 early detection, prevention and treatment for CNSD overuse among older patients.
- 21 • We used validated and generally accepted diagnostic criteria to assess medication misuse  
22 and dependence in older patients (DSM-IV criteria for substance abuse and dependence)
- 23 • The use of cross-sectional data and a hospital-based sample precludes us from inferring  
24 causal relationships and generalizing the study findings to the general population.

## 1 INTRODUCTION

2 Central nervous system depressants (CNSDs) such as opioid analgesics, benzodiazepines and z-  
3 hypnotics are commonly prescribed among older patients for the treatment of chronic pain, anxiety  
4 and insomnia. While these medications are essential for moderate-severe cases, long-term use is not  
5 recommended owing to the risk of adverse events, including hyperalgesia, fractures, falls, cognitive  
6 impairment and dependence.<sup>1-3</sup> This underlines the importance of rational use and prescription of  
7 CNSDs for older patients. To achieve this, one of the practical steps is for clinicians to be able to  
8 timely recognize older patients at risk or suffering from medication misuse and dependence.

9 According to the Norwegian Prescription Database, the consumption of potentially addictive  
10 drugs such as opioid analgesics (i.e. oxycodone and tramadol), benzodiazepines (i.e. diazepam,  
11 oxazepam and nitrazepam) and z-hypnotics (i.e. zopiclone and zolpidem) is high among individuals  
12 aged 65 and older. These drugs were among the 30 most commonly prescribed drugs to older  
13 patients in Norway in 2017.<sup>4</sup>

14 A Norwegian study showed that the patients' regular general practitioners (GPs) prescribed  
15 the largest proportion of addictive drugs to their older patients (77%) compared to other groups of  
16 physicians.<sup>5</sup> In line with this, another study, found that CNSDs were frequently prescribed by GPs  
17 in large quantities and through indirect contacts without consultation.<sup>6</sup> Both inappropriate  
18 prescribing and the high consumption of such addictive medications may put older patients at risk  
19 of medication misuse and dependence – a condition characterized by persistent and compulsive use  
20 of a medication despite impairment in physical, social and psychological health.<sup>7</sup>

21 Given the vulnerability to serious adverse effects and interactions as a result of age-related  
22 changes in pharmacokinetics and pharmacodynamics, timely recognition and treatment of  
23 medication misuse and dependence in older patients are crucial to ensure medication safety and to  
24 avoid increasing health expenditure.<sup>8</sup> Yet, the detection of these disorders in older people is  
25 challenging and requires both valid screening tools and evidence-based knowledge on long-term use

1  
2 1 of CNSDs, including patients' characteristics related to misuse and dependence.<sup>7,9</sup> Addressing these  
3  
4 2 knowledge gaps forms the basis for developing evidence-based intervention.  
5

6 3 This study intends to provide such information by investigating sociodemographic,  
7  
8 4 pharmacological and clinical characteristics and factors associated with prolonged medication use,  
9  
10 5 misuse and dependence in hospitalized older patients, focusing on three commonly prescribed  
11  
12 6 central nervous system depressants (CNSDs): opioid analgesics, benzodiazepines and z-hypnotics.  
13  
14  
15

16 7

## 18 8 **METHODS**

### 20 9 **Study design**

22  
23 10 The study was a prospective cross-sectional, in-hospital study and complied with the Strengthening  
24  
25 11 the Reporting of Observational Studies in Epidemiology (STROBE) guidelines.  
26

### 27 12 **Participants and setting**

29 13 The recruitment process took place between May 2017 and September 2018, at three somatic  
30  
31 14 departments of the Akershus University Hospital: Geriatrics, General Internal Medicine and  
32  
33 15 Neurology. The catchment area of the hospital covers roughly 10% of the total population of  
34  
35 16 Norway. Participants were recruited at the first few days of admission based on predefined  
36  
37 17 inclusion and exclusion criteria (NCT03162081), and not on their vulnerability, reasons for  
38  
39 18 admission, diagnosis or severity of disease. As Norway has an all-covering national health  
40  
41 19 insurance, all patients enter the hospital on the same conditions and with the same in-patient  
42  
43 20 threshold. The study inclusion criteria were hospitalized patients, aged between 65 and 90 years old.  
44  
45 21 The exclusion criteria included Mini-Mental State Examination (MMSE) score  $\leq 21$  (incapacity to  
46  
47 22 give informed consent);<sup>10,11</sup> pre-existing diagnosis of severe depression, stroke, dementia,  
48  
49 23 psychotic disorders; serious visual or hearing impairment; and insufficient Norwegian language, all  
50  
51 24 generally assumed to bias participants' responses on self-rated health questions. We precluded  
52  
53 25 participants who were in a too serious medical condition or palliative treatment, defined by  
54  
55 26 physicians at the study setting.  
56  
57  
58  
59  
60

## 1 **Data collection**

2 Data collection (by SC, TGS and CL) involved three steps. After consent had been given, all  
3  
4 eligible participants were asked to complete a questionnaire on sociodemographic background,  
5  
6 pain, anxiety and depression. At this stage, the investigators were blinded to the use of medications  
7  
8 as this was registered in the electronic patient record (EPR) which could only be accessed once a  
9  
10 written informed consent had been obtained. Having fulfilled this requirement, the EPRs were  
11  
12 reviewed to document the use of medications (type, duration, frequency and polypharmacy).  
13  
14 Finally, the presence of medication misuse or dependence among participants identified as  
15  
16 prolonged users of CNSDs was assessed through a structured interview. Prior to the start of the  
17  
18 study, the three data collectors had gone through training sessions in order to optimize congruent  
19  
20 use of the interview. More details on definition, data sources, and measurements for variables under  
21  
22 investigations are given in the section below. The questionnaire and interview guide used to collect  
23  
24 data from participants can be found in Additional file 1.

## 25 **Sociodemographic and clinical variables**

26 Sociodemographic variables included age (65-74, 75-84, and  $\geq 85$ ); sex (Male, Female); education  
27  
28 (basic, secondary, and higher education); annual income ( $<200\ 000$ ,  $200\ 000 - 349\ 000$ , and  $\geq$   
29  
30  $350\ 000$  Norwegian Krone (NOK) per year); and living alone (Yes, No). Clinical variables  
31  
32 consisted of pain intensity (continuous, measured using visual analog scale - VAS); Anxiety and  
33  
34 depressive symptoms were assessed with the Hospital Anxiety and Depression Scale (HADS).  
35  
36 Cronbach alpha coefficient for the HADS-anxiety and depression subscale, reported by Helvik et al.  
37  
38 (2011), was 0.78 and 0.71 respectively.<sup>12</sup> Optimal cut-off values for diagnosing anxiety and  
39  
40 depression in older hospitalized patients using HADS remain to be established.<sup>12 13</sup> To avoid  
41  
42 underestimation and misclassification bias of anxious and depressed individuals, we used anxiety  
43  
44 and depression scores as continuous variables. Higher scores indicate higher levels of anxiety and  
45  
46 depressive symptoms.<sup>14</sup> Data for all of these variables were collected through a self-completed  
47  
48 questionnaire.



1  
2  
3  
4  
5  
6  
7  
8  
9  
10  
11  
12  
13  
14  
15  
16  
17  
18  
19  
20  
21  
22  
23  
24  
25  
26  
27  
28  
29  
30  
31  
32  
33  
34  
35  
36  
37  
38  
39  
40  
41  
42  
43  
44  
45  
46  
47  
48  
49  
50  
51  
52  
53  
54  
55  
56  
57  
58  
59  
60

## 1 **Pharmacological variables**

2 We defined prolonged use of CNSDs as the use of opioid analgesics, benzodiazepines and/or z-  
3 hypnotics for four weeks or longer continuously up to the point of recruitment,<sup>15 16</sup> while non-  
4 prolonged use was non-use or use of these medications for less than four weeks. Medication misuse  
5 and dependence were defined based on DSM-IV criteria for substance abuse and dependence,  
6 through structured interviews, using the Norwegian version of the Mini-International  
7 Neuropsychiatric Interview Guide – MINI.<sup>17</sup> Dependence was defined to be present if patients met  
8 three or more of the dependence criteria. Misuse was confirmed if the dependence criteria were not  
9 met and the respondents satisfied one or more of the abuse criteria.<sup>18</sup> For the purpose of the present  
10 study, and as few patients fulfilled misuse criteria (n=6), misuse and dependence were grouped  
11 together as medication misuse or dependence (n=39). Other pharmacological variables entailed  
12 types of CNSD medications used (categorized as exclusive or concurrent use), duration of use  
13 (continuous, in week); frequency of use (categorized as sporadic use if the medication was taken  
14 intermittently < 5 days per week and as daily use if the medication was taken ≥ 5 days per week);  
15 Polypharmacy<sup>19</sup> (defined as the use of ≥5 medications daily, coded as Yes or No). The main source  
16 of pharmacological data was the EPR. We also sought to verify this against information from  
17 patients and GP referral documents. To ensure the accuracy of data on CNSD use patterns, we  
18 checked for evidence of use and consistency across prescriptions and relevant documents reported  
19 from both primary care and hospital settings.

## 20 **Statistical analysis**

21 We analyzed characteristics of older patients with and without prolonged use, and that of those with  
22 and without misuse or dependence using descriptive statistics. We assessed the associations  
23 between patient characteristics and the presence of prolonged CNSD use, and misuse or dependence  
24 using bivariate and multiple logistic regression analyses. The analyses included adjustment for  
25 sociodemographic subgroups (age groups, sex, education, annual income, living alone), clinical  
26 (pain intensity, anxiety and depression scores) and pharmacological variables (polypharmacy,

1 duration and concurrent use of CNSDs). Multiple imputations, under the missing at random  
2 assumption, using chained equations (with 20 imputed data sets) were performed to handle missing  
3 data. Sensitivity analyses were conducted for the same models using complete case analysis  
4 (individuals with missing data are excluded). No multicollinearity was detected. Stata-SE software  
5 version 15 was used for all statistical analyses.<sup>20</sup>

## 6 **Patient and public involvement**

7 A user advisory board established at the Akershus University Hospital (the study setting), which  
8 included both representatives of older patients and health service officials, supported this study. The  
9 board met on a regular basis throughout the study period. They provided project-specific inputs on  
10 ethics, design and methodology as well as highlighted research focus based on patient and public  
11 interests. They will also be involved in the dissemination of the findings.

## 13 **RESULTS**

### 14 **Participants**

15 In total, we consecutively approached 665 adults aged 65-90. Of these, 227 participants declined to  
16 participate, while 92 others were precluded due to either being in a too serious medical condition or  
17 palliative treatment. Of the remaining patients, 100 were excluded based on predefined exclusion  
18 criteria. This resulted in 246 older patients eligible for the study, of which 100 were thereafter  
19 identified as prolonged users of CNSDs ( $\geq$  four weeks). Figure 1 provides more details on the flow  
20 of participants through the study.

21 There were no missing data in the variables: prolonged use, misuse or dependence,  
22 concurrent use, duration of CNSD use, age groups, sex, living alone and polypharmacy. The  
23 following variables had missing data: pain intensity 7% (18/246), anxiety scores 7% (17/246),  
24 depression scores 7% (17/246), education 6% (14/246), and income 16% (39/246).

## 1 Descriptive data

2 Overall, in descriptive analyses, older patients with prolonged use of CNSDs were more often  
 3 female, aged 75-85, living alone, with lower socioeconomic status (completed  $\leq$  secondary  
 4 education and earned  $<$  350000 NOK/year), polypharmacy and accompanied by higher pain  
 5 intensity and depression scores (Table 1). Patients screening positive on misuse or dependence were  
 6 mainly those living alone (69%) and those on exclusive use of CNSDs (54%). More details on  
 7 patient characteristics are provided in Table 1.

8 **Table 1.** Patient characteristics

| Patient characteristics                             | Prolonged use of CNSDs |                | CNSD misuse or dependence |               |
|-----------------------------------------------------|------------------------|----------------|---------------------------|---------------|
|                                                     | No (n=146)             | Yes (n=100)    | No (n=61)                 | Yes (n=39)    |
| <b>Sex</b>                                          |                        |                |                           |               |
| Female                                              | 71 (49%)               | 66 (66%)       | 38 (62%)                  | 28 (72%)      |
| Male                                                | 75 (51%)               | 34 (34%)       | 23 (38%)                  | 11 (28%)      |
| <b>Age groups</b>                                   |                        |                |                           |               |
| 65-74                                               | 73 (50%)               | 28 (28%)       | 18 (29%)                  | 10 (25%)      |
| 75-84                                               | 59 (40%)               | 51 (51%)       | 34 (56%)                  | 17 (44%)      |
| $\geq$ 85                                           | 14 (10%)               | 21 (21%)       | 9 (15%)                   | 12 (31%)      |
| <b>Education, years</b>                             |                        |                |                           |               |
| Basic education ( $\leq$ 10)                        | 16 (12%)               | 30 (32%)       | 17 (29%)                  | 13 (36%)      |
| Secondary education (11-13)                         | 64 (46%)               | 31 (33%)       | 21 (36%)                  | 10 (28%)      |
| Higher education ( $\geq$ 14)                       | 58 (42%)               | 33 (35%)       | 20 (35%)                  | 13 (36%)      |
| <b>Income (NOK/year)</b>                            |                        |                |                           |               |
| $<$ 200 000                                         | 8 (7%)                 | 13 (15%)       | 7 (14%)                   | 6 (18%)       |
| 200 000–349 000                                     | 42 (34%)               | 43 (51%)       | 24 (46%)                  | 19 (58%)      |
| $\geq$ 350 000                                      | 72 (59%)               | 29 (34%)       | 21 (40%)                  | 8 (24%)       |
| <b>Living alone</b>                                 |                        |                |                           |               |
| No                                                  | 87 (60%)               | 45 (45%)       | 33 (54%)                  | 12 (31%)      |
| Yes                                                 | 59 (40%)               | 55 (55%)       | 28 (46%)                  | 27 (69%)      |
| <b>Polypharmacy (<math>\geq</math> 5 drugs/day)</b> |                        |                |                           |               |
| No                                                  | 55 (38%)               | 8 (8%)         | 6 (10%)                   | 2 (5%)        |
| Yes                                                 | 91 (62%)               | 92 (92%)       | 55 (90%)                  | 37 (95%)      |
| <b>Anxiety scores (HADS-A)</b>                      |                        |                |                           |               |
| Mean (SD)                                           | 4.13 (3.28)            | 4.97 (3.91)    | 4.47 (3.54)               | 5.68 (4.34)   |
| Median (Range)                                      | 4 (0-14)               | 4 (0-16)       | 4 (0-16)                  | 5 (0-15)      |
| <b>Depression scores (HADS-D)</b>                   |                        |                |                           |               |
| Mean (SD)                                           | 3.60 (2.98)            | 5.13 (3.49)    | 4.89 (3.26)               | 5.49 (3.81)   |
| Median (Range)                                      | 3 (0-13)               | 4 (0-15)       | 4 (0-12)                  | 5 (0-15)      |
| <b>Pain intensity</b><br>(millimeters on VAS scale) |                        |                |                           |               |
| Mean (SD)                                           | 18.07 (24.21)          | 35.20 (30.35)  | 30.56 (28.30)             | 42.08 (32.34) |
| Median (Range)                                      | 7 (0-91)               | 29.50 (0-97)   | 27 (0-97)                 | 48 (0-93)     |
| <b>Duration of CNSD use (weeks)</b>                 |                        |                |                           |               |
| Mean (SD)                                           | -                      | 71.47 (113.44) | 72.10 (138.38)            | 70.48 (57.36) |

|                                        |   |               |            |            |
|----------------------------------------|---|---------------|------------|------------|
| Median (Range)                         |   | 50.50 (4-988) | 33 (4-988) | 52 (4-232) |
| <b>Concurrent use (of &gt;1 CNSDs)</b> |   |               |            |            |
| No (exclusive use)                     | - | 70 (70%)      | 49 (80%)   | 21 (54%)   |
| Yes                                    | - | 30 (30%)      | 12 (20%)   | 18 (46%)   |

Abbreviations:

CNSD – central nervous system depressant drugs;

HADS–D/A – hospital anxiety and depression scale, depression or anxiety subscore.

1

## 2 Medication use patterns

3 Forty percent (100 out of 246 participants) of the older patients enrolled in this study were  
 4 identified as prolonged users ( $\geq 4$  weeks) of opioid analgesics, benzodiazepines and/or z-hypnotics.  
 5 The dominant group of medications was Z-hypnotics, accounting for 42% (42/100) as exclusive use  
 6 and 26% (26/100) as concurrent use of Z-hypnotics plus other CNSDs, followed by opioid  
 7 analgesics, which comprised 21% (21/100) as exclusive use and 23% (23/100) as concurrent use.  
 8 Benzodiazepines were less commonly used and constituted 7% (7/100) as exclusive use and 13%  
 9 (13/100) as concurrent use. 30% (30/100) of the prolonged users in our sample concurrently  
 10 consumed two or more different types of CNSDs. The most prevalent pattern of concurrent use was  
 11 the combination of z-hypnotics and opioid analgesics, amounting to 57% (17/30) of all forms of  
 12 current use.

13 The majority of older patients using CNSDs, did so on long-term and daily basis. The  
 14 medians for duration of use for opioid analgesics, benzodiazepines and z-hypnotics were 42 (4-  
 15 988), 51 (4-208) and 52 (4-232) weeks respectively. More than half of the prolonged users reported  
 16 using these medications daily (5-7 days per week): opioid analgesics (26/44), benzodiazepines  
 17 (15/20) and/or z-hypnotics (51/68).

18 Among all the prolonged users of CNSDs, 39% (39/100) met the DSM-IV criteria for  
 19 substance abuse or dependence. The non-mutually exclusive proportion of misuse or dependence  
 20 for opioid analgesics, benzodiazepines and z-hypnotics were 30% (13/44), 40% (8/20) and 41%  
 21 (28/68) respectively.

22

23

1

2

3

4

5

6

7

8

9

10

11

12

13

14

15

16

17

18

19

20

21

22

23

24

25

26

27

28

29

30

31

32

33

34

35

36

37

38

39

40

41

42

43

44

45

46

47

48

49

50

51

52

53

54

55

56

57

58

59

60

## 1 Factors associated with prolonged use of CNSDs

2 In the multivariate model, factors associated with increasing odds for prolonged use of CNSDs  
3 included being aged 75-84 (OR= 2.32, 95%CI: 1.16-4.65) and  $\geq 85$  years old (OR= 3.33, 95%CI:  
4 1.25-8.87) compared to age <75; having more intense pain according to the VAS scale (OR=1.02,  
5 95%CI: 1.01-1.04) and polypharmacy (OR=5.16, 95%CI: 2.13-12.55). On the contrary, the odds  
6 were lower among patients who had completed at least secondary education (OR= 0.33, 95%CI:  
7 0.13-0.83) compared to only basic education (Table 2). In the sensitivity analysis using complete  
8 case analysis, the associations between these factors and the prolonged use of CNSDs remained  
9 significant (Additional file 2). Sex, income, anxiety and depression scores were not significantly  
10 associated with prolonged use of CNSDs.

11 **Table 2.** Logistic regression models for factors associated with prolonged use of CNSDs –  
12 estimated using multiple imputations.

13

| Independent variable           | Bivariate model  |              | Multivariate model  |             |
|--------------------------------|------------------|--------------|---------------------|-------------|
|                                | OR (95%CI)       | P-value      | Adjusted OR (95%CI) | P-value     |
| <b>Sex</b>                     |                  |              |                     |             |
| Male                           | 1                |              | 1                   |             |
| Female                         | 2.05 (1.21-3.47) | <b>0.007</b> | 1.56 (0.80-3.02)    | 0.19        |
| <b>Age groups, years</b>       |                  |              |                     |             |
| 65-74                          | 1                |              | 1                   |             |
| 75-84                          | 2.25 (1.27-4.00) | <b>0.006</b> | 2.32 (1.16-4.65)    | <b>0.02</b> |
| $\geq 85$                      | 3.91 (1.75-8.74) | <b>0.001</b> | 3.33 (1.25-8.87)    | <b>0.02</b> |
| <b>Education, years</b>        |                  |              |                     |             |
| Basic education ( $\leq 10$ )  | 1                |              | 1                   |             |
| Secondary education (11-13)    | 0.29 (0.14-0.60) | <b>0.001</b> | 0.33 (0.13-0.83)    | <b>0.02</b> |
| Higher education ( $\geq 14$ ) | 0.34 (0.16-0.71) | <b>0.004</b> | 0.45 (0.18-1.12)    | 0.09        |
| <b>Income (NOK/year)</b>       |                  |              |                     |             |
| < 200 000                      | 1                |              | 1                   |             |
| 200 000 – 349 000              | 0.73 (0.27-1.93) | 0.52         | 0.67 (0.20-2.24)    | 0.52        |
| $\geq 350 000$                 | 0.33 (0.12-0.88) | <b>0.03</b>  | 0.35 (0.10-1.23)    | 0.10        |
| <b>Living alone</b>            |                  |              |                     |             |
| No                             | 1                |              | 1                   |             |
| Yes                            | 1.80 (1.08-3.01) | <b>0.03</b>  | 0.94 (0.47-1.88)    | 0.86        |

**Polypharmacy ( $\geq 5$  drugs/day)**

|                                                     |                   |                  |                   |                  |
|-----------------------------------------------------|-------------------|------------------|-------------------|------------------|
| No                                                  | 1                 |                  | 1                 |                  |
| Yes                                                 | 6.95 (3.13-15.41) | <b>&lt;0.001</b> | 5.16 (2.13-12.55) | <b>&lt;0.001</b> |
| <b>Anxiety scores (HADS-A)</b>                      | 1.06 (0.98-1.14)  | 0.14             | 1.01 (0.91-1.13)  | 0.80             |
| <b>Depression scores (HADS-D)</b>                   | 1.14 (1.05-1.24)  | <b>0.002</b>     | 1.08 (0.95-1.22)  | 0.21             |
| <b>Pain intensity</b><br>(millimeters on VAS scale) | 1.02 (1.01-1.03)  | <b>&lt;0.001</b> | 1.02 (1.01-1.04)  | <b>&lt;0.001</b> |

Abbreviations:

CNSD – central nervous system depressant drugs

HADS–D/A – hospital anxiety and depression scale, depression or anxiety subscore.

**Factors associated with CNSD misuse or dependence**

Table 3 shows results of bivariate and multiple logistic regression analyses of factors associated with CNSD misuse or dependence, estimated using multiple imputations. We found that concurrent use of CNSDs and pain intensity had a significant association with misuse or dependence. In the multivariate model, we found that compared to exclusive use, concurrent use of two or more CNSDs increased the odds for misuse or dependence by 4 times (OR= 3.99, 95%CI: 1.34-11.88). Moreover, as pain intensity increased by 1 millimeter on 100 mm VAS scale, the odds for misuse or dependence increased by 1.02 units (OR= 1.02, 95%CI: 1.01-1.04). Sensitivity analysis using complete case analysis yield consistent results (Additional file 2).

**Table 3.** Logistic regression models for factors associated with CNSD misuse or dependence – estimated using multiple imputations.

| Independent variables         | Bivariate model  |         | Multivariate model  |         |
|-------------------------------|------------------|---------|---------------------|---------|
|                               | OR (95%CI)       | P-value | Adjusted OR (95%CI) | P-value |
| <b>Sex</b>                    |                  |         |                     |         |
| Male                          | 1                |         | 1                   |         |
| Female                        | 1.54 (0.65-3.67) | 0.33    | 1.13 (0.39-3.21)    | 0.83    |
| <b>Age, years</b>             |                  |         |                     |         |
| 65-74                         | 1                |         | 1                   |         |
| 75-84                         | 0.90 (0.34-2.37) | 0.83    | 1.37 (0.42-4.50)    | 0.60    |
| $\geq 85$                     | 2.40 (0.75-7.65) | 0.14    | 2.30 (0.56-9.45)    | 0.25    |
| <b>Education, years</b>       |                  |         |                     |         |
| Basic education ( $\leq 10$ ) | 1                |         | 1                   |         |
| Secondary education (11-13)   | 0.61 (0.22-1.72) | 0.35    | 0.84 (0.23-3.03)    | 0.78    |

|                                                     |                   |              |                   |             |
|-----------------------------------------------------|-------------------|--------------|-------------------|-------------|
| Higher education ( $\geq 14$ )                      | 0.86 (0.32-2.34)  | 0.77         | 1.09 (0.31-3.81)  | 0.89        |
| <b>Income (NOK/year)</b>                            |                   |              |                   |             |
| < 200 000                                           | 1                 |              | 1                 |             |
| 200 000 – 349 000                                   | 0.85 (0.24-2.98)  | 0.80         | 1.26 (0.26-6.26)  | 0.77        |
| $\geq 350 000$                                      | 0.49 (0.13-1.88)  | 0.30         | 0.73 (0.11-4.83)  | 0.75        |
| <b>Living alone</b>                                 |                   |              |                   |             |
| No                                                  | 1                 |              | 1                 |             |
| Yes                                                 | 2.65 (1.14-6.18)  | <b>0.02</b>  | 2.06 (0.65-6.48)  | 0.22        |
| <b>Polypharmacy (<math>\geq 5</math> drugs/day)</b> |                   |              |                   |             |
| No                                                  | 1                 |              | 1                 |             |
| Yes                                                 | 2.02 (0.39-10.55) | 0.41         | 1.88 (0.25-14.21) | 0.54        |
| <b>Concurrent use (of &gt;1 CNSDs)</b>              |                   |              |                   |             |
| No (exclusive use)                                  | 1                 |              | 1                 |             |
| Yes                                                 | 3.5 (1.44-8.54)   | <b>0.006</b> | 3.99 (1.34-11.88) | <b>0.01</b> |
| <b>Duration of CNSD use (weeks)</b>                 | 1.00 (0.99-1.00)  | 0.94         | 1.00 (0.99-1.00)  | 0.33        |
| <b>Anxiety scores (HADS-A)</b>                      | 1.08 (0.97-1.21)  | 0.14         | 1.06 (0.88-1.26)  | 0.55        |
| <b>Depression scores (HADS-D)</b>                   | 1.05 (0.93-1.19)  | 0.41         | 0.99 (0.81-1.20)  | 0.90        |
| <b>Pain intensity (millimeters, VAS scale)</b>      | 1.01 (0.99-1.03)  | 0.08         | 1.02 (1.01-1.04)  | <b>0.04</b> |

Abbreviations: CNSD – central nervous system depressant drugs; HADS–D/A – hospital anxiety and depression scale, depression or anxiety subscore.

## DISCUSSION

Our study shows that prolonged, concurrent and daily use of CNSDs is prevalent among hospitalized older patients. Z-hypnotics were the most commonly used drugs, both in exclusive and concurrent use patterns (with other CNSDs). In this particular group of patients, the presence of prolonged CNSD use was more common among patients with the following characteristics: being female, aged 75-84 years old, living alone, with lower socioeconomic status, polypharmacy, higher pain intensity and depression scores. Patients with misuse or dependence, according to DSM-IV criteria, were mainly those living alone and those on exclusive use of CNSDs. The odds for prolonged CNSD use were higher among patients aged  $\geq 75$  years old and those with higher pain intensity and polypharmacy. Having completed secondary education was protective against the

1  
2 1 prolonged use. In older patients, enhanced pain and concurrent use of  $\geq 2$  different types of CNSDs,  
3  
4 2 rather than the duration of use increased the likelihood of misuse or dependence.  
5

6 3 One of the strengths of this study is that it provides evidence on characteristics of older  
7  
8 4 patients with prolonged CNSD use, misuse, and dependence, from many different aspects  
9  
10 5 (sociodemographic, pharmacological and clinical profiles). We adhered strictly to the STROBE  
11  
12 6 reporting guidelines, ethical standards, and outcome measures were predefined (NCT03162081).  
13  
14 7 Moreover, we used validated and generally accepted criteria (DSM-IV criteria) to assess medication  
15  
16 8 misuse and dependence in older patients. Nonetheless, the study has some limitations. We  
17  
18 9 acknowledge that the use of a consecutive hospital-based sample represents a limitation regarding  
19  
20 10 generalizability of the study findings to the general population. However, our study should be  
21  
22 11 reasonably representative for somatic hospital populations of older people. We suggest that  
23  
24 12 hospitals may be good settings for conducting research on medication-related problems as they  
25  
26 13 represent settings where older patients often get their medication regimens changed and also where  
27  
28 14 they may therefore be at risk for adverse drug events and, consequently, where this focus is  
29  
30 15 important. Furthermore, it has recently been pointed out that long-term use of benzodiazepine/z-  
31  
32 16 hypnotics often started in hospitals and the prescription is continued by GPs.<sup>21</sup> Another issue, which  
33  
34 17 suggests some care in interpretation of our results, is the relatively high number of patients that  
35  
36 18 declined participation. It may be that those who declined represent either those with the most  
37  
38 19 serious medical conditions or those that were not interested in being queried regarding their  
39  
40 20 medication use, thus suggesting that our sample may be somewhat biased towards milder cases. In  
41  
42 21 addition, the use of cross-sectional data precludes us from inferring causality of the observed  
43  
44 22 associations.  
45  
46 23  
47  
48 24  
49  
50 25  
51  
52 26

52 23 Our study delivers a number of new and important insights pertaining to medication misuse  
53  
54 24 and dependence in older patients. First, our study showed that concurrent use of CNSDs is still  
55  
56 25 common among older patients. This is despite recommendations specified in the national treatment  
57  
58 26 guidelines and evidence on the risk of fatal overdose.<sup>22-26</sup> Second; we comprehensively explored  
59  
60



1  
2 1 patient characteristics associated with the presence of CNSD prolonged use among hospitalized  
3  
4 2 older patients, which may be useful for raising the awareness of patient groups that may be at  
5  
6 3 increased risk.

8  
9 4 Among geriatric patients, age-related pharmacokinetic and pharmacodynamics changes, chronic  
10  
11 5 diseases, polypharmacy, and cognitive impairment can all interact and lead to greater vulnerability  
12  
13 6 to harmful effects of medication overuse. According to both the national (NORGE) and  
14  
15 7 international (Beers and STOPP) criteria<sup>27-29</sup> and treatment guidelines,<sup>22 23</sup> opioid analgesics,  
16  
17 8 benzodiazepines and z-hypnotics are all classified as inappropriate drugs for older patients and  
18  
19 9 should not be used on a long-term basis. Our findings are consistent with three studies previously  
20  
21 10 conducted in Norway<sup>6 16 30</sup> and suggest that today's prescribing behavior is suboptimal and that  
22  
23 11 more in-depth research and educational interventions are needed.<sup>31 32</sup>

26  
27 12 Problematic patterns of CNSD use may derive from different underlying factors.  
28  
29 13 Overprescribing is often unintentional, due to lenient prescribing or unawareness among prescribers  
30  
31 14 about the uncertainty of long-term efficacy of CNSDs.<sup>33 34</sup> Another factor may be the failure to  
32  
33 15 recognize at-risk patients, which may be a consequence of lacking validated instruments. Apart  
34  
35 16 from this, doctor-patient communication may also play a role. Messages on the importance of  
36  
37 17 adherence in order to avoid harmful effects of medication overuse, for instance, may not be  
38  
39 18 conveyed effectively to older patients. For the older patient counterpart, potential barriers in  
40  
41 19 understanding and adhering to medical advice may include cognitive impairment, low health  
42  
43 20 literacy and lack of family/social support.<sup>35 36</sup> Furthermore, older patients may hold opposing  
44  
45 21 attitudes regarding the discontinuation of CNSD use,<sup>21</sup> if adverse effects are under-emphasized and  
46  
47 22 hopes of attaining freedom from unnecessary pain, anxiety and sleep disturbances in old age based  
48  
49 23 only on medications are over-stated. Physicians may also experience other challenges in managing  
50  
51 24 CNSD use.<sup>37</sup> Both the magnitude and impacts of such underlying factors on the prolonged use of  
52  
53 25 CNSDs in older patients remain poorly understood, and should therefore be elaborated in future  
54  
55 26 research.

60

1  
2 1 Also of note, we found that the concurrent use of CNSDs significantly increased the odds  
3  
4 2 for misuse or dependence in older patients, even adjusted for patients' socio-demographic  
5  
6 3 background and clinically important covariates such as duration of CNSD use and intensity of pain,  
7  
8 4 anxiety and depressive symptoms (Table 3). This finding suggests that co-prescribing of CNSDs for  
9  
10 5 older patients should be done with great care. Moreover, the present study points out a significant  
11  
12 6 association between polypharmacy and CNSD prolonged use in older patients. This, to our  
13  
14 7 knowledge, has not been explored by previous research. Such associations can be explained by  
15  
16 8 several factors. Studies suggest that polypharmacy is associated with the co-occurrence of anxiety,  
17  
18 9 sleep difficulties and discomforts,<sup>38-40</sup> and might through unknown side-effects aggravate these  
19  
20 10 conditions, in turn leading to more CNSDs being prescribed for symptom relief.<sup>41</sup>  
21  
22  
23  
24

25 11 Pertaining to our finding that living alone in old age is not associated with medication  
26  
27 12 prolonged use and misuse or dependence, previous research yielded inconsistent results. Some  
28  
29 13 reported that older adults who lived alone had significantly poorer sleep quality and tended to use  
30  
31 14 more hypnotic drugs<sup>42 43</sup> whereas others claimed that living alone is not associated with or even  
32  
33 15 reduced the risk of long-term use of benzodiazepine and z-hypnotics.<sup>44-46</sup> The issue clearly deserves  
34  
35 16 further focus.  
36  
37  
38

39 17 Finally, we found that pain intensity has a highly significant relationship with both  
40  
41 18 prolonged use and misuse or dependence. This may suggest that pain intensity drives problematic  
42  
43 19 use of CNSDs. However, another possibility is that prolonged opioid use does not contribute to  
44  
45 20 improving pain. That opioid-induced hyperalgesia may worsen pain is well-known among younger  
46  
47 21 chronic opioid users.<sup>47-48</sup> However, whether pain may indeed be worsened also by prolonged CNSD  
48  
49 22 use among older patients, remains to be studied. Notably, anxiety and depression, known to be  
50  
51 23 associated with pain intensity, were not, in our study, associated with prolonged CNSD use and  
52  
53 24 misuse or dependence, even though they were reported to be common among chronic z-hypnotics  
54  
55 25 users (the major medication used in our sample).<sup>49 50</sup> The interrelationship between pain, anxiety and  
56  
57  
58  
59  
60

1  
2 1 depression is complex.<sup>51 52</sup> Future prospective studies over time are therefore needed to explain the  
3  
4 2 interplay between these entities and their influences on CNSD dependence.  
5

6 3 In conclusions, CNSD overuse (prolonged use, misuse and dependence) is still prevalent  
7  
8 4 among hospitalized older patients, despite clear guidelines and recommendations. Our findings  
9  
10 5 underline a need for stronger focus on responsible prescribing, timely detection and prevention of  
11  
12 6 medication misuse and dependence, with special attention towards older patients, those with  
13  
14 7 enhanced pain, polypharmacy and/or concurrent use of several CNSDs.  
15  
16  
17  
18  
19

## 20 9 **Acknowledgements**

21  
22 10 We express our appreciation to all participants for spending their time and effort on this study. We  
23  
24 11 are thankful to all medical staff at the three departments of Akershus University Hospital  
25  
26 12 (Geriatrics, Neurology and Endocrinology) for facilitating the data collection process. We also  
27  
28 13 gratefully acknowledge the statistical support of Professor Jurate Š. Benth.  
29  
30  
31  
32  
33

## 34 15 **Funding**

35  
36 16 This study was funded by a grant from the Norwegian Research Council (Project number 256431),  
37  
38 17 the University of Oslo and the Health Services Research Unit of the Akershus University Hospital.  
39  
40 18 The funders had no role in study design, data collection and analysis, decision to publish or  
41  
42 19 preparation of the manuscript.  
43  
44  
45  
46  
47

## 48 21 **Authors' contributions**

49  
50 22 CL conceptualized, designed and led the study. SC, ESK and CL drafted the study protocol. SC  
51  
52 23 customized the protocol, recruited participants, collected and analyzed data, and drafted this  
53  
54 24 manuscript. TGS was involved in the recruitment and data collection process. MG contributed to  
55  
56 25 the study conception and design. All authors took part in project planning and were involved in the  
57  
58 26 refinement and approval of the final version of this manuscript.  
59  
60

## 1 **Competing interests**

2 In addition to the funding given above, Dr. Lundqvist reports having received research grants from  
3 the South-East Regional Health authority, during the conduct of the study as well as grants and  
4 personal fees from Abbvie pharma AS and Roche Norway AS, outside this submitted work. These  
5 funders have no role in study design, data collection and analysis, decision to publish or preparation  
6 of the manuscript. Other authors declared no conflicts of interest.

## 7 **Patient consent for publication**

8 Not required.

## 9 **Ethics**

10 Ethical approval was obtained from the Regional Committee for Medical Research Ethics – South  
11 East Norway (Reference number: 2016/2289/REK sør-øst) and the Data Protection Office at  
12 Akershus University Hospital (Reference number: 17-054). All participants provided written  
13 informed consents. Data handling was done accordingly.

## 14 **Data sharing statement**

15 The datasets analyzed during this study are not publicly available due to threats to subject privacy  
16 but are available from the corresponding author on reasonable request.

**REFERENCES**

1. World Health Organization. Lexicon of alcohol and drug terms. Geneva: World Health Organization;1994.
2. Del Carmen Panini A, Teves MR, Giraudo E, et al. Psychotropic Medication Use in the Elderly. In: Gargiulo PÁ, Mesones-Arroyo HL, eds. Psychiatry and Neuroscience Update - Vol II: A Translational Approach. Cham: Springer International Publishing, 2017:293-306.
3. Chu LF, Angst MS, Clark D. Opioid-induced hyperalgesia in humans: molecular mechanisms and clinical considerations. *The Clinical journal of pain* 2008;**24**(6):479-96.
4. Berg C, Blix HS, Fenne O, Furu K, Hjellvik V, Husabø KJ, et al. Drug use in the elderly. Norwegian Prescription Database 2013–2017. Oslo: Norwegian Institute of Public Health; 2018.
5. Kann IC, Lundqvist C, Lurås H. Prescription of addictive and non-addictive drugs to home-dwelling elderly. *Drugs & aging* 2014;**31**(6):453-59.
6. Sundseth AC, Gjelstad S, Straand J, et al. General practitioners' prescriptions of benzodiazepines, Z-hypnotics and opioid analgesics for elderly patients during direct and indirect contacts. A cross-sectional, observational study. *Scandinavian journal of primary health care* 2018;**36**(2):115-22.
7. Cheng S, Siddiqui TG, Gossop M, Kristoffersen ES, Lundqvist C. The severity of dependence scale detects medication misuse and dependence among older hospitalized patients. Revised manuscript submitted to *BMC Geriatrics*. 2019
8. Heider D, Matschinger H, Meid AD, et al. Health service use, costs, and adverse events associated with potentially inappropriate medication in old age in Germany: retrospective matched cohort study. *Drugs & aging* 2017;**34**(4):289-301.
9. Levesque A, Nunes EV. Addiction in the Older Patient. *Recognizing Addiction in Older Patients*, 2016.
10. Karlawish J. Measuring decision-making capacity in cognitively impaired individuals. *Neurosignals*. 2008;**16**(1):91-8.
11. Folstein MF, Folstein SE, McHugh PR. "Mini-mental state". A practical method for grading the cognitive state of patients for the clinician. *Journal of psychiatric research*. 1975 Nov;**12**(3):189-98.
12. Helvik AS, Engedal K, Skancke RH, et al. A psychometric evaluation of the Hospital Anxiety and Depression Scale for the medically hospitalized elderly. *Nordic journal of psychiatry* 2011;**65**(5):338-44.
13. Djukanovic I, Carlsson J, Arestedt K. Is the Hospital Anxiety and Depression Scale (HADS) a valid measure in a general population 65-80 years old? A psychometric evaluation study. *Health Qual Life Outcomes* 2017;**15**(1):193.
14. Bell ML, Fairclough DL, Fiero MH, et al. Handling missing items in the Hospital Anxiety and Depression Scale (HADS): a simulation study. *BMC research notes* 2016;**9**(1):479-79.

- 1  
2 1 15. Ashton H. Guidelines for the rational use of benzodiazepines. When and what to use. *Drugs*  
3 2 1994;**48**(1):25-40.  
4 3  
5 4 16. Sakshaug S, Handal M, Hjellvik V, et al. Long-term Use of Z-Hypnotics and Co-medication  
6 5 with Benzodiazepines and Opioids. *Basic & clinical pharmacology & toxicology* 2017;**120**(3):292-  
7 6 98.  
8 7  
9 8 17. Mordal J, Gundersen Ø, Bramness JG. Norwegian version of the Mini-International  
10 9 Neuropsychiatric Interview: Feasibility, acceptability and test-retest reliability in an acute  
11 10 psychiatric ward. *European Psychiatry* 2010;**25**(3):172-77.  
12 11  
13 12 18. American Psychiatric Association. Diagnostic and statistical manual of mental disorders, fourth  
14 13 edition. Washington, DC: American Psychiatric Association; 1994.  
15 14  
16 15 19. Gnjjidic D, Hilmer SN, Blyth FM, et al. Polypharmacy cutoff and outcomes: five or more  
17 16 medicines were used to identify community-dwelling older men at risk of different adverse  
18 17 outcomes. *Journal of clinical epidemiology* 2012;**65**(9):989-95.  
19 18  
20 19 20. StataCorp. Stata Statistical Software: Release 15. College Station, TX: StataCorp LLC, 2017.  
21 20  
22 21 21. Mokhar A, Kuhn S, Topp J, et al. Long-term use of benzodiazepines and Z drugs: a qualitative  
23 22 study of patients' and healthcare professionals' perceptions and possible levers for change. *BJGP*  
24 23 open 2019;**3**(1):bjgpopen18X101626.  
25 24  
26 25 22. Helsedirektoratet. Nasjonal faglig veileder vanedannende legemidler - rekvirering og  
27 26 forsvarlighet. [National guidelines - addictive drugs]. The Norwegian Directorate of Health; 2015.  
28 27  
29 28 23. Helsedirektoratet. Nasjonal faglig veileder for bruk av opioider - ved langvarige ikke-  
30 29 krefrelatererte smerter. [National guidelines for the use of opioids]. The Norwegian Directorate of  
31 30 Health; 2016.  
32 31  
33 32 24. Hernandez I, He M, Brooks MM, et al. Exposure-Response Association Between Concurrent  
34 33 Opioid and Benzodiazepine Use and Risk of Opioid-Related Overdose in Medicare Part D  
35 34 Beneficiaries. *JAMA Network Open* 2018;**1**(2):e180919-e19.  
36 35  
37 36 25. Sun EC, Dixit A, Humphreys K, et al. Association between concurrent use of prescription  
38 37 opioids and benzodiazepines and overdose: retrospective analysis. *bmj* 2017;**356**:j760.  
39 38  
40 39 26. Garg RK, Fulton-Kehoe D, Franklin GM. Patterns of opioid use and risk of opioid overdose  
41 40 death among Medicaid patients. *Medical care* 2017;**55**(7):661-68.  
42 41  
43 42 27. Nyborg G, Straand J, Klovning A, et al. The Norwegian General Practice–Nursing Home  
44 43 criteria (NORGEp-NH) for potentially inappropriate medication use: A web-based Delphi study.  
45 44 *Scandinavian journal of primary health care* 2015;**33**(2):134-41.  
46 45  
47 46 28. Panel AGSBCUE, Fick DM, Semla TP, et al. American Geriatrics Society 2015 updated beers  
48 47 criteria for potentially inappropriate medication use in older adults. *Journal of the American*  
49 48 *Geriatrics Society* 2015;**63**(11):2227-46.  
50 49  
51 50 29. Hamilton H, Gallagher P, Ryan C, et al. Potentially Inappropriate Medications Defined by  
52 51 STOPP Criteria and the Risk of Adverse Drug Events in Older Hospitalized Patients PIMs Defined  
53 52 by STOPP Criteria and Risk of ADEs. *JAMA Internal Medicine* 2011;**171**(11):1013-19.

- 1  
2 1 30. Neutel CI, Skurtveit S, Berg C. Benzodiazepine and z-hypnotic use in Norwegian elderly, aged  
3 2 65-79. *Norsk epidemiologi* 2012;**22**(2).  
4 3  
5 4 31. Voepel-Lewis T, Tait AR, Becher A, et al. An interactive web-based educational program  
6 5 improves prescription opioid risk knowledge and perceptions among parents. *Pain Management*  
7 6 2019(0).  
8 7  
9 8 32. Kline TV, Savage RL, Greenslade JH, et al. Affecting emergency department oxycodone  
10 9 discharge prescribing: An educational intervention. *Emergency Medicine Australasia*  
11 10 2019;**31**(4):580-86.  
12 11  
13 12 33. Kolodny A, Courtwright DT, Hwang CS, et al. The prescription opioid and heroin crisis: a  
14 13 public health approach to an epidemic of addiction. *Annual review of public health* 2015;**36**:559-74.  
15 14  
16 15 34. Weiß V, Nau R, Glaeske G, et al. The interplay of context factors in hypnotic and sedative  
17 16 prescription in primary and secondary care—a qualitative study. *European Journal of Clinical*  
18 17 *Pharmacology* 2019;**75**(1):87-97.  
19 18  
20 19 35. Kvarnström K, Airaksinen M, Liira H. Barriers and facilitators to medication adherence: a  
21 20 qualitative study with general practitioners. *BMJ open* 2018;**8**(1):e015332.  
22 21  
23 22 36. Kee JWY, Khoo HS, Lim I, et al. Communication Skills in Patient-Doctor Interactions:  
24 23 Learning from Patient Complaints. *Health Professions Education* 2018;**4**(2):97-106.  
25 24  
26 25 37. Sirdifield C, Anthierens S, Creupelandt H, et al. General practitioners' experiences and  
27 26 perceptions of benzodiazepine prescribing: systematic review and meta-synthesis. *BMC family*  
28 27 *practice* 2013;**14**(1):191.  
29 28  
30 29 38. Wongpakaran N, Wongpakaran T, Sirirak T, et al. Predictors of polypharmacy among elderly  
31 30 Thais with depressive and anxiety disorders: findings from the DAS study. *BMC geriatrics*  
32 31 2018;**18**(1):309.  
33 32  
34 33 39. Ancoli-Israel S, Shochat T. Chapter 135 - Insomnia in Older Adults A2 - Kryger, Meir H. In:  
35 34 Roth T, Dement WC, eds. *Principles and Practice of Sleep Medicine (Fifth Edition)*. Philadelphia:  
36 35 W.B. Saunders, 2011:1544-50.  
37 36  
38 37 40. Rambhade S, Chakarborty A, Shrivastava A, et al. A survey on polypharmacy and use of  
39 38 inappropriate medications. *Toxicology international* 2012;**19**(1):68.  
40 39  
41 40 41. Lam YWF. Polypharmacy in elderly opioid users. *The Brown University Psychopharmacology*  
42 41 *Update* 2019;**30**(5):2-3.  
43 42  
44 43 42. Hägg M, Houston B, Elmståhl S, et al. Sleep quality, use of hypnotics and sleeping habits in  
45 44 different age-groups among older people. *Scandinavian journal of caring sciences* 2014;**28**(4):842-  
46 45 51.  
47 46  
48 47 43. Yu B, Steptoe A, Niu K, et al. Prospective associations of social isolation and loneliness with  
49 48 poor sleep quality in older adults. *Quality of Life Research* 2018;**27**(3):683-91.  
50 49  
51 50 44. Mokhar A, Tillenburg N, Dirmaier J, et al. Potentially inappropriate use of benzodiazepines and  
52 51 z-drugs in the older population-analysis of associations between long-term use and patient-related  
53 52 factors. *PeerJ* 2018;**6**:e4614-e14.

- 1  
2 1 45. Luijendijk HJ, Tiemeier H, Hofman A, et al. Determinants of chronic benzodiazepine use in the  
3 2 elderly: A longitudinal study. *British Journal of Clinical Pharmacology* 2008;**65**(4):593-99.  
4 3  
5 4 46. Proulx-Tremblay V, Allary A, Payette M-C, et al. Social support and sleep quality in older  
6 5 benzodiazepine users. *Aging & mental health* 2019:1-7.  
7 6  
8 6  
9 7 47. Lee M, Silverman SM, Hansen H, et al. A comprehensive review of opioid-induced  
10 8 hyperalgesia. *Pain Physician* 2011;**14**(2):145-61.  
11 9  
12 10 48. Mitra S. Opioid-induced hyperalgesia: pathophysiology and clinical implications. *Journal of*  
13 11 *opioid management* 2018;**4**(3):123-30.  
14 12  
15 12  
16 13 49. Kripke DF. Greater incidence of depression with hypnotic use than with placebo. *BMC*  
17 14 *Psychiatry* 2007;**7**(1):42.  
18 15  
19 16 50. Abolhassani N, Haba-Rubio J, Heinzer R, et al. Ten-year trend in sleeping pills use in  
20 17 Switzerland: The CoLaus study. *Sleep Medicine* 2019.  
21 18  
22 18  
23 19 51. Means-Christensen AJ, Roy-Byrne PP, Sherbourne CD, et al. Relationships among pain,  
24 20 anxiety, and depression in primary care. *Depression and Anxiety* 2008;**25**(7):593-600.  
25 21  
26 22 52. Sheng J, Liu S, Wang Y, et al. The Link between Depression and Chronic Pain: Neural  
27 23 Mechanisms in the Brain. *Neural Plast* 2017;**2017**:9724371-71.  
28  
29  
30  
31  
32  
33  
34  
35  
36  
37  
38  
39  
40  
41  
42  
43  
44  
45  
46  
47  
48  
49  
50  
51  
52  
53  
54  
55  
56  
57  
58  
59  
60



1  
2  
3  
4  
5  
6  
7  
8  
9  
10  
11  
12  
13  
14  
15  
16  
17  
18  
19  
20  
21  
22  
23  
24  
25  
26  
27  
28  
29  
30  
31  
32  
33  
34  
35  
36  
37  
38  
39  
40  
41  
42  
43  
44  
45  
46  
47  
48  
49  
50  
51  
52  
53  
54  
55  
56  
57  
58  
59  
60

## **Figure legends**

**Figure 1.** Flow of participants through the study

**Table 1.** Patient characteristics

**Table 2.** Logistic regression models for factors associated with prolonged use of CNSDs – estimated using multiple imputations

**Table 3.** Logistic regression models for factors associated with CNSD misuse or dependence – estimated using multiple imputations

**Additional file 1.** Questionnaire and interview guide

**Additional file 2.** Sensitivity analyses

**Figure 1.** Flow of participants through the study

**SOCIODEMOGRAPHIC BACKGROUND****1. Sex** Male Female**2. The year you were born: .....****3. Your highest education level:** Basic education Secondary education College or university (number of years:.....)**4. Your annual income (NOK per year)** < 200 000 200 000–349 000  $\geq$  350 0000**5. Do you live alone?** No Yes

## THE HOSPITAL ANXIETY AND DEPRESSION SCALE

|                                                                                                                                                                                                                                                                                                                                                                   |                                                                                                                                                                                                                                                                                                                                              |
|-------------------------------------------------------------------------------------------------------------------------------------------------------------------------------------------------------------------------------------------------------------------------------------------------------------------------------------------------------------------|----------------------------------------------------------------------------------------------------------------------------------------------------------------------------------------------------------------------------------------------------------------------------------------------------------------------------------------------|
| <p><b>1. I feel tense or 'wound up':</b></p> <p>3 <input type="checkbox"/> Most of the time<br/>           2 <input type="checkbox"/> A lot of the time<br/>           1 <input type="checkbox"/> From time to time, occasionally<br/>           0 <input type="checkbox"/> Not at all</p>                                                                        | <p><b>2. I still enjoy the things I used to enjoy</b></p> <p>0 <input type="checkbox"/> Definitely as much<br/>           1 <input type="checkbox"/> Not quite so much<br/>           2 <input type="checkbox"/> Only a little<br/>           3 <input type="checkbox"/> Hardly at all</p>                                                   |
| <p><b>3. I get a sort of frightened feeling as if something awful is about to happen:</b></p> <p>3 <input type="checkbox"/> Very definitely and quite badly<br/>           2 <input type="checkbox"/> Yes, but not too badly<br/>           1 <input type="checkbox"/> A little, but it doesn't worry me<br/>           0 <input type="checkbox"/> Not at all</p> | <p><b>4. I can laugh and see the funny side of things:</b></p> <p>0 <input type="checkbox"/> As much as I always could<br/>           1 <input type="checkbox"/> Not quite so much now<br/>           2 <input type="checkbox"/> Definitely not so much now<br/>           3 <input type="checkbox"/> Not at all</p>                         |
| <p><b>5. Worrying thoughts go through my mind:</b></p> <p>3 <input type="checkbox"/> A great deal of the time<br/>           2 <input type="checkbox"/> A lot of the time<br/>           1 <input type="checkbox"/> From time to time but not too often<br/>           0 <input type="checkbox"/> Only occasionally</p>                                           | <p><b>6. I feel cheerful:</b></p> <p>3 <input type="checkbox"/> Not at all<br/>           2 <input type="checkbox"/> Not often<br/>           1 <input type="checkbox"/> Sometimes<br/>           0 <input type="checkbox"/> Most of the time</p>                                                                                            |
| <p><b>7. I can sit at ease and feel relaxed:</b></p> <p>0 <input type="checkbox"/> Definitely<br/>           1 <input type="checkbox"/> Usually<br/>           2 <input type="checkbox"/> Not often<br/>           3 <input type="checkbox"/> Not at all</p>                                                                                                      | <p><b>8. I feel as if I have slowed down:</b></p> <p>3 <input type="checkbox"/> Nearly all the time<br/>           2 <input type="checkbox"/> Very often<br/>           1 <input type="checkbox"/> Sometimes<br/>           0 <input type="checkbox"/> Not at all</p>                                                                        |
| <p><b>9. I get a sort of frightened feeling like 'butterflies' in the stomach:</b></p> <p>0 <input type="checkbox"/> Not at all<br/>           1 <input type="checkbox"/> Occasionally<br/>           2 <input type="checkbox"/> Quite often<br/>           3 <input type="checkbox"/> Very often</p>                                                             | <p><b>10. I have lost interest in my appearance:</b></p> <p>3 <input type="checkbox"/> Definitely<br/>           2 <input type="checkbox"/> I don't take so much care as I should<br/>           1 <input type="checkbox"/> I may not take quite as much care<br/>           0 <input type="checkbox"/> I take just as much care as ever</p> |
| <p><b>11. I feel restless as if I have to be on the move:</b></p> <p>3 <input type="checkbox"/> Very much indeed<br/>           2 <input type="checkbox"/> Quite a lot<br/>           1 <input type="checkbox"/> Not very much<br/>           0 <input type="checkbox"/> Not at all</p>                                                                           | <p><b>12. I look forward with enjoyment to things:</b></p> <p>0 <input type="checkbox"/> As much as ever I did<br/>           1 <input type="checkbox"/> Rather less than I used to<br/>           2 <input type="checkbox"/> Definitely less than I used to<br/>           3 <input type="checkbox"/> Hardly at all</p>                     |
| <p><b>13. I get sudden feelings of panic:</b></p> <p>3 <input type="checkbox"/> Very often indeed<br/>           2 <input type="checkbox"/> Quite often<br/>           1 <input type="checkbox"/> Not very often<br/>           0 <input type="checkbox"/> Not at all</p>                                                                                         | <p><b>14. I can enjoy a good book or radio or TV programme:</b></p> <p>0 <input type="checkbox"/> Often<br/>           1 <input type="checkbox"/> Sometimes<br/>           2 <input type="checkbox"/> Not often<br/>           3 <input type="checkbox"/> Very seldom</p>                                                                    |

**Total anxiety score:**

**Total depression score:**

**PAIN INTENSITY  
(Visual analogue scale)**

Please mark on the line to describe how much pain you are currently feeling:

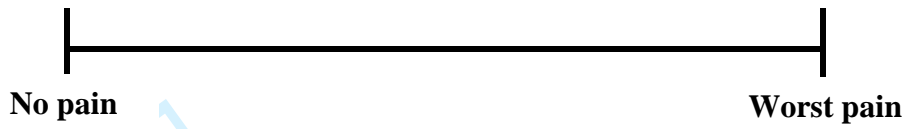

For peer review only

**MINI INTERNATIONAL NEUROPSYCHIATRIC INTERVIEW**

**DSM-IV criteria, Version 6.0.0**

**PSYCHOACTIVE SUBSTANCE USE DISORDERS (NON-ALCOHOL)**

➡ MEANS: GO TO THE DIAGNOSTIC BOXES, CIRCLE NO IN ALL DIAGNOSTIC BOXES, AND MOVE TO THE NEXT MODULE)

Now I am going to show you/read to you a list of street drugs or medicines.

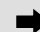

**J1** Have you in the past 12 months ever taken any of these drugs more than once to get high, NO YES  
to feel better, or to change your mood?

**CIRCLE EACH DRUG TAKEN:**

**Stimulants:** amphetamines, "speed", methamphetamine (crystal meth), "crank", "rush", Dexedrine, Ritalin, diet pills.

**Cocaine:** cocaine, snorting, IV, freebase, crack, "speedball".

**Opiates:** heroin, morphine, opium, methadone, codeine, OxyContin.

**Hallucinogens:** LSD ("acid"), mescaline, peyote, psilocybin, STP, "mushrooms", "ecstasy", MDA, MDMA.

**Phencyclidin:** PCP ("Angel Dust", "PeaCe Pill", "Tranq") or ketamin ("special K").

**Inhalants:** glue, ethyl chloride, "rush", dinitrogen monoxide ("laughing gas"), amyl or butyl nitrate ("poppers").

**Cannabis:** marijuana, hashish ("hash"), THC, "reefer", "grass".

**Anxiolytics:** Valium, Vival, Stesolid, Xanor (alprazolam), Seconal, Librium, Ativan, Halcion, barbiturates, GHB, Rohypnol ("Roofies").

**Miscellaneous:** steroids, nonprescription sleep or diet pills, cough syrup. Any others?

SPECIFY MOST USED DRUG(S): \_\_\_\_\_

WHICH SUBSTANCE(S)/MEDICATION(S) CAUSE THE MAJOR PROBLEMS? \_\_\_\_\_

**J2** Considering your use of (name the drug / drug class selected), in the past 12 months:

a. Have you found that you needed to use more (name of drug / drug class selected) NO YES  
to get the same effect that you did when you first started taking it?

b. When you reduced or stopped using (name of drug / drug class selected), did you have NO YES  
withdrawal symptoms (aches, shaking, fever, weakness, diarrhea, nausea, sweating,  
heart pounding, difficulty sleeping, or feeling agitated, anxious, irritable, or depressed)?  
Did you use any drug(s) to keep yourself from getting sick (withdrawal symptoms) or  
so that you would feel better?

IF YES TO EITHER QUESTION, CODE YES.

c. Have you often found that when you used (name of drug / drug class selected), NO YES

1  
2  
3 you ended up taking more than you thought you would?  
4

- 5  
6 d. Have you tried to reduce or stop taking (name of drug / drug class selected), but failed? NO YES  
7  
8 e. On the days that you used (name of drug / drug class selected), did you spend substantial NO YES  
9 time (> 2 hours) in obtaining, using or in recovering from drug(s), or thinking about drug(s)?  
10  
11  
12 f. Did you spend less time working, enjoying hobbies, or being with family or friends NO YES  
13 because of your drug use?  
14  
15  
16 g. Have you continued to use (name of drug / drug class selected) even though it caused NO YES  
17 you health or mental problems?  
18  
19  
20

21  
22 ARE **3** OR MORE **J2** ANSWERS CODED YES?

23  
24 SPECIFY DRUG(S): \_\_\_\_\_  
25  
26  
27

|                             |     |
|-----------------------------|-----|
| NO                          | YES |
| <i>SUBSTANCE DEPENDENCE</i> |     |

28  
29 **J3 Considering your use of (name the drug / drug class selected), in the past 12 months:**

- 30 a. Have you been intoxicated, high, or hungover from (name of drug / drug class selected) NO YES  
31 more than once, when you had other responsibilities at school, at work, or at home?  
32 Did this cause any problems?  
33 (CODE YES ONLY IF THIS CAUSED PROBLEMS.)  
34  
35 b. Have you been high or intoxicated from (name of drug / drug class selected) NO YES  
36 more than once, in any situation where you were physically at risk, (for example,  
37 driving a car, riding a motorbike, using machinery, boating, etc.)?  
38  
39 c. Did you have legal problems more than once, because of your drug use, NO YES  
40 for example, an arrest or disorderly conduct?  
41  
42 d. Did you continue to use (name of drug / drug class selected) even though it caused NO YES  
43 problems with your family or other people?  
44  
45  
46

47  
48 ARE **1** OR MORE **J3** ANSWERS CODED YES?

49  
50 SPECIFY DRUG(S): \_\_\_\_\_  
51  
52  
53  
54  
55  
56  
57  
58  
59  
60

|                        |     |
|------------------------|-----|
| NO                     | YES |
| <i>SUBSTANCE ABUSE</i> |     |
| <b>CURRENT</b>         |     |

**ADDITIONAL QUESTIONS TO CONFIRM MEDICATION USE PATTERNS**

1. How long have you been using this medication?
2. How many days per week do you need to take the medication (on average)?
3. Do you need to take it every day?  
If yes, ask: for how long the patient has used the medication every day?
4. Have there been periods that you have not used the medication at all?

For peer review only



Sensitivity analysis for factor associated with prolonged use of CNSDs – Logistic regression models, estimated using complete case analysis

| Independent variable                             | Bivariate         |                  | Multivariate        |                  |
|--------------------------------------------------|-------------------|------------------|---------------------|------------------|
|                                                  | OR (95%CI)        | P-value          | Adjusted OR (95%CI) | P-value          |
| <b>Sex</b>                                       |                   |                  |                     |                  |
| Male                                             | 1                 |                  | 1                   |                  |
| Female                                           | 2.05 (1.21-3.47)  | <b>0.007</b>     | 1.64 (0.77-3.50)    | 0.20             |
| <b>Age groups, years</b>                         |                   |                  |                     |                  |
| 65-74                                            | 1                 |                  | 1                   |                  |
| 75-84                                            | 2.25 (1.27-4.00)  | <b>0.006</b>     | 2.31 (1.07-5.01)    | <b>0.03</b>      |
| ≥ 85                                             | 3.91 (1.75-8.74)  | <b>0.001</b>     | 3.52 (1.11-11.20)   | <b>0.03</b>      |
| <b>Education, years</b>                          |                   |                  |                     |                  |
| Basic education (≤ 10)                           | 1                 |                  | 1                   |                  |
| Secondary education (11-13)                      | 0.26 (0.12-0.54)  | <b>&lt;0.001</b> | 0.35 (0.13-0.97)    | <b>0.04</b>      |
| Higher education (≥ 14)                          | 0.30 (0.14-0.64)  | <b>0.002</b>     | 0.41 (0.15-1.14)    | 0.09             |
| <b>Income (NOK/year)</b>                         |                   |                  |                     |                  |
| < 200 000                                        | 1                 |                  | 1                   |                  |
| 200 000 – 349 000                                | 0.63 (0.24-1.68)  | 0.36             | 0.48 (0.14-1.67)    | 0.25             |
| ≥ 350 000                                        | 0.25 (0.09-0.66)  | <b>0.005</b>     | 0.18 (0.05-0.69)    | <b>0.01</b>      |
| <b>Living alone</b>                              |                   |                  |                     |                  |
| No                                               | 1                 |                  | 1                   |                  |
| Yes                                              | 1.80 (1.08-3.01)  | <b>0.03</b>      | 0.56 (0.25-1.27)    | 0.17             |
| <b>Polypharmacy (≥ 5 drugs/day)</b>              |                   |                  |                     |                  |
| No                                               | 1                 |                  | 1                   |                  |
| Yes                                              | 6.95 (3.13-15.41) | <b>&lt;0.001</b> | 4.64 (1.73-12.48)   | <b>0.002</b>     |
| <b>Anxiety scores (HADS-A)</b>                   | 1.07 (0.99-1.15)  | 0.08             | 1.04 (0.92-1.17)    | 0.54             |
| <b>Depression scores (HADS-D)</b>                | 1.15 (1.06-1.26)  | <b>0.001</b>     | 1.08 (0.95-1.23)    | 0.23             |
| <b>Pain intensity (millimeters on VAS scale)</b> | 1.02 (1.01-1.03)  | <b>&lt;0.001</b> | 1.03 (1.01-1.04)    | <b>&lt;0.001</b> |

Abbreviations:

CNSD – central nervous system depressant drugs

HADS–D/A – hospital anxiety and depression scale, depression or anxiety subscore.

Sensitivity analysis for factors associated with CNSD misuse or dependence – Logistic regression models, estimated using complete case analysis

| Independent variable                           | Bivariate         |              | Multivariate        |              |
|------------------------------------------------|-------------------|--------------|---------------------|--------------|
|                                                | OR (95%CI)        | P-value      | Adjusted OR (95%CI) | P-value      |
| <b>Sex</b>                                     |                   |              |                     |              |
| Male                                           | 1                 |              | 1                   |              |
| Female                                         | 1.54 (0.65-3.67)  | 0.33         | 1.50 (0.43-5.25)    | 0.52         |
| <b>Age, years</b>                              |                   |              |                     |              |
| 65-74                                          | 1                 |              | 1                   |              |
| 75-84                                          | 0.90 (0.34-2.37)  | 0.83         | 1.46 (0.36-5.96)    | 0.60         |
| ≥ 85                                           | 2.40 (0.75-7.65)  | 0.14         | 3.33 (0.55-20.16)   | 0.19         |
| <b>Education, years</b>                        |                   |              |                     |              |
| Basic education (≤10)                          | 1                 |              | 1                   |              |
| Secondary education (11-13)                    | 0.62 (0.22-1.77)  | 0.37         | 0.96 (0.20-4.60)    | 0.96         |
| Higher education (≥14)                         | 0.85 (0.31-2.32)  | 0.75         | 0.94 (0.22-3.99)    | 0.93         |
| <b>Income (NOK/year)</b>                       |                   |              |                     |              |
| < 200 000                                      | 1                 |              | 1                   |              |
| 200 000 – 349 000                              | 0.92 (0.27-3.21)  | 0.90         | 1.67 (0.28-9.95)    | 0.57         |
| ≥ 350 000                                      | 0.44 (0.11-1.73)  | 0.24         | 0.83 (0.10-6.94)    | 0.86         |
| <b>Living alone</b>                            |                   |              |                     |              |
| No                                             | 1                 |              | 1                   |              |
| Yes                                            | 2.65 (1.14-6.18)  | <b>0.02</b>  | 2.24 (0.53-9.44)    | 0.27         |
| <b>Polypharmacy (≥ 5 drugs/day)</b>            |                   |              |                     |              |
| No                                             | 1                 |              | 1                   |              |
| Yes                                            | 2.02 (0.39-10.55) | 0.41         | 1.74 (0.14-21.22)   | 0.66         |
| <b>Concurrent use</b>                          |                   |              |                     |              |
| No (exclusive use)                             | 1                 |              | 1                   |              |
| Yes                                            | 3.5 (1.44-8.54)   | <b>0.006</b> | 8.77 (2.19-35.10)   | <b>0.002</b> |
| <b>Duration of CNSD use (weeks)</b>            | 1.00 (0.99-1.00)  | 0.94         | 1.00 (0.99-1.01)    | 0.11         |
| <b>Anxiety scores (HADS-A)</b>                 | 1.08(0.97-1.21)   | 0.15         | 1.01 (0.82-1.25)    | 0.94         |
| <b>Depression scores (HADS-D)</b>              | 1.05 (0.93-1.19)  | 0.42         | 1.01 (0.81-1.27)    | 0.92         |
| <b>Pain intensity (millimeters, VAS scale)</b> | 1.01 (0.99-1.03)  | 0.08         | 1.03 (1.01-1.06)    | <b>0.009</b> |

Abbreviations:

CNSD – central nervous system depressant drugs

HADS–D/A – hospital anxiety and depression scale, depression or anxiety subscore.

1  
2  
3  
4  
5  
6  
7  
8  
9  
10  
11  
12  
13  
14  
15  
16  
17  
18  
19  
20  
21  
22  
23  
24  
25  
26  
27  
28  
29  
30  
31  
32  
33  
34  
35  
36  
37  
38  
39  
40  
41  
42  
43  
44  
45  
46  
47  
48  
49  
50  
51  
52  
53  
54  
55  
56  
57  
58  
59  
60STROBE Statement—Checklist of items that should be included in reports of *cross-sectional studies*

|                              | Item No | Recommendation                                                                                                                                                                                    | Reported on page # |
|------------------------------|---------|---------------------------------------------------------------------------------------------------------------------------------------------------------------------------------------------------|--------------------|
| <b>Title and abstract</b>    | 1       | (a) Indicate the study's design with a commonly used term in the title or the abstract                                                                                                            | 1                  |
|                              |         | (b) Provide in the abstract an informative and balanced summary of what was done and what was found                                                                                               | 2-3                |
| <b>Introduction</b>          |         |                                                                                                                                                                                                   |                    |
| Background/rationale         | 2       | Explain the scientific background and rationale for the investigation being reported                                                                                                              | 4-5                |
| Objectives                   | 3       | State specific objectives, including any prespecified hypotheses                                                                                                                                  | 5                  |
| <b>Methods</b>               |         |                                                                                                                                                                                                   |                    |
| Study design                 | 4       | Present key elements of study design early in the paper                                                                                                                                           | 5                  |
| Setting                      | 5       | Describe the setting, locations, and relevant dates, including periods of recruitment, exposure, follow-up, and data collection                                                                   | 5-6                |
| Participants                 | 6       | (a) Give the eligibility criteria, and the sources and methods of selection of participants                                                                                                       | 5-6                |
| Variables                    | 7       | Clearly define all outcomes, exposures, predictors, potential confounders, and effect modifiers. Give diagnostic criteria, if applicable                                                          | 6-7                |
| Data sources/<br>measurement | 8*      | For each variable of interest, give sources of data and details of methods of assessment (measurement). Describe comparability of assessment methods if there is more than one group              | 6-7                |
| Bias                         | 9       | Describe any efforts to address potential sources of bias                                                                                                                                         | 5-8                |
| Study size                   | 10      | Explain how the study size was arrived at                                                                                                                                                         | 8                  |
| Quantitative variables       | 11      | Explain how quantitative variables were handled in the analyses. If applicable, describe which groupings were chosen and why                                                                      | 6-8                |
| Statistical methods          | 12      | (a) Describe all statistical methods, including those used to control for confounding                                                                                                             | 7-8                |
|                              |         | (b) Describe any methods used to examine subgroups and interactions                                                                                                                               | 7-8                |
|                              |         | (c) Explain how missing data were addressed                                                                                                                                                       | 8                  |
|                              |         | (d) If applicable, describe analytical methods taking account of sampling strategy                                                                                                                | N/A                |
|                              |         | (e) Describe any sensitivity analyses                                                                                                                                                             | 8                  |
| <b>Results</b>               |         |                                                                                                                                                                                                   |                    |
| Participants                 | 13*     | (a) Report numbers of individuals at each stage of study—eg numbers potentially eligible, examined for eligibility, confirmed eligible, included in the study, completing follow-up, and analysed | 8                  |
|                              |         | (b) Give reasons for non-participation at each stage                                                                                                                                              | 8                  |
|                              |         | (c) Consider use of a flow diagram                                                                                                                                                                | 8                  |
| Descriptive data             | 14*     | (a) Give characteristics of study participants (eg demographic, clinical, social)                                                                                                                 | 9-10               |

|                          |     |                                                                                                                                                                                                              |       |
|--------------------------|-----|--------------------------------------------------------------------------------------------------------------------------------------------------------------------------------------------------------------|-------|
|                          |     | and information on exposures and potential confounders                                                                                                                                                       |       |
|                          |     | (b) Indicate number of participants with missing data for each variable of interest                                                                                                                          | 8     |
| Outcome data             | 15* | Report numbers of outcome events or summary measures                                                                                                                                                         | 8-11  |
| Main results             | 16  | (a) Give unadjusted estimates and, if applicable, confounder-adjusted estimates and their precision (eg, 95% confidence interval). Make clear which confounders were adjusted for and why they were included | 11-13 |
|                          |     | (b) Report category boundaries when continuous variables were categorized                                                                                                                                    | 10    |
|                          |     | (c) If relevant, consider translating estimates of relative risk into absolute risk for a meaningful time period                                                                                             | N/A   |
| Other analyses           | 17  | Report other analyses done—eg analyses of subgroups and interactions, and sensitivity analyses                                                                                                               | 9-13  |
| <b>Discussion</b>        |     |                                                                                                                                                                                                              |       |
| Key results              | 18  | Summarise key results with reference to study objectives                                                                                                                                                     | 13-14 |
| Limitations              | 19  | Discuss limitations of the study, taking into account sources of potential bias or imprecision. Discuss both direction and magnitude of any potential bias                                                   | 14    |
| Interpretation           | 20  | Give a cautious overall interpretation of results considering objectives, limitations, multiplicity of analyses, results from similar studies, and other relevant evidence                                   | 14-17 |
| Generalisability         | 21  | Discuss the generalisability (external validity) of the study results                                                                                                                                        | 14    |
| <b>Other information</b> |     |                                                                                                                                                                                                              |       |
| Funding                  | 22  | Give the source of funding and the role of the funders for the present study and, if applicable, for the original study on which the present article is based                                                | 17    |

\*Give information separately for exposed and unexposed groups.

**Note:** An Explanation and Elaboration article discusses each checklist item and gives methodological background and published examples of transparent reporting. The STROBE checklist is best used in conjunction with this article (freely available on the Web sites of PLoS Medicine at <http://www.plosmedicine.org/>, Annals of Internal Medicine at <http://www.annals.org/>, and Epidemiology at <http://www.epidem.com/>). Information on the STROBE Initiative is available at [www.strobe-statement.org](http://www.strobe-statement.org).
