# Supplementary material for: Sociodemographic, clinical and pharmacological profiles of medication misuse and dependence in hospitalised older patients in Norway: a prospective cross-sectional study
Source: PubMed Central journal article supplement — BMJ Open. 2019 Sep 5;9(9):e031483. doi: 10.1136/bmjopen-2019-031483 (PMC6731874; doi:10.1136/bmjopen-2019-031483), 2019-09-05
Supplement: bmjopen-2019-031483supp001.pdf [file bmjopen-2019-031483supp001.pdf]

**SOCIODEMOGRAPHIC BACKGROUND****1. Sex** Male Female**2. The year you were born: .....****3. Your highest education level:** Basic education Secondary education College or university (number of years:.....)**4. Your annual income (NOK per year)** < 200 000 200 000–349 000 ≥ 350 0000**5. Do you live alone?** No Yes

## THE HOSPITAL ANXIETY AND DEPRESSION SCALE

|                                                                                                                                                                                                                                                                                                                                                                   |                                                                                                                                                                                                                                                                                                                                              |
|-------------------------------------------------------------------------------------------------------------------------------------------------------------------------------------------------------------------------------------------------------------------------------------------------------------------------------------------------------------------|----------------------------------------------------------------------------------------------------------------------------------------------------------------------------------------------------------------------------------------------------------------------------------------------------------------------------------------------|
| <p><b>1. I feel tense or 'wound up':</b></p> <p>3 <input type="checkbox"/> Most of the time<br/>           2 <input type="checkbox"/> A lot of the time<br/>           1 <input type="checkbox"/> From time to time, occasionally<br/>           0 <input type="checkbox"/> Not at all</p>                                                                        | <p><b>2. I still enjoy the things I used to enjoy</b></p> <p>0 <input type="checkbox"/> Definitely as much<br/>           1 <input type="checkbox"/> Not quite so much<br/>           2 <input type="checkbox"/> Only a little<br/>           3 <input type="checkbox"/> Hardly at all</p>                                                   |
| <p><b>3. I get a sort of frightened feeling as if something awful is about to happen:</b></p> <p>3 <input type="checkbox"/> Very definitely and quite badly<br/>           2 <input type="checkbox"/> Yes, but not too badly<br/>           1 <input type="checkbox"/> A little, but it doesn't worry me<br/>           0 <input type="checkbox"/> Not at all</p> | <p><b>4. I can laugh and see the funny side of things:</b></p> <p>0 <input type="checkbox"/> As much as I always could<br/>           1 <input type="checkbox"/> Not quite so much now<br/>           2 <input type="checkbox"/> Definitely not so much no<br/>           3 <input type="checkbox"/> Not at all</p>                          |
| <p><b>5. Worrying thoughts go through my mind:</b></p> <p>3 <input type="checkbox"/> A great deal of the time<br/>           2 <input type="checkbox"/> A lot of the time<br/>           1 <input type="checkbox"/> From time to time but not too often<br/>           0 <input type="checkbox"/> Only occasionally</p>                                           | <p><b>6. I feel cheerful:</b></p> <p>3 <input type="checkbox"/> Not at all<br/>           2 <input type="checkbox"/> Not often<br/>           1 <input type="checkbox"/> Sometimes<br/>           0 <input type="checkbox"/> Most of the time</p>                                                                                            |
| <p><b>7. I can sit at ease and feel relaxed:</b></p> <p>0 <input type="checkbox"/> Definitely<br/>           1 <input type="checkbox"/> Usually<br/>           2 <input type="checkbox"/> Not often<br/>           3 <input type="checkbox"/> Not at all</p>                                                                                                      | <p><b>8. I feel as if I have slowed down:</b></p> <p>3 <input type="checkbox"/> Nearly all the time<br/>           2 <input type="checkbox"/> Very often<br/>           1 <input type="checkbox"/> Sometimes<br/>           0 <input type="checkbox"/> Not at all</p>                                                                        |
| <p><b>9. I get a sort of frightened feeling like 'butterflies' in the stomach:</b></p> <p>0 <input type="checkbox"/> Not at all<br/>           1 <input type="checkbox"/> Occasionally<br/>           2 <input type="checkbox"/> Quite often<br/>           3 <input type="checkbox"/> Very often</p>                                                             | <p><b>10. I have lost interest in my appearance:</b></p> <p>3 <input type="checkbox"/> Definitely<br/>           2 <input type="checkbox"/> I don't take so much care as I should<br/>           1 <input type="checkbox"/> I may not take quite as much care<br/>           0 <input type="checkbox"/> I take just as much care as ever</p> |
| <p><b>11. I feel restless as if I have to be on the move:</b></p> <p>3 <input type="checkbox"/> Very much indeed<br/>           2 <input type="checkbox"/> Quite a lot<br/>           1 <input type="checkbox"/> Not very much<br/>           0 <input type="checkbox"/> Not at all</p>                                                                           | <p><b>12. I look forward with enjoyment to things:</b></p> <p>0 <input type="checkbox"/> As much as ever I did<br/>           1 <input type="checkbox"/> Rather less than I used to<br/>           2 <input type="checkbox"/> Definitely less than I used to<br/>           3 <input type="checkbox"/> Hardly at all</p>                     |
| <p><b>13. I get sudden feelings of panic:</b></p> <p>3 <input type="checkbox"/> Very often indeed<br/>           2 <input type="checkbox"/> Quite often<br/>           1 <input type="checkbox"/> Not very often<br/>           0 <input type="checkbox"/> Not at all</p>                                                                                         | <p><b>14. I can enjoy a good book or radio or TV programme:</b></p> <p>0 <input type="checkbox"/> Often<br/>           1 <input type="checkbox"/> Sometimes<br/>           2 <input type="checkbox"/> Not often<br/>           3 <input type="checkbox"/> Very seldom</p>                                                                    |

**Total anxiety score:**

**Total depression score:**

**PAIN INTENSITY**  
**(Visual analogue scale)**

Please mark on the line to describe how much pain you are currently feeling:

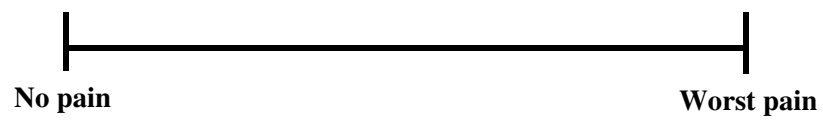

## MINI INTERNATIONAL NEUROPSYCHIATRIC INTERVIEW

### DSM-IV criteria, Version 6.0.0

#### PSYCHOACTIVE SUBSTANCE USE DISORDERS (NON-ALCOHOL)

➡ MEANS: GO TO THE DIAGNOSTIC BOXES, CIRCLE NO IN ALL DIAGNOSTIC BOXES, AND MOVE TO THE NEXT MODULE)

Now I am going to show you/read to you a list of street drugs or medicines.

|           |                                                                                                                                         |   |    |     |
|-----------|-----------------------------------------------------------------------------------------------------------------------------------------|---|----|-----|
| <b>J1</b> | <p>Have you in the past 12 months ever taken any of these drugs more than once to get high, to feel better, or to change your mood?</p> | ➡ | NO | YES |
|-----------|-----------------------------------------------------------------------------------------------------------------------------------------|---|----|-----|

#### CIRCLE EACH DRUG TAKEN:

**Stimulants:** amphetamines, "speed", methamphetamine (crystal meth), "crank", "rush", Dexedrine, Ritalin, diet pills.

**Cocaine:** cocaine, snorting, IV, freebase, crack, "speedball".

**Opiates:** heroin, morphine, opium, methadone, codeine, OxyContin.

**Hallucinogens:** LSD ("acid"), mescaline, peyote, psilocybin, STP, "mushrooms", "ecstasy", MDA, MDMA.

**Phencyclidin:** PCP ("Angel Dust", "PeaCe Pill", "Tranq") or ketamin ("special K").

**Inhalants:** glue, ethyl chloride, "rush", dinitrogen monoxide ("laughing gas"), amyl or butyl nitrate ("poppers").

**Cannabis:** marijuana, hashish ("hash"), THC, "reefer", "grass".

**Anxiolytics:** Valium, Vival, Stesolid, Xanor (alprazolam), Seconal, Librium, Ativan, Halcion, barbiturates, GHB, Rohypnol ("Roofies").

**Miscellaneous:** steroids, nonprescription sleep or diet pills, cough syrup. Any others?

SPECIFY MOST USED DRUG(S): \_\_\_\_\_

WHICH SUBSTANCE(S)/MEDICATION(S) CAUSE THE MAJOR PROBLEMS? \_\_\_\_\_

#### **J2 Considering your use of (name the drug / drug class selected), in the past 12 months:**

- |    |                                                                                                                                                                                                                                                                                                                                                                                               |    |     |
|----|-----------------------------------------------------------------------------------------------------------------------------------------------------------------------------------------------------------------------------------------------------------------------------------------------------------------------------------------------------------------------------------------------|----|-----|
| a. | <p>Have you found that you needed to use more (name of drug / drug class selected) to get the same effect that you did when you first started taking it?</p>                                                                                                                                                                                                                                  | NO | YES |
| b. | <p>When you reduced or stopped using (name of drug / drug class selected), did you have withdrawal symptoms (aches, shaking, fever, weakness, diarrhea, nausea, sweating, heart pounding, difficulty sleeping, or feeling agitated, anxious, irritable, or depressed)? Did you use any drug(s) to keep yourself from getting sick (withdrawal symptoms) or so that you would feel better?</p> | NO | YES |

IF YES TO EITHER QUESTION, CODE YES.

- |    |                                                                                      |    |     |
|----|--------------------------------------------------------------------------------------|----|-----|
| c. | <p>Have you often found that when you used (name of drug / drug class selected),</p> | NO | YES |
|----|--------------------------------------------------------------------------------------|----|-----|

you ended up taking more than you thought you would?

- d. Have you tried to reduce or stop taking (name of drug / drug class selected), but failed? NO YES
- e. On the days that you used (name of drug / drug class selected), did you spend substantial time (> 2 hours) in obtaining, using or in recovering from drug(s), or thinking about drug(s)? NO YES
- f. Did you spend less time working, enjoying hobbies, or being with family or friends because of your drug use? NO YES
- g. Have you continued to use (name of drug / drug class selected) even though it caused you health or mental problems? NO YES

ARE 3 OR MORE **J2** ANSWERS CODED YES?

SPECIFY DRUG(S): \_\_\_\_\_

|                             |     |
|-----------------------------|-----|
| NO                          | YES |
| <i>SUBSTANCE DEPENDENCE</i> |     |

**J3 Considering your use of (name the drug / drug class selected), in the past 12 months:**

- a. Have you been intoxicated, high, or hungover from (name of drug / drug class selected) more than once, when you had other responsibilities at school, at work, or at home? NO YES  
Did this cause any problems?  
(CODE YES ONLY IF THIS CAUSED PROBLEMS.)
- b. Have you been high or intoxicated from (name of drug / drug class selected) more than once, in any situation where you were physically at risk, (for example, driving a car, riding a motorbike, using machinery, boating, etc.)? NO YES
- c. Did you have legal problems more than once, because of your drug use, for example, an arrest or disorderly conduct? NO YES
- d. Did you continue to use (name of drug / drug class selected) even though it caused problems with your family or other people? NO YES

ARE 1 OR MORE **J3** ANSWERS CODED YES?

SPECIFY DRUG(S): \_\_\_\_\_

|                        |     |
|------------------------|-----|
| NO                     | YES |
| <i>SUBSTANCE ABUSE</i> |     |
| <b>CURRENT</b>         |     |

**ADDITIONAL QUESTIONS TO CONFIRM MEDICATION USE PATTERNS**

1. How long have you been using this medication?
2. How many days per week do you need to take the medication (on average)?
3. Do you need to take it every day?

If yes, ask: for how long the patient has used the medication every day?

4. Have there been periods that you have not used the medication at all?
