# Supplementary material for: Sociodemographic, clinical and pharmacological profiles of medication misuse and dependence in hospitalised older patients in Norway: a prospective cross-sectional study
Source: PubMed Central journal article supplement — BMJ Open. 2019 Sep 5;9(9):e031483. doi: 10.1136/bmjopen-2019-031483 (PMC6731874; doi:10.1136/bmjopen-2019-031483), 2019-09-05
Supplement: bmjopen-2019-031483supp002.pdf [file bmjopen-2019-031483supp002.pdf]

Sensitivity analysis for factor associated with prolonged use of CNSDs – Logistic regression models, estimated using complete case analysis

| Independent variable                                                              | Bivariate         |                  | Multivariate        |                  |
|-----------------------------------------------------------------------------------|-------------------|------------------|---------------------|------------------|
|                                                                                   | OR (95%CI)        | P-value          | Adjusted OR (95%CI) | P-value          |
| <b>Sex</b>                                                                        |                   |                  |                     |                  |
| Male                                                                              | 1                 |                  | 1                   |                  |
| Female                                                                            | 2.05 (1.21-3.47)  | <b>0.007</b>     | 1.64 (0.77-3.50)    | 0.20             |
| <b>Age groups, years</b>                                                          |                   |                  |                     |                  |
| 65-74                                                                             | 1                 |                  | 1                   |                  |
| 75-84                                                                             | 2.25 (1.27-4.00)  | <b>0.006</b>     | 2.31 (1.07-5.01)    | <b>0.03</b>      |
| ≥ 85                                                                              | 3.91 (1.75-8.74)  | <b>0.001</b>     | 3.52 (1.11-11.20)   | <b>0.03</b>      |
| <b>Education, years</b>                                                           |                   |                  |                     |                  |
| Basic education (≤ 10)                                                            | 1                 |                  | 1                   |                  |
| Secondary education (11-13)                                                       | 0.26 (0.12-0.54)  | <b>&lt;0.001</b> | 0.35 (0.13-0.97)    | <b>0.04</b>      |
| Higher education (≥ 14)                                                           | 0.30 (0.14-0.64)  | <b>0.002</b>     | 0.41 (0.15-1.14)    | 0.09             |
| <b>Income (NOK/year)</b>                                                          |                   |                  |                     |                  |
| < 200 000                                                                         | 1                 |                  | 1                   |                  |
| 200 000 – 349 000                                                                 | 0.63 (0.24-1.68)  | 0.36             | 0.48 (0.14-1.67)    | 0.25             |
| ≥ 350 000                                                                         | 0.25 (0.09-0.66)  | <b>0.005</b>     | 0.18 (0.05-0.69)    | <b>0.01</b>      |
| <b>Living alone</b>                                                               |                   |                  |                     |                  |
| No                                                                                | 1                 |                  | 1                   |                  |
| Yes                                                                               | 1.80 (1.08-3.01)  | <b>0.03</b>      | 0.56 (0.25-1.27)    | 0.17             |
| <b>Polypharmacy (≥ 5 drugs/day)</b>                                               |                   |                  |                     |                  |
| No                                                                                | 1                 |                  | 1                   |                  |
| Yes                                                                               | 6.95 (3.13-15.41) | <b>&lt;0.001</b> | 4.64 (1.73-12.48)   | <b>0.002</b>     |
| <b>Anxiety scores (HADS-A)</b>                                                    | 1.07 (0.99-1.15)  | 0.08             | 1.04 (0.92-1.17)    | 0.54             |
| <b>Depression scores (HADS-D)</b>                                                 | 1.15 (1.06-1.26)  | <b>0.001</b>     | 1.08 (0.95-1.23)    | 0.23             |
| <b>Pain intensity</b><br>(millimeters on VAS scale)                               | 1.02 (1.01-1.03)  | <b>&lt;0.001</b> | 1.03 (1.01-1.04)    | <b>&lt;0.001</b> |
| Abbreviations:                                                                    |                   |                  |                     |                  |
| CNSD – central nervous system depressant drugs                                    |                   |                  |                     |                  |
| HADS–D/A – hospital anxiety and depression scale, depression or anxiety subscore. |                   |                  |                     |                  |

Sensitivity analysis for factors associated with CNSD misuse or dependence – Logistic regression models, estimated using complete case analysis

| Independent variable                           | Bivariate         |              | Multivariate        |              |
|------------------------------------------------|-------------------|--------------|---------------------|--------------|
|                                                | OR (95%CI)        | P-value      | Adjusted OR (95%CI) | P-value      |
| <b>Sex</b>                                     |                   |              |                     |              |
| Male                                           | 1                 |              | 1                   |              |
| Female                                         | 1.54 (0.65-3.67)  | 0.33         | 1.50 (0.43-5.25)    | 0.52         |
| <b>Age, years</b>                              |                   |              |                     |              |
| 65-74                                          | 1                 |              | 1                   |              |
| 75-84                                          | 0.90 (0.34-2.37)  | 0.83         | 1.46 (0.36-5.96)    | 0.60         |
| ≥ 85                                           | 2.40 (0.75-7.65)  | 0.14         | 3.33 (0.55-20.16)   | 0.19         |
| <b>Education, years</b>                        |                   |              |                     |              |
| Basic education (≤10)                          | 1                 |              | 1                   |              |
| Secondary education (11-13)                    | 0.62 (0.22-1.77)  | 0.37         | 0.96 (0.20-4.60)    | 0.96         |
| Higher education (≥14)                         | 0.85 (0.31-2.32)  | 0.75         | 0.94 (0.22-3.99)    | 0.93         |
| <b>Income (NOK/year)</b>                       |                   |              |                     |              |
| < 200 000                                      | 1                 |              | 1                   |              |
| 200 000 – 349 000                              | 0.92 (0.27-3.21)  | 0.90         | 1.67 (0.28-9.95)    | 0.57         |
| ≥ 350 000                                      | 0.44 (0.11-1.73)  | 0.24         | 0.83 (0.10-6.94)    | 0.86         |
| <b>Living alone</b>                            |                   |              |                     |              |
| No                                             | 1                 |              | 1                   |              |
| Yes                                            | 2.65 (1.14-6.18)  | <b>0.02</b>  | 2.24 (0.53-9.44)    | 0.27         |
| <b>Polypharmacy (≥ 5 drugs/day)</b>            |                   |              |                     |              |
| No                                             | 1                 |              | 1                   |              |
| Yes                                            | 2.02 (0.39-10.55) | 0.41         | 1.74 (0.14-21.22)   | 0.66         |
| <b>Concurrent use</b>                          |                   |              |                     |              |
| No (exclusive use)                             | 1                 |              | 1                   |              |
| Yes                                            | 3.5 (1.44-8.54)   | <b>0.006</b> | 8.77 (2.19-35.10)   | <b>0.002</b> |
| <b>Duration of CNSD use (weeks)</b>            | 1.00 (0.99-1.00)  | 0.94         | 1.00 (0.99-1.01)    | 0.11         |
| <b>Anxiety scores (HADS-A)</b>                 | 1.08(0.97-1.21)   | 0.15         | 1.01 (0.82-1.25)    | 0.94         |
| <b>Depression scores (HADS-D)</b>              | 1.05 (0.93-1.19)  | 0.42         | 1.01 (0.81-1.27)    | 0.92         |
| <b>Pain intensity (millimeters, VAS scale)</b> | 1.01 (0.99-1.03)  | 0.08         | 1.03 (1.01-1.06)    | <b>0.009</b> |

Abbreviations:

CNSD – central nervous system depressant drugs

HADS–D/A – hospital anxiety and depression scale, depression or anxiety subscore.
